# Supplementary material for: Vitamin E Can Ameliorate Oxidative Damage of Ovine Hepatocytes In Vitro by Regulating Genes Expression Associated with Apoptosis and Pyroptosis, but Not Ferroptosis
Source: Molecules. 2021 Jul 27;26(15):4520. doi: 10.3390/molecules26154520 (PMC8348559; doi:10.3390/molecules26154520)
Supplement: Supplementary file 1 [file molecules-26-04520-s001.zip]

Archive with 7 entries (7 files):
- molecules-1301163-supplementary Figure S1.pdf
- molecules-1301163-supplementary Figure S2.pdf
- Supplementary File 1.xls
- Supplementary File 2.xls
- Supplementary File 3.xls
- Supplementary File 4.xls
- Supplementary File 5.xlsx
