# Supplementary material for: Vitamin E Can Ameliorate Oxidative Damage of Ovine Hepatocytes In Vitro by Regulating Genes Expression Associated with Apoptosis and Pyroptosis, but Not Ferroptosis
Source: Molecules. 2021 Jul 27;26(15):4520. doi: 10.3390/molecules26154520 (PMC8348559; doi:10.3390/molecules26154520)
Supplement: Supplementary file 1 [file molecules-26-04520-s001.zip › Supplementary File 1.xls]

GO ID (level1)	GO Term (level1)	GO ID (level2)	GO Term (level2)	number_of_C1-vs-C2 (up)	number_of_C1-vs-C2 (down)	Genes_of_C1-vs-C2_up	Genes_of_C1-vs-C2_down
GO:0008150	Biological Process	GO:0071840	cellular component organization or biogenesis	274	74	ENSOARG00000000072(FOSL1),ENSOARG00000000096(BCLAF1),ENSOARG00000000099(TOP3A),ENSOARG00000000285(INSR),ENSOARG00000000286(GOLGA4),ENSOARG00000000336(GCC2),ENSOARG00000000347(TRRAP),ENSOARG00000000433(NAP1L5),ENSOARG00000000454(PTPRF),ENSOARG00000000483(NFKB2),ENSOARG00000000580(FLII),ENSOARG00000000637(EHMT1),ENSOARG00000000732(XPC),ENSOARG00000000742(DNAJA4),ENSOARG00000001006(ZBTB1),ENSOARG000…	ENSOARG00000000291(FGB),ENSOARG00000000644(FAM83D),ENSOARG00000001001(-),ENSOARG00000001102(KIF2C),ENSOARG00000001111(ID1),ENSOARG00000001113(COL16A1),ENSOARG00000002369(PSMC3IP),ENSOARG00000003186(CENPT),ENSOARG00000003547(MYBL2),ENSOARG00000003603(DPYSL3),ENSOARG00000004318(CDK1),ENSOARG00000004359(SKA1),ENSOARG00000004421(CDKN2C),ENSOARG00000005591(KIF22),ENSOARG00000005750(CENPH),ENSOARG00000…
GO:0008150	Biological Process	GO:0065007	biological regulation	462	132	ENSOARG00000000072(FOSL1),ENSOARG00000000096(BCLAF1),ENSOARG00000000285(INSR),ENSOARG00000000286(GOLGA4),ENSOARG00000000336(GCC2),ENSOARG00000000347(TRRAP),ENSOARG00000000356(ZNF746),ENSOARG00000000454(PTPRF),ENSOARG00000000458(SFMBT1),ENSOARG00000000483(NFKB2),ENSOARG00000000569(TNFAIP3),ENSOARG00000000637(EHMT1),ENSOARG00000000732(XPC),ENSOARG00000000742(DNAJA4),ENSOARG00000000770(ZNF202),ENSOA…	ENSOARG00000000291(FGB),ENSOARG00000000417(S100A9),ENSOARG00000000644(FAM83D),ENSOARG00000000678(OTC),ENSOARG00000000783(REM1),ENSOARG00000001001(-),ENSOARG00000001102(KIF2C),ENSOARG00000001111(ID1),ENSOARG00000001113(COL16A1),ENSOARG00000001878(-),ENSOARG00000001908(CSPG4),ENSOARG00000002369(PSMC3IP),ENSOARG00000002486(RRAD),ENSOARG00000002590(SPP1),ENSOARG00000003158(CEP55),ENSOARG00000003263(F…
GO:0008150	Biological Process	GO:0050789	regulation of biological process	446	127	ENSOARG00000000072(FOSL1),ENSOARG00000000096(BCLAF1),ENSOARG00000000285(INSR),ENSOARG00000000286(GOLGA4),ENSOARG00000000336(GCC2),ENSOARG00000000347(TRRAP),ENSOARG00000000356(ZNF746),ENSOARG00000000454(PTPRF),ENSOARG00000000458(SFMBT1),ENSOARG00000000483(NFKB2),ENSOARG00000000569(TNFAIP3),ENSOARG00000000637(EHMT1),ENSOARG00000000732(XPC),ENSOARG00000000742(DNAJA4),ENSOARG00000000770(ZNF202),ENSOA…	ENSOARG00000000291(FGB),ENSOARG00000000417(S100A9),ENSOARG00000000644(FAM83D),ENSOARG00000000783(REM1),ENSOARG00000001001(-),ENSOARG00000001102(KIF2C),ENSOARG00000001111(ID1),ENSOARG00000001113(COL16A1),ENSOARG00000001878(-),ENSOARG00000001908(CSPG4),ENSOARG00000002369(PSMC3IP),ENSOARG00000002486(RRAD),ENSOARG00000002590(SPP1),ENSOARG00000003158(CEP55),ENSOARG00000003263(FAM129A),ENSOARG000000035…
GO:0008150	Biological Process	GO:0048518	positive regulation of biological process	253	67	ENSOARG00000000072(FOSL1),ENSOARG00000000096(BCLAF1),ENSOARG00000000285(INSR),ENSOARG00000000286(GOLGA4),ENSOARG00000000356(ZNF746),ENSOARG00000000483(NFKB2),ENSOARG00000000569(TNFAIP3),ENSOARG00000000873(PRKCG),ENSOARG00000001006(ZBTB1),ENSOARG00000001033(FCHSD1),ENSOARG00000001160(ARAP3),ENSOARG00000001544(RIPK1),ENSOARG00000001576(FGFR1),ENSOARG00000001590(RAI1),ENSOARG00000001610(-),ENSOARG00…	ENSOARG00000000291(FGB),ENSOARG00000000417(S100A9),ENSOARG00000000644(FAM83D),ENSOARG00000001113(COL16A1),ENSOARG00000001908(CSPG4),ENSOARG00000002369(PSMC3IP),ENSOARG00000002590(SPP1),ENSOARG00000003263(FAM129A),ENSOARG00000003547(MYBL2),ENSOARG00000003603(DPYSL3),ENSOARG00000004078(STRA6),ENSOARG00000004318(CDK1),ENSOARG00000005384(-),ENSOARG00000005490(SLC30A2),ENSOARG00000005777(CCBE1),ENSOAR…
GO:0008150	Biological Process	GO:0048519	negative regulation of biological process	211	60	ENSOARG00000000096(BCLAF1),ENSOARG00000000356(ZNF746),ENSOARG00000000458(SFMBT1),ENSOARG00000000569(TNFAIP3),ENSOARG00000000637(EHMT1),ENSOARG00000000732(XPC),ENSOARG00000000742(DNAJA4),ENSOARG00000000770(ZNF202),ENSOARG00000000873(PRKCG),ENSOARG00000001006(ZBTB1),ENSOARG00000001020(BCOR),ENSOARG00000001034(GCFC2),ENSOARG00000001246(AREL1),ENSOARG00000001507(SETD6),ENSOARG00000001544(RIPK1),ENSOA…	ENSOARG00000000291(FGB),ENSOARG00000000783(REM1),ENSOARG00000001111(ID1),ENSOARG00000001878(-),ENSOARG00000002486(RRAD),ENSOARG00000003263(FAM129A),ENSOARG00000004318(CDK1),ENSOARG00000004421(CDKN2C),ENSOARG00000004756(HAMP),ENSOARG00000005384(-),ENSOARG00000005900(GMNN),ENSOARG00000006251(CD109),ENSOARG00000006889(-),ENSOARG00000007151(TTK),ENSOARG00000007318(ID3),ENSOARG00000007360(DUSP9),ENSOA…
GO:0008150	Biological Process	GO:0008152	metabolic process	443	138	ENSOARG00000000072(FOSL1),ENSOARG00000000096(BCLAF1),ENSOARG00000000099(TOP3A),ENSOARG00000000117(-),ENSOARG00000000155(CPM),ENSOARG00000000285(INSR),ENSOARG00000000307(SMOX),ENSOARG00000000347(TRRAP),ENSOARG00000000356(ZNF746),ENSOARG00000000454(PTPRF),ENSOARG00000000458(SFMBT1),ENSOARG00000000483(NFKB2),ENSOARG00000000491(SRRM2),ENSOARG00000000557(PRPF4B),ENSOARG00000000569(TNFAIP3),ENSOARG0000…	ENSOARG00000000291(FGB),ENSOARG00000000417(S100A9),ENSOARG00000000588(ACOT4),ENSOARG00000000644(FAM83D),ENSOARG00000000678(OTC),ENSOARG00000001111(ID1),ENSOARG00000001878(-),ENSOARG00000001908(CSPG4),ENSOARG00000002369(PSMC3IP),ENSOARG00000002590(SPP1),ENSOARG00000002726(PPCDC),ENSOARG00000002773(GMDS),ENSOARG00000003263(FAM129A),ENSOARG00000003547(MYBL2),ENSOARG00000003708(DEPP1),ENSOARG00000004…
GO:0008150	Biological Process	GO:0032502	developmental process	216	61	ENSOARG00000000072(FOSL1),ENSOARG00000000285(INSR),ENSOARG00000000286(GOLGA4),ENSOARG00000000454(PTPRF),ENSOARG00000000458(SFMBT1),ENSOARG00000000483(NFKB2),ENSOARG00000000569(TNFAIP3),ENSOARG00000000580(FLII),ENSOARG00000000637(EHMT1),ENSOARG00000001006(ZBTB1),ENSOARG00000001020(BCOR),ENSOARG00000001154(EML1),ENSOARG00000001507(SETD6),ENSOARG00000001544(RIPK1),ENSOARG00000001576(FGFR1),ENSOARG00…	ENSOARG00000000474(GJA4),ENSOARG00000000644(FAM83D),ENSOARG00000001111(ID1),ENSOARG00000001908(CSPG4),ENSOARG00000001933(CCDC42),ENSOARG00000003158(CEP55),ENSOARG00000003603(DPYSL3),ENSOARG00000004078(STRA6),ENSOARG00000004318(CDK1),ENSOARG00000005777(CCBE1),ENSOARG00000005900(GMNN),ENSOARG00000006251(CD109),ENSOARG00000006254(DNPH1),ENSOARG00000006370(ASF1B),ENSOARG00000006726(HSPB11),ENSOARG000…
GO:0008150	Biological Process	GO:0009987	cellular process	578	182	ENSOARG00000000072(FOSL1),ENSOARG00000000096(BCLAF1),ENSOARG00000000099(TOP3A),ENSOARG00000000117(-),ENSOARG00000000285(INSR),ENSOARG00000000286(GOLGA4),ENSOARG00000000307(SMOX),ENSOARG00000000336(GCC2),ENSOARG00000000347(TRRAP),ENSOARG00000000356(ZNF746),ENSOARG00000000433(NAP1L5),ENSOARG00000000454(PTPRF),ENSOARG00000000458(SFMBT1),ENSOARG00000000483(NFKB2),ENSOARG00000000491(SRRM2),ENSOARG0000…	ENSOARG00000000291(FGB),ENSOARG00000000417(S100A9),ENSOARG00000000474(GJA4),ENSOARG00000000588(ACOT4),ENSOARG00000000644(FAM83D),ENSOARG00000000647(-),ENSOARG00000000678(OTC),ENSOARG00000000783(REM1),ENSOARG00000000888(XAF1),ENSOARG00000001001(-),ENSOARG00000001102(KIF2C),ENSOARG00000001111(ID1),ENSOARG00000001113(COL16A1),ENSOARG00000001878(-),ENSOARG00000001908(CSPG4),ENSOARG00000001920(-),ENSO…
GO:0008150	Biological Process	GO:0044699	single-organism process	486	171	ENSOARG00000000072(FOSL1),ENSOARG00000000096(BCLAF1),ENSOARG00000000099(TOP3A),ENSOARG00000000285(INSR),ENSOARG00000000286(GOLGA4),ENSOARG00000000307(SMOX),ENSOARG00000000336(GCC2),ENSOARG00000000347(TRRAP),ENSOARG00000000356(ZNF746),ENSOARG00000000454(PTPRF),ENSOARG00000000458(SFMBT1),ENSOARG00000000483(NFKB2),ENSOARG00000000569(TNFAIP3),ENSOARG00000000580(FLII),ENSOARG00000000637(EHMT1),ENSOARG…	ENSOARG00000000291(FGB),ENSOARG00000000417(S100A9),ENSOARG00000000474(GJA4),ENSOARG00000000588(ACOT4),ENSOARG00000000644(FAM83D),ENSOARG00000000647(-),ENSOARG00000000678(OTC),ENSOARG00000000783(REM1),ENSOARG00000000888(XAF1),ENSOARG00000001001(-),ENSOARG00000001102(KIF2C),ENSOARG00000001111(ID1),ENSOARG00000001113(COL16A1),ENSOARG00000001908(CSPG4),ENSOARG00000001920(-),ENSOARG00000001933(CCDC42)…
GO:0008150	Biological Process	GO:0040011	locomotion	75	20	ENSOARG00000000285(INSR),ENSOARG00000000454(PTPRF),ENSOARG00000001576(FGFR1),ENSOARG00000001700(PLCG1),ENSOARG00000002034(FLCN),ENSOARG00000002738(MTOR),ENSOARG00000002971(PHACTR4),ENSOARG00000003418(PTK2),ENSOARG00000003455(CDH1),ENSOARG00000003763(AGO2),ENSOARG00000003926(CARMIL1),ENSOARG00000004154(PEX5),ENSOARG00000004448(ASH1L),ENSOARG00000005093(ARHGEF2),ENSOARG00000005177(SLK),ENSOARG00000…	ENSOARG00000000417(S100A9),ENSOARG00000000644(FAM83D),ENSOARG00000001908(CSPG4),ENSOARG00000003603(DPYSL3),ENSOARG00000005777(CCBE1),ENSOARG00000011387(ENG),ENSOARG00000012584(COL18A1),ENSOARG00000012673(RCAN1),ENSOARG00000013956(LGALS1),ENSOARG00000014713(ASPM),ENSOARG00000014989(-),ENSOARG00000015180(BAMBI),ENSOARG00000015279(GAS8),ENSOARG00000015737(DCN),ENSOARG00000016116(KIF14),ENSOARG000000…
GO:0008150	Biological Process	GO:0040007	growth	43	10	ENSOARG00000000285(INSR),ENSOARG00000000286(GOLGA4),ENSOARG00000001576(FGFR1),ENSOARG00000001590(RAI1),ENSOARG00000002034(FLCN),ENSOARG00000002683(SQSTM1),ENSOARG00000002738(MTOR),ENSOARG00000003418(PTK2),ENSOARG00000004037(ADNP2),ENSOARG00000004154(PEX5),ENSOARG00000004790(MMP13),ENSOARG00000005790(RDH10),ENSOARG00000006078(COL27A1),ENSOARG00000006286(SGPL1),ENSOARG00000007419(ABL1),ENSOARG00000…	ENSOARG00000004078(STRA6),ENSOARG00000004421(CDKN2C),ENSOARG00000008650(FBP1),ENSOARG00000010165(-),ENSOARG00000014604(IGFBP4),ENSOARG00000014713(ASPM),ENSOARG00000015994(GAL),ENSOARG00000016116(KIF14),ENSOARG00000019421(IGFBP5),ENSOARG00000020836(CCNB2)
GO:0008150	Biological Process	GO:0050896	response to stimulus	292	92	ENSOARG00000000072(FOSL1),ENSOARG00000000096(BCLAF1),ENSOARG00000000285(INSR),ENSOARG00000000454(PTPRF),ENSOARG00000000483(NFKB2),ENSOARG00000000569(TNFAIP3),ENSOARG00000000732(XPC),ENSOARG00000000742(DNAJA4),ENSOARG00000000873(PRKCG),ENSOARG00000001006(ZBTB1),ENSOARG00000001030(ABCD4),ENSOARG00000001160(ARAP3),ENSOARG00000001507(SETD6),ENSOARG00000001544(RIPK1),ENSOARG00000001576(FGFR1),ENSOARG0…	ENSOARG00000000291(FGB),ENSOARG00000000417(S100A9),ENSOARG00000000644(FAM83D),ENSOARG00000000783(REM1),ENSOARG00000000888(XAF1),ENSOARG00000001111(ID1),ENSOARG00000001113(COL16A1),ENSOARG00000001908(CSPG4),ENSOARG00000002486(RRAD),ENSOARG00000002590(SPP1),ENSOARG00000003158(CEP55),ENSOARG00000003263(FAM129A),ENSOARG00000003547(MYBL2),ENSOARG00000003603(DPYSL3),ENSOARG00000004078(STRA6),ENSOARG000…
GO:0008150	Biological Process	GO:0048511	rhythmic process	14	5	ENSOARG00000001590(RAI1),ENSOARG00000002738(MTOR),ENSOARG00000006286(SGPL1),ENSOARG00000006315(SETX),ENSOARG00000007768(HUWE1),ENSOARG00000009415(KDM2A),ENSOARG00000009545(RELB),ENSOARG00000009830(-),ENSOARG00000010234(CCAR2),ENSOARG00000011934(KDM5A),ENSOARG00000014103(NOCT),ENSOARG00000014879(TAF4),ENSOARG00000017943(EP300),ENSOARG00000018911(-)	ENSOARG00000001111(ID1),ENSOARG00000004318(CDK1),ENSOARG00000007318(ID3),ENSOARG00000011967(DBP),ENSOARG00000013966(AFP)
GO:0008150	Biological Process	GO:0051179	localization	213	63	ENSOARG00000000285(INSR),ENSOARG00000000286(GOLGA4),ENSOARG00000000336(GCC2),ENSOARG00000000454(PTPRF),ENSOARG00000000569(TNFAIP3),ENSOARG00000000960(XPO6),ENSOARG00000001030(ABCD4),ENSOARG00000001268(-),ENSOARG00000001512(SCN5A),ENSOARG00000001544(RIPK1),ENSOARG00000001576(FGFR1),ENSOARG00000001700(PLCG1),ENSOARG00000001827(SLC25A29),ENSOARG00000002034(FLCN),ENSOARG00000002200(NUP98),ENSOARG0000…	ENSOARG00000000291(FGB),ENSOARG00000000417(S100A9),ENSOARG00000000644(FAM83D),ENSOARG00000000783(REM1),ENSOARG00000001001(-),ENSOARG00000001102(KIF2C),ENSOARG00000001908(CSPG4),ENSOARG00000001920(-),ENSOARG00000002486(RRAD),ENSOARG00000002590(SPP1),ENSOARG00000003158(CEP55),ENSOARG00000003603(DPYSL3),ENSOARG00000004078(STRA6),ENSOARG00000004318(CDK1),ENSOARG00000004756(HAMP),ENSOARG00000005049(CP…
GO:0008150	Biological Process	GO:0022610	biological adhesion	55	16	ENSOARG00000000454(PTPRF),ENSOARG00000001006(ZBTB1),ENSOARG00000002034(FLCN),ENSOARG00000002608(CITED2),ENSOARG00000002738(MTOR),ENSOARG00000003199(SHC1),ENSOARG00000003418(PTK2),ENSOARG00000003455(CDH1),ENSOARG00000003926(CARMIL1),ENSOARG00000004356(CARD11),ENSOARG00000005177(SLK),ENSOARG00000005263(PLEKHA7),ENSOARG00000006095(MINK1),ENSOARG00000006487(PEAR1),ENSOARG00000007419(ABL1),ENSOARG0000…	ENSOARG00000000291(FGB),ENSOARG00000000417(S100A9),ENSOARG00000001113(COL16A1),ENSOARG00000002412(CDH16),ENSOARG00000002590(SPP1),ENSOARG00000010041(POSTN),ENSOARG00000013956(LGALS1),ENSOARG00000015081(TGFBI),ENSOARG00000016116(KIF14),ENSOARG00000016476(COL3A1),ENSOARG00000016733(FGA),ENSOARG00000019087(EMILIN1),ENSOARG00000019332(CCDC80),ENSOARG00000020422(HES1),ENSOARG00000020710(NID2),ENSOARG0…
GO:0008150	Biological Process	GO:0002376	immune system process	86	16	ENSOARG00000000483(NFKB2),ENSOARG00000000569(TNFAIP3),ENSOARG00000001006(ZBTB1),ENSOARG00000001154(EML1),ENSOARG00000001544(RIPK1),ENSOARG00000001700(PLCG1),ENSOARG00000002034(FLCN),ENSOARG00000002175(DNASE1),ENSOARG00000002293(KMT2E),ENSOARG00000002588(EPG5),ENSOARG00000002608(CITED2),ENSOARG00000002727(SUPT6H),ENSOARG00000002738(MTOR),ENSOARG00000002952(ADAR),ENSOARG00000003666(ASXL1),ENSOARG00…	ENSOARG00000000291(FGB),ENSOARG00000000417(S100A9),ENSOARG00000005384(-),ENSOARG00000006251(CD109),ENSOARG00000010165(-),ENSOARG00000013956(LGALS1),ENSOARG00000014845(ESCO2),ENSOARG00000015241(-),ENSOARG00000016476(COL3A1),ENSOARG00000016733(FGA),ENSOARG00000016828(PLVAP),ENSOARG00000018312(HPX),ENSOARG00000020278(KCNJ8),ENSOARG00000020422(HES1),ENSOARG00000020836(CCNB2),ENSOARG00000021018(-)
GO:0008150	Biological Process	GO:0051704	multi-organism process	71	16	ENSOARG00000000072(FOSL1),ENSOARG00000000285(INSR),ENSOARG00000000569(TNFAIP3),ENSOARG00000001033(FCHSD1),ENSOARG00000002170(UBAP2L),ENSOARG00000002608(CITED2),ENSOARG00000002683(SQSTM1),ENSOARG00000002738(MTOR),ENSOARG00000002952(ADAR),ENSOARG00000003199(SHC1),ENSOARG00000003481(ARID4B),ENSOARG00000003568(AKAP8),ENSOARG00000003613(UBR2),ENSOARG00000003753(PSME4),ENSOARG00000003763(AGO2),ENSOARG0…	ENSOARG00000000291(FGB),ENSOARG00000000417(S100A9),ENSOARG00000001933(CCDC42),ENSOARG00000006726(HSPB11),ENSOARG00000009290(LRG1),ENSOARG00000010165(-),ENSOARG00000013956(LGALS1),ENSOARG00000013966(AFP),ENSOARG00000014713(ASPM),ENSOARG00000014887(NUGGC),ENSOARG00000015241(-),ENSOARG00000016733(FGA),ENSOARG00000018558(MEI1),ENSOARG00000019332(CCDC80),ENSOARG00000019421(IGFBP5),ENSOARG00000020278(K…
GO:0008150	Biological Process	GO:0032501	multicellular organismal process	228	71	ENSOARG00000000072(FOSL1),ENSOARG00000000285(INSR),ENSOARG00000000286(GOLGA4),ENSOARG00000000454(PTPRF),ENSOARG00000000458(SFMBT1),ENSOARG00000000483(NFKB2),ENSOARG00000000569(TNFAIP3),ENSOARG00000000580(FLII),ENSOARG00000000637(EHMT1),ENSOARG00000001006(ZBTB1),ENSOARG00000001020(BCOR),ENSOARG00000001154(EML1),ENSOARG00000001507(SETD6),ENSOARG00000001544(RIPK1),ENSOARG00000001576(FGFR1),ENSOARG00…	ENSOARG00000000291(FGB),ENSOARG00000000474(GJA4),ENSOARG00000000644(FAM83D),ENSOARG00000001111(ID1),ENSOARG00000001908(CSPG4),ENSOARG00000001933(CCDC42),ENSOARG00000002590(SPP1),ENSOARG00000003158(CEP55),ENSOARG00000003603(DPYSL3),ENSOARG00000004078(STRA6),ENSOARG00000004756(HAMP),ENSOARG00000005777(CCBE1),ENSOARG00000005900(GMNN),ENSOARG00000006251(CD109),ENSOARG00000006370(ASF1B),ENSOARG0000000…
GO:0008150	Biological Process	GO:0044848	biological phase	1	1	ENSOARG00000018536(FERMT1)	ENSOARG00000015994(GAL)
GO:0008150	Biological Process	GO:0022414	reproductive process	33	17	ENSOARG00000000072(FOSL1),ENSOARG00000000285(INSR),ENSOARG00000002170(UBAP2L),ENSOARG00000002608(CITED2),ENSOARG00000002738(MTOR),ENSOARG00000003481(ARID4B),ENSOARG00000003613(UBR2),ENSOARG00000003753(PSME4),ENSOARG00000003763(AGO2),ENSOARG00000004275(ARID1A),ENSOARG00000004448(ASH1L),ENSOARG00000005790(RDH10),ENSOARG00000006286(SGPL1),ENSOARG00000006491(BIRC2),ENSOARG00000007592(PTGS2),ENSOARG00…	ENSOARG00000001933(CCDC42),ENSOARG00000002369(PSMC3IP),ENSOARG00000004078(STRA6),ENSOARG00000006726(HSPB11),ENSOARG00000007151(TTK),ENSOARG00000007785(HTRA1),ENSOARG00000008807(E2F8),ENSOARG00000009466(HSD17B2),ENSOARG00000013532(-),ENSOARG00000013966(AFP),ENSOARG00000014713(ASPM),ENSOARG00000017343(PLK1),ENSOARG00000018424(CCNF),ENSOARG00000018558(MEI1),ENSOARG00000019421(IGFBP5),ENSOARG00000020…
GO:0008150	Biological Process	GO:0000003	reproduction	33	17	ENSOARG00000000072(FOSL1),ENSOARG00000000285(INSR),ENSOARG00000002170(UBAP2L),ENSOARG00000002608(CITED2),ENSOARG00000002738(MTOR),ENSOARG00000003481(ARID4B),ENSOARG00000003613(UBR2),ENSOARG00000003753(PSME4),ENSOARG00000003763(AGO2),ENSOARG00000004275(ARID1A),ENSOARG00000004448(ASH1L),ENSOARG00000005790(RDH10),ENSOARG00000006286(SGPL1),ENSOARG00000006491(BIRC2),ENSOARG00000007592(PTGS2),ENSOARG00…	ENSOARG00000001933(CCDC42),ENSOARG00000002369(PSMC3IP),ENSOARG00000004078(STRA6),ENSOARG00000006726(HSPB11),ENSOARG00000007151(TTK),ENSOARG00000007785(HTRA1),ENSOARG00000008807(E2F8),ENSOARG00000009466(HSD17B2),ENSOARG00000013532(-),ENSOARG00000013966(AFP),ENSOARG00000014713(ASPM),ENSOARG00000017343(PLK1),ENSOARG00000018424(CCNF),ENSOARG00000018558(MEI1),ENSOARG00000019421(IGFBP5),ENSOARG00000020…
GO:0008150	Biological Process	GO:0023052	signaling	208	59	ENSOARG00000000096(BCLAF1),ENSOARG00000000285(INSR),ENSOARG00000000483(NFKB2),ENSOARG00000000569(TNFAIP3),ENSOARG00000000873(PRKCG),ENSOARG00000001160(ARAP3),ENSOARG00000001544(RIPK1),ENSOARG00000001576(FGFR1),ENSOARG00000001700(PLCG1),ENSOARG00000002034(FLCN),ENSOARG00000002484(CREBBP),ENSOARG00000002588(EPG5),ENSOARG00000002594(CHM),ENSOARG00000002608(CITED2),ENSOARG00000002683(SQSTM1),ENSOARG0…	ENSOARG00000000291(FGB),ENSOARG00000000417(S100A9),ENSOARG00000000644(FAM83D),ENSOARG00000000783(REM1),ENSOARG00000001111(ID1),ENSOARG00000001908(CSPG4),ENSOARG00000002486(RRAD),ENSOARG00000002590(SPP1),ENSOARG00000003158(CEP55),ENSOARG00000005777(CCBE1),ENSOARG00000006251(CD109),ENSOARG00000006726(HSPB11),ENSOARG00000006779(INHBE),ENSOARG00000007360(DUSP9),ENSOARG00000007637(LMCD1),ENSOARG000000…
GO:0008150	Biological Process	GO:0098754	detoxification	3	1	ENSOARG00000007592(PTGS2),ENSOARG00000010451(-),ENSOARG00000016814(TXNRD1)	ENSOARG00000007965(GPX8)
GO:0008150	Biological Process	GO:0098743	cell aggregation	1	0	ENSOARG00000014240(CCN2)	--
GO:0008150	Biological Process	GO:0007610	behavior	24	3	ENSOARG00000001576(FGFR1),ENSOARG00000002738(MTOR),ENSOARG00000007234(PLK2),ENSOARG00000007985(CIC),ENSOARG00000008849(AGTPBP1),ENSOARG00000009830(-),ENSOARG00000012440(GDF15),ENSOARG00000013122(NLGN2),ENSOARG00000013533(CHRNB1),ENSOARG00000014101(MCOLN3),ENSOARG00000015165(ADAM17),ENSOARG00000016133(NCKAP1L),ENSOARG00000016176(CHD7),ENSOARG00000016181(ITGA5),ENSOARG00000016602(NLGN3),ENSOARG0000…	ENSOARG00000004078(STRA6),ENSOARG00000012673(RCAN1),MSTRG.2726(GLUD1)
GO:0008150	Biological Process	GO:0001906	cell killing	1	1	ENSOARG00000002175(DNASE1)	ENSOARG00000010165(-)
GO:0008150	Biological Process	GO:0099531	presynaptic process involved in synaptic transmission	2	0	ENSOARG00000007782(GIT1),ENSOARG00000016226(ATP2A2)	--
GO:0003674	Molecular Function	GO:0005488	binding	587	156	ENSOARG00000000072(FOSL1),ENSOARG00000000096(BCLAF1),ENSOARG00000000099(TOP3A),ENSOARG00000000155(CPM),ENSOARG00000000285(INSR),ENSOARG00000000286(GOLGA4),ENSOARG00000000336(GCC2),ENSOARG00000000347(TRRAP),ENSOARG00000000356(ZNF746),ENSOARG00000000400(IQCC),ENSOARG00000000454(PTPRF),ENSOARG00000000458(SFMBT1),ENSOARG00000000483(NFKB2),ENSOARG00000000491(SRRM2),ENSOARG00000000557(PRPF4B),ENSOARG00…	ENSOARG00000000291(FGB),ENSOARG00000000417(S100A9),ENSOARG00000000588(ACOT4),ENSOARG00000000644(FAM83D),ENSOARG00000000647(-),ENSOARG00000000678(OTC),ENSOARG00000000783(REM1),ENSOARG00000000888(XAF1),ENSOARG00000001102(KIF2C),ENSOARG00000001111(ID1),ENSOARG00000001113(COL16A1),ENSOARG00000001437(-),ENSOARG00000001878(-),ENSOARG00000001908(CSPG4),ENSOARG00000002412(CDH16),ENSOARG00000002486(RRAD),…
GO:0003674	Molecular Function	GO:0000988	transcription factor activity, protein binding	33	7	ENSOARG00000000347(TRRAP),ENSOARG00000000458(SFMBT1),ENSOARG00000001020(BCOR),ENSOARG00000001621(MED14),ENSOARG00000002200(NUP98),ENSOARG00000002365(USP22),ENSOARG00000002484(CREBBP),ENSOARG00000002608(CITED2),ENSOARG00000003666(ASXL1),ENSOARG00000003774(KMT5A),ENSOARG00000003834(NSD1),ENSOARG00000004747(-),ENSOARG00000005156(ATN1),ENSOARG00000005939(ZBTB18),ENSOARG00000006491(BIRC2),ENSOARG00000…	ENSOARG00000002369(PSMC3IP),ENSOARG00000005900(GMNN),ENSOARG00000007637(LMCD1),ENSOARG00000007916(WWOX),ENSOARG00000008807(E2F8),ENSOARG00000011925(FAM129B),ENSOARG00000014590(CRYM)
GO:0003674	Molecular Function	GO:0098772	molecular function regulator	54	13	ENSOARG00000001160(ARAP3),ENSOARG00000001967(-),ENSOARG00000002034(FLCN),ENSOARG00000002240(FAF2),ENSOARG00000002594(CHM),ENSOARG00000002971(PHACTR4),ENSOARG00000003012(PLEKHG1),ENSOARG00000003154(ARHGAP21),ENSOARG00000003400(RALGAPA2),ENSOARG00000003583(WNK4),ENSOARG00000003753(PSME4),ENSOARG00000004194(TIAM2),ENSOARG00000004199(ANKRD27),ENSOARG00000004819(ARHGEF28),ENSOARG00000005093(ARHGEF2),E…	ENSOARG00000001878(-),ENSOARG00000004421(CDKN2C),ENSOARG00000005384(-),ENSOARG00000005926(PCOLCE2),ENSOARG00000006251(CD109),ENSOARG00000006889(-),ENSOARG00000010574(WFDC1),ENSOARG00000011670(PCSK1N),ENSOARG00000012389(GPRC5B),ENSOARG00000013532(-),ENSOARG00000020542(CDC20),ENSOARG00000020658(TXNIP),MSTRG.8304(--)
GO:0003674	Molecular Function	GO:0045182	translation regulator activity	4	0	ENSOARG00000008716(-),ENSOARG00000009893(LARP1),ENSOARG00000013595(-),ENSOARG00000015785(CYFIP1)	--
GO:0003674	Molecular Function	GO:0003824	catalytic activity	216	87	ENSOARG00000000099(TOP3A),ENSOARG00000000117(-),ENSOARG00000000155(CPM),ENSOARG00000000285(INSR),ENSOARG00000000307(SMOX),ENSOARG00000000454(PTPRF),ENSOARG00000000557(PRPF4B),ENSOARG00000000569(TNFAIP3),ENSOARG00000000637(EHMT1),ENSOARG00000000873(PRKCG),ENSOARG00000001020(BCOR),ENSOARG00000001030(ABCD4),ENSOARG00000001246(AREL1),ENSOARG00000001430(PLPP5),ENSOARG00000001507(SETD6),ENSOARG00000001…	ENSOARG00000000588(ACOT4),ENSOARG00000000647(-),ENSOARG00000000678(OTC),ENSOARG00000000783(REM1),ENSOARG00000001102(KIF2C),ENSOARG00000002486(RRAD),ENSOARG00000002726(PPCDC),ENSOARG00000002773(GMDS),ENSOARG00000003603(DPYSL3),ENSOARG00000004229(PKLR),ENSOARG00000004318(CDK1),ENSOARG00000005049(CP),ENSOARG00000005191(ALKBH6),ENSOARG00000005506(ENO3),ENSOARG00000005591(KIF22),ENSOARG00000005673(TK1…
GO:0003674	Molecular Function	GO:0016209	antioxidant activity	3	1	ENSOARG00000007592(PTGS2),ENSOARG00000010451(-),ENSOARG00000016814(TXNRD1)	ENSOARG00000007965(GPX8)
GO:0003674	Molecular Function	GO:0001071	nucleic acid binding transcription factor activity	35	8	ENSOARG00000000072(FOSL1),ENSOARG00000000483(NFKB2),ENSOARG00000000770(ZNF202),ENSOARG00000001034(GCFC2),ENSOARG00000002608(CITED2),ENSOARG00000005257(GZF1),ENSOARG00000005637(ETV4),ENSOARG00000006012(-),ENSOARG00000007974(-),ENSOARG00000008213(VEZF1),ENSOARG00000008729(ZNF131),ENSOARG00000009545(RELB),ENSOARG00000009999(JUN),ENSOARG00000011157(TFE3),ENSOARG00000011934(KDM5A),ENSOARG00000012001(M…	ENSOARG00000001111(ID1),ENSOARG00000003547(MYBL2),ENSOARG00000007318(ID3),ENSOARG00000008807(E2F8),ENSOARG00000011967(DBP),ENSOARG00000013317(TBX18),ENSOARG00000017214(NR4A1),ENSOARG00000020422(HES1)
GO:0003674	Molecular Function	GO:0042056	chemoattractant activity	1	0	ENSOARG00000019783(SCG2)	--
GO:0003674	Molecular Function	GO:0009055	electron carrier activity	1	0	ENSOARG00000016814(TXNRD1)	--
GO:0003674	Molecular Function	GO:0005215	transporter activity	37	6	ENSOARG00000000960(XPO6),ENSOARG00000001030(ABCD4),ENSOARG00000001512(SCN5A),ENSOARG00000001827(SLC25A29),ENSOARG00000002448(ATP8B2),ENSOARG00000003559(ABCC3),ENSOARG00000003685(SLC4A11),ENSOARG00000003866(SIDT2),ENSOARG00000004234(SLC45A3),ENSOARG00000004674(SLC29A2),ENSOARG00000005118(KCNK12),ENSOARG00000005280(ATP8B1),ENSOARG00000005994(TRPC1),ENSOARG00000007391(ATP11A),ENSOARG00000010284(SLC3…	ENSOARG00000004078(STRA6),ENSOARG00000005490(SLC30A2),ENSOARG00000009838(SLC16A11),ENSOARG00000011928(STEAP2),ENSOARG00000019703(OSCP1),ENSOARG00000020278(KCNJ8)
GO:0003674	Molecular Function	GO:0005198	structural molecule activity	13	10	ENSOARG00000002200(NUP98),ENSOARG00000003474(SPTBN1),ENSOARG00000006078(COL27A1),ENSOARG00000006200(NES),ENSOARG00000008977(NUP188),ENSOARG00000011514(NUP153),ENSOARG00000014988(AHNAK),ENSOARG00000017552(DSP),ENSOARG00000018281(IMPG2),ENSOARG00000018879(TUBA1C),ENSOARG00000020002(-),ENSOARG00000020525(COL4A3),MSTRG.12058(--)	ENSOARG00000000291(FGB),ENSOARG00000012584(COL18A1),ENSOARG00000013739(TUBA8),ENSOARG00000014989(-),ENSOARG00000016476(COL3A1),ENSOARG00000016733(FGA),ENSOARG00000018142(LMNB1),ENSOARG00000019087(EMILIN1),ENSOARG00000020185(DES),ENSOARG00000021018(-)
GO:0003674	Molecular Function	GO:0060089	molecular transducer activity	27	8	ENSOARG00000000285(INSR),ENSOARG00000001268(-),ENSOARG00000001576(FGFR1),ENSOARG00000006261(LRP8),ENSOARG00000006487(PEAR1),ENSOARG00000007465(PLXNA1),ENSOARG00000007771(SEMA4D),ENSOARG00000008212(ITGA2),ENSOARG00000008867(PLAUR),ENSOARG00000009845(OSMR),ENSOARG00000010448(ERBB3),ENSOARG00000010639(ABCA7),ENSOARG00000011288(TLR7),ENSOARG00000011762(NPR2),ENSOARG00000012400(EPHA2),ENSOARG000000127…	ENSOARG00000004078(STRA6),ENSOARG00000012389(GPRC5B),ENSOARG00000015994(GAL),ENSOARG00000017214(NR4A1),ENSOARG00000020278(KCNJ8),MSTRG.11986(--),MSTRG.24555(--),MSTRG.28719(--)
GO:0003674	Molecular Function	GO:0004871	signal transducer activity	23	7	ENSOARG00000000285(INSR),ENSOARG00000001576(FGFR1),ENSOARG00000006487(PEAR1),ENSOARG00000007465(PLXNA1),ENSOARG00000007771(SEMA4D),ENSOARG00000008162(MAP4K3),ENSOARG00000008212(ITGA2),ENSOARG00000008867(PLAUR),ENSOARG00000009845(OSMR),ENSOARG00000010448(ERBB3),ENSOARG00000010639(ABCA7),ENSOARG00000011288(TLR7),ENSOARG00000011762(NPR2),ENSOARG00000012400(EPHA2),ENSOARG00000012783(INPP5K),ENSOARG00…	ENSOARG00000004078(STRA6),ENSOARG00000011387(ENG),ENSOARG00000012389(GPRC5B),ENSOARG00000013869(MAP2K6),ENSOARG00000014989(-),ENSOARG00000015994(GAL),ENSOARG00000017214(NR4A1)
GO:0005575	Cellular Component	GO:0031974	membrane-enclosed lumen	216	50	ENSOARG00000000072(FOSL1),ENSOARG00000000089(GTF3C1),ENSOARG00000000096(BCLAF1),ENSOARG00000000099(TOP3A),ENSOARG00000000285(INSR),ENSOARG00000000307(SMOX),ENSOARG00000000336(GCC2),ENSOARG00000000347(TRRAP),ENSOARG00000000458(SFMBT1),ENSOARG00000000491(SRRM2),ENSOARG00000000557(PRPF4B),ENSOARG00000000580(FLII),ENSOARG00000000637(EHMT1),ENSOARG00000000732(XPC),ENSOARG00000000824(HNRNPDL),ENSOARG00…	ENSOARG00000000417(S100A9),ENSOARG00000000678(OTC),ENSOARG00000001111(ID1),ENSOARG00000002044(PIMREG),ENSOARG00000002369(PSMC3IP),ENSOARG00000003186(CENPT),ENSOARG00000003547(MYBL2),ENSOARG00000004318(CDK1),ENSOARG00000005191(ALKBH6),ENSOARG00000005282(ORC1),ENSOARG00000005591(KIF22),ENSOARG00000005750(CENPH),ENSOARG00000006370(ASF1B),ENSOARG00000006852(NEIL3),ENSOARG00000008368(CENPF),ENSOARG000…
GO:0005575	Cellular Component	GO:0044422	organelle part	320	86	ENSOARG00000000072(FOSL1),ENSOARG00000000089(GTF3C1),ENSOARG00000000096(BCLAF1),ENSOARG00000000099(TOP3A),ENSOARG00000000285(INSR),ENSOARG00000000307(SMOX),ENSOARG00000000336(GCC2),ENSOARG00000000347(TRRAP),ENSOARG00000000458(SFMBT1),ENSOARG00000000491(SRRM2),ENSOARG00000000557(PRPF4B),ENSOARG00000000580(FLII),ENSOARG00000000637(EHMT1),ENSOARG00000000732(XPC),ENSOARG00000000803(MTCL1),ENSOARG0000…	ENSOARG00000000417(S100A9),ENSOARG00000000644(FAM83D),ENSOARG00000000678(OTC),ENSOARG00000001001(-),ENSOARG00000001102(KIF2C),ENSOARG00000001111(ID1),ENSOARG00000002044(PIMREG),ENSOARG00000002369(PSMC3IP),ENSOARG00000003158(CEP55),ENSOARG00000003186(CENPT),ENSOARG00000003547(MYBL2),ENSOARG00000004318(CDK1),ENSOARG00000004359(SKA1),ENSOARG00000005191(ALKBH6),ENSOARG00000005282(ORC1),ENSOARG0000000…
GO:0005575	Cellular Component	GO:0043226	organelle	449	123	ENSOARG00000000072(FOSL1),ENSOARG00000000089(GTF3C1),ENSOARG00000000096(BCLAF1),ENSOARG00000000099(TOP3A),ENSOARG00000000285(INSR),ENSOARG00000000286(GOLGA4),ENSOARG00000000307(SMOX),ENSOARG00000000336(GCC2),ENSOARG00000000347(TRRAP),ENSOARG00000000433(NAP1L5),ENSOARG00000000458(SFMBT1),ENSOARG00000000483(NFKB2),ENSOARG00000000491(SRRM2),ENSOARG00000000557(PRPF4B),ENSOARG00000000569(TNFAIP3),ENSO…	ENSOARG00000000291(FGB),ENSOARG00000000417(S100A9),ENSOARG00000000588(ACOT4),ENSOARG00000000644(FAM83D),ENSOARG00000000678(OTC),ENSOARG00000000888(XAF1),ENSOARG00000001001(-),ENSOARG00000001102(KIF2C),ENSOARG00000001111(ID1),ENSOARG00000002044(PIMREG),ENSOARG00000002369(PSMC3IP),ENSOARG00000002590(SPP1),ENSOARG00000003004(MND1),ENSOARG00000003158(CEP55),ENSOARG00000003186(CENPT),ENSOARG0000000354…
GO:0005575	Cellular Component	GO:0005623	cell	566	155	ENSOARG00000000072(FOSL1),ENSOARG00000000089(GTF3C1),ENSOARG00000000096(BCLAF1),ENSOARG00000000099(TOP3A),ENSOARG00000000285(INSR),ENSOARG00000000286(GOLGA4),ENSOARG00000000307(SMOX),ENSOARG00000000336(GCC2),ENSOARG00000000347(TRRAP),ENSOARG00000000356(ZNF746),ENSOARG00000000433(NAP1L5),ENSOARG00000000454(PTPRF),ENSOARG00000000458(SFMBT1),ENSOARG00000000483(NFKB2),ENSOARG00000000491(SRRM2),ENSOAR…	ENSOARG00000000291(FGB),ENSOARG00000000417(S100A9),ENSOARG00000000474(GJA4),ENSOARG00000000588(ACOT4),ENSOARG00000000644(FAM83D),ENSOARG00000000678(OTC),ENSOARG00000000888(XAF1),ENSOARG00000001001(-),ENSOARG00000001102(KIF2C),ENSOARG00000001111(ID1),ENSOARG00000001908(CSPG4),ENSOARG00000002044(PIMREG),ENSOARG00000002369(PSMC3IP),ENSOARG00000002412(CDH16),ENSOARG00000002590(SPP1),ENSOARG0000000300…
GO:0005575	Cellular Component	GO:0044464	cell part	561	151	ENSOARG00000000072(FOSL1),ENSOARG00000000089(GTF3C1),ENSOARG00000000096(BCLAF1),ENSOARG00000000099(TOP3A),ENSOARG00000000285(INSR),ENSOARG00000000286(GOLGA4),ENSOARG00000000307(SMOX),ENSOARG00000000336(GCC2),ENSOARG00000000347(TRRAP),ENSOARG00000000356(ZNF746),ENSOARG00000000433(NAP1L5),ENSOARG00000000454(PTPRF),ENSOARG00000000458(SFMBT1),ENSOARG00000000483(NFKB2),ENSOARG00000000491(SRRM2),ENSOAR…	ENSOARG00000000291(FGB),ENSOARG00000000417(S100A9),ENSOARG00000000474(GJA4),ENSOARG00000000588(ACOT4),ENSOARG00000000644(FAM83D),ENSOARG00000000678(OTC),ENSOARG00000000888(XAF1),ENSOARG00000001001(-),ENSOARG00000001102(KIF2C),ENSOARG00000001111(ID1),ENSOARG00000001908(CSPG4),ENSOARG00000002044(PIMREG),ENSOARG00000002369(PSMC3IP),ENSOARG00000002412(CDH16),ENSOARG00000002590(SPP1),ENSOARG0000000300…
GO:0005575	Cellular Component	GO:0099512	supramolecular fiber	19	17	ENSOARG00000003472(MARK2),ENSOARG00000003626(NUMA1),ENSOARG00000003926(CARMIL1),ENSOARG00000004913(CAMSAP1),ENSOARG00000005093(ARHGEF2),ENSOARG00000006200(NES),ENSOARG00000006919(KIF2A),ENSOARG00000010288(MAP1A),ENSOARG00000011159(CLIP1),ENSOARG00000012454(MYO1C),ENSOARG00000016130(APC),ENSOARG00000016436(FAM83H),ENSOARG00000016487(NARF),ENSOARG00000016523(CAMSAP2),ENSOARG00000017552(DSP),ENSOARG…	ENSOARG00000001001(-),ENSOARG00000001102(KIF2C),ENSOARG00000004318(CDK1),ENSOARG00000004359(SKA1),ENSOARG00000005591(KIF22),ENSOARG00000009289(CKAP2),ENSOARG00000009637(KIFC1),ENSOARG00000013739(TUBA8),ENSOARG00000014713(ASPM),ENSOARG00000014989(-),ENSOARG00000015279(GAS8),ENSOARG00000015873(KIF20A),ENSOARG00000016116(KIF14),ENSOARG00000017343(PLK1),ENSOARG00000018142(LMNB1),ENSOARG00000020185(DE…
GO:0005575	Cellular Component	GO:0032991	macromolecular complex	198	57	ENSOARG00000000089(GTF3C1),ENSOARG00000000285(INSR),ENSOARG00000000347(TRRAP),ENSOARG00000000483(NFKB2),ENSOARG00000000491(SRRM2),ENSOARG00000000557(PRPF4B),ENSOARG00000000732(XPC),ENSOARG00000000960(XPO6),ENSOARG00000001034(GCFC2),ENSOARG00000001512(SCN5A),ENSOARG00000001523(PHC1),ENSOARG00000001544(RIPK1),ENSOARG00000001576(FGFR1),ENSOARG00000001621(MED14),ENSOARG00000001700(PLCG1),ENSOARG00000…	ENSOARG00000000291(FGB),ENSOARG00000000474(GJA4),ENSOARG00000001102(KIF2C),ENSOARG00000003186(CENPT),ENSOARG00000003547(MYBL2),ENSOARG00000004078(STRA6),ENSOARG00000004318(CDK1),ENSOARG00000004359(SKA1),ENSOARG00000005282(ORC1),ENSOARG00000005506(ENO3),ENSOARG00000005591(KIF22),ENSOARG00000005750(CENPH),ENSOARG00000005886(PFKFB1),ENSOARG00000006370(ASF1B),ENSOARG00000006520(UBE2C),ENSOARG00000006…
GO:0005575	Cellular Component	GO:0030054	cell junction	38	8	ENSOARG00000001700(PLCG1),ENSOARG00000002034(FLCN),ENSOARG00000002860(FHOD1),ENSOARG00000003154(ARHGAP21),ENSOARG00000003418(PTK2),ENSOARG00000003455(CDH1),ENSOARG00000003583(WNK4),ENSOARG00000003763(AGO2),ENSOARG00000005234(RSC1A1),ENSOARG00000005263(PLEKHA7),ENSOARG00000007629(PKP4),ENSOARG00000007782(GIT1),ENSOARG00000008199(PTPRJ),ENSOARG00000008212(ITGA2),ENSOARG00000008398(FAT1),ENSOARG0000…	ENSOARG00000000417(S100A9),ENSOARG00000000474(GJA4),ENSOARG00000005191(ALKBH6),ENSOARG00000005652(CDCA3),ENSOARG00000011925(FAM129B),ENSOARG00000014845(ESCO2),ENSOARG00000018424(CCNF),ENSOARG00000020185(DES)
GO:0005575	Cellular Component	GO:0044421	extracellular region part	20	39	ENSOARG00000000803(MTCL1),ENSOARG00000003763(AGO2),ENSOARG00000006078(COL27A1),ENSOARG00000006315(SETX),ENSOARG00000006829(CENPC),ENSOARG00000007771(SEMA4D),ENSOARG00000010373(MICAL1),ENSOARG00000010448(ERBB3),ENSOARG00000011019(CLCF1),ENSOARG00000012440(GDF15),ENSOARG00000013868(ADNP),ENSOARG00000014988(AHNAK),ENSOARG00000017402(APOB),ENSOARG00000018281(IMPG2),ENSOARG00000018880(MAN2A1),ENSOARG0…	ENSOARG00000000291(FGB),ENSOARG00000000417(S100A9),ENSOARG00000001755(-),ENSOARG00000001878(-),ENSOARG00000002590(SPP1),ENSOARG00000003158(CEP55),ENSOARG00000005049(CP),ENSOARG00000005384(-),ENSOARG00000005777(CCBE1),ENSOARG00000006251(CD109),ENSOARG00000006889(-),ENSOARG00000009290(LRG1),ENSOARG00000009464(-),ENSOARG00000009865(-),ENSOARG00000010165(-),ENSOARG00000011122(CLEC3B),ENSOARG000000113…
GO:0005575	Cellular Component	GO:0031012	extracellular matrix	7	10	ENSOARG00000004790(MMP13),ENSOARG00000006078(COL27A1),ENSOARG00000010519(OLFML2B),ENSOARG00000014240(CCN2),ENSOARG00000018281(IMPG2),ENSOARG00000020058(THBS1),ENSOARG00000020525(COL4A3)	ENSOARG00000005777(CCBE1),ENSOARG00000010041(POSTN),ENSOARG00000012584(COL18A1),ENSOARG00000015081(TGFBI),ENSOARG00000016476(COL3A1),ENSOARG00000018248(MFAP4),ENSOARG00000019087(EMILIN1),ENSOARG00000019332(CCDC80),ENSOARG00000020710(NID2),ENSOARG00000021018(-)
GO:0005575	Cellular Component	GO:0044420	extracellular matrix component	2	6	ENSOARG00000006078(COL27A1),ENSOARG00000020525(COL4A3)	ENSOARG00000012584(COL18A1),ENSOARG00000016476(COL3A1),ENSOARG00000018248(MFAP4),ENSOARG00000019332(CCDC80),ENSOARG00000020710(NID2),ENSOARG00000021018(-)
GO:0005575	Cellular Component	GO:0005576	extracellular region	23	45	ENSOARG00000000803(MTCL1),ENSOARG00000003763(AGO2),ENSOARG00000004790(MMP13),ENSOARG00000006078(COL27A1),ENSOARG00000006315(SETX),ENSOARG00000006829(CENPC),ENSOARG00000007771(SEMA4D),ENSOARG00000010373(MICAL1),ENSOARG00000010448(ERBB3),ENSOARG00000011019(CLCF1),ENSOARG00000012440(GDF15),ENSOARG00000013868(ADNP),ENSOARG00000014240(CCN2),ENSOARG00000014988(AHNAK),ENSOARG00000017402(APOB),ENSOARG000…	ENSOARG00000000291(FGB),ENSOARG00000000417(S100A9),ENSOARG00000001755(-),ENSOARG00000001878(-),ENSOARG00000002590(SPP1),ENSOARG00000003158(CEP55),ENSOARG00000004756(HAMP),ENSOARG00000005049(CP),ENSOARG00000005384(-),ENSOARG00000005777(CCBE1),ENSOARG00000005926(PCOLCE2),ENSOARG00000006251(CD109),ENSOARG00000006779(INHBE),ENSOARG00000006889(-),ENSOARG00000009290(LRG1),ENSOARG00000009464(-),ENSOARG0…
GO:0005575	Cellular Component	GO:0045202	synapse	21	3	ENSOARG00000003474(SPTBN1),ENSOARG00000005093(ARHGEF2),ENSOARG00000007629(PKP4),ENSOARG00000008880(SH2D5),ENSOARG00000009476(DLG5),ENSOARG00000010183(CTTNBP2),ENSOARG00000010373(MICAL1),ENSOARG00000012066(SEMA4B),ENSOARG00000012786(ABHD17B),ENSOARG00000013122(NLGN2),ENSOARG00000013414(SYNJ1),ENSOARG00000013533(CHRNB1),ENSOARG00000013713(SEMA4C),ENSOARG00000015785(CYFIP1),ENSOARG00000016181(ITGA5)…	ENSOARG00000000291(FGB),ENSOARG00000016733(FGA),ENSOARG00000020185(DES)
GO:0005575	Cellular Component	GO:0044456	synapse part	17	0	ENSOARG00000003474(SPTBN1),ENSOARG00000005093(ARHGEF2),ENSOARG00000007629(PKP4),ENSOARG00000008880(SH2D5),ENSOARG00000009476(DLG5),ENSOARG00000010183(CTTNBP2),ENSOARG00000010373(MICAL1),ENSOARG00000012786(ABHD17B),ENSOARG00000013414(SYNJ1),ENSOARG00000013533(CHRNB1),ENSOARG00000013713(SEMA4C),ENSOARG00000015785(CYFIP1),ENSOARG00000016602(NLGN3),ENSOARG00000016848(GABBR1),ENSOARG00000017641(BMPR2)…	--
GO:0005575	Cellular Component	GO:0016020	membrane	231	55	ENSOARG00000000285(INSR),ENSOARG00000000307(SMOX),ENSOARG00000000454(PTPRF),ENSOARG00000000732(XPC),ENSOARG00000000742(DNAJA4),ENSOARG00000000813(-),ENSOARG00000000960(XPO6),ENSOARG00000001006(ZBTB1),ENSOARG00000001030(ABCD4),ENSOARG00000001268(-),ENSOARG00000001430(PLPP5),ENSOARG00000001512(SCN5A),ENSOARG00000001544(RIPK1),ENSOARG00000001576(FGFR1),ENSOARG00000001700(PLCG1),ENSOARG00000001827(SL…	ENSOARG00000000291(FGB),ENSOARG00000000474(GJA4),ENSOARG00000000678(OTC),ENSOARG00000000783(REM1),ENSOARG00000001908(CSPG4),ENSOARG00000001920(-),ENSOARG00000002412(CDH16),ENSOARG00000002486(RRAD),ENSOARG00000003158(CEP55),ENSOARG00000003263(FAM129A),ENSOARG00000003430(PDZK1IP1),ENSOARG00000003676(-),ENSOARG00000004078(STRA6),ENSOARG00000005282(ORC1),ENSOARG00000005490(SLC30A2),ENSOARG00000005506…
GO:0005575	Cellular Component	GO:0044425	membrane part	155	30	ENSOARG00000000285(INSR),ENSOARG00000000454(PTPRF),ENSOARG00000000813(-),ENSOARG00000001030(ABCD4),ENSOARG00000001430(PLPP5),ENSOARG00000001512(SCN5A),ENSOARG00000001544(RIPK1),ENSOARG00000001576(FGFR1),ENSOARG00000001827(SLC25A29),ENSOARG00000002240(FAF2),ENSOARG00000002448(ATP8B2),ENSOARG00000002610(RETREG3),ENSOARG00000002688(ANK1),ENSOARG00000003418(PTK2),ENSOARG00000003455(CDH1),ENSOARG00000…	ENSOARG00000000291(FGB),ENSOARG00000000474(GJA4),ENSOARG00000001908(CSPG4),ENSOARG00000001920(-),ENSOARG00000002412(CDH16),ENSOARG00000003430(PDZK1IP1),ENSOARG00000003676(-),ENSOARG00000004078(STRA6),ENSOARG00000005490(SLC30A2),ENSOARG00000007965(GPX8),ENSOARG00000009466(HSD17B2),ENSOARG00000009541(-),ENSOARG00000009838(SLC16A11),ENSOARG00000011329(-),ENSOARG00000011387(ENG),ENSOARG00000011928(ST…
