# Supplementary material for: Vitamin E Can Ameliorate Oxidative Damage of Ovine Hepatocytes In Vitro by Regulating Genes Expression Associated with Apoptosis and Pyroptosis, but Not Ferroptosis
Source: Molecules. 2021 Jul 27;26(15):4520. doi: 10.3390/molecules26154520 (PMC8348559; doi:10.3390/molecules26154520)
Supplement: Supplementary file 1 [file molecules-26-04520-s001.zip › Supplementary File 2.xls]

GO ID (level1)	GO Term (level1)	GO ID (level2)	GO Term (level2)	number_of_C1-vs-T1 (up)	number_of_C1-vs-T1 (down)	Genes_of_C1-vs-T1_up	Genes_of_C1-vs-T1_down
GO:0008150	Biological Process	GO:0071840	cellular component organization or biogenesis	585	30	ENSOARG00000000082(MARCH5),ENSOARG00000000090(AP1M1),ENSOARG00000000161(-),ENSOARG00000000285(INSR),ENSOARG00000000321(IDE),ENSOARG00000000358(PSEN1),ENSOARG00000000433(NAP1L5),ENSOARG00000000446(LIMS1),ENSOARG00000000454(PTPRF),ENSOARG00000000460(WAPL),ENSOARG00000000479(TTC17),ENSOARG00000000488(RPTOR),ENSOARG00000000519(PCDHGC3),ENSOARG00000000612(PERP),ENSOARG00000000619(RAB8A),ENSOARG0000000…	ENSOARG00000000023(COX3),ENSOARG00000001111(ID1),ENSOARG00000001369(UBE2S),ENSOARG00000002264(RAD54L),ENSOARG00000002756(-),ENSOARG00000003022(ATP5IF1),ENSOARG00000003186(CENPT),ENSOARG00000005411(NDUFB7),ENSOARG00000005750(CENPH),ENSOARG00000009232(PFDN6),ENSOARG00000009808(APOA2),ENSOARG00000010039(AKAP4),ENSOARG00000013108(CHCHD10),ENSOARG00000013331(PAXBP1),ENSOARG00000013447(SYCE1),ENSOARG00…
GO:0008150	Biological Process	GO:0051179	localization	574	39	ENSOARG00000000043(RAB11FIP2),ENSOARG00000000082(MARCH5),ENSOARG00000000090(AP1M1),ENSOARG00000000123(-),ENSOARG00000000197(VPS50),ENSOARG00000000285(INSR),ENSOARG00000000358(PSEN1),ENSOARG00000000420(NDFIP2),ENSOARG00000000446(LIMS1),ENSOARG00000000454(PTPRF),ENSOARG00000000460(WAPL),ENSOARG00000000569(TNFAIP3),ENSOARG00000000582(SLC25A53),ENSOARG00000000619(RAB8A),ENSOARG00000000636(DIAPH1),ENS…	ENSOARG00000000019(COX2),ENSOARG00000000022(ATP6),ENSOARG00000000023(COX3),ENSOARG00000000417(S100A9),ENSOARG00000000674(S100A2),ENSOARG00000000783(REM1),ENSOARG00000001207(SLC22A14),ENSOARG00000001737(-),ENSOARG00000001926(SLC17A3),ENSOARG00000002387(TRAPPC5),ENSOARG00000002756(-),ENSOARG00000003022(ATP5IF1),ENSOARG00000003996(-),ENSOARG00000004078(STRA6),ENSOARG00000004756(HAMP),ENSOARG00000006…
GO:0008150	Biological Process	GO:0048518	positive regulation of biological process	548	29	ENSOARG00000000082(MARCH5),ENSOARG00000000285(INSR),ENSOARG00000000321(IDE),ENSOARG00000000357(NCOR2),ENSOARG00000000358(PSEN1),ENSOARG00000000420(NDFIP2),ENSOARG00000000446(LIMS1),ENSOARG00000000460(WAPL),ENSOARG00000000469(SP3),ENSOARG00000000488(RPTOR),ENSOARG00000000495(CCNK),ENSOARG00000000536(AGPAT1),ENSOARG00000000569(TNFAIP3),ENSOARG00000000570(-),ENSOARG00000000612(PERP),ENSOARG000000006…	ENSOARG00000000417(S100A9),ENSOARG00000000432(S100A12),ENSOARG00000000606(MUSTN1),ENSOARG00000001078(-),ENSOARG00000001369(UBE2S),ENSOARG00000001560(ARHGAP22),ENSOARG00000003022(ATP5IF1),ENSOARG00000003996(-),ENSOARG00000004078(STRA6),ENSOARG00000007233(ISG15),ENSOARG00000009808(APOA2),ENSOARG00000011012(C5AR2),ENSOARG00000012323(ACAP1),ENSOARG00000013096(IL18R1),ENSOARG00000013108(CHCHD10),ENSOA…
GO:0008150	Biological Process	GO:0032502	developmental process	504	29	ENSOARG00000000082(MARCH5),ENSOARG00000000090(AP1M1),ENSOARG00000000285(INSR),ENSOARG00000000321(IDE),ENSOARG00000000358(PSEN1),ENSOARG00000000446(LIMS1),ENSOARG00000000454(PTPRF),ENSOARG00000000469(SP3),ENSOARG00000000569(TNFAIP3),ENSOARG00000000612(PERP),ENSOARG00000000619(RAB8A),ENSOARG00000000636(DIAPH1),ENSOARG00000000637(EHMT1),ENSOARG00000000651(BMPR1A),ENSOARG00000000744(LAMC2),ENSOARG000…	ENSOARG00000000474(GJA4),ENSOARG00000000606(MUSTN1),ENSOARG00000001111(ID1),ENSOARG00000001436(TMEM190),ENSOARG00000001811(-),ENSOARG00000002264(RAD54L),ENSOARG00000003022(ATP5IF1),ENSOARG00000003996(-),ENSOARG00000004078(STRA6),ENSOARG00000007233(ISG15),ENSOARG00000008321(EVPL),ENSOARG00000010039(AKAP4),ENSOARG00000011122(CLEC3B),ENSOARG00000012365(INKA1),ENSOARG00000013096(IL18R1),ENSOARG000000…
GO:0008150	Biological Process	GO:0044699	single-organism process	1175	94	ENSOARG00000000043(RAB11FIP2),ENSOARG00000000082(MARCH5),ENSOARG00000000090(AP1M1),ENSOARG00000000123(-),ENSOARG00000000161(-),ENSOARG00000000187(API5),ENSOARG00000000197(VPS50),ENSOARG00000000285(INSR),ENSOARG00000000321(IDE),ENSOARG00000000357(NCOR2),ENSOARG00000000358(PSEN1),ENSOARG00000000420(NDFIP2),ENSOARG00000000446(LIMS1),ENSOARG00000000454(PTPRF),ENSOARG00000000460(WAPL),ENSOARG000000004…	ENSOARG00000000010(ND2),ENSOARG00000000019(COX2),ENSOARG00000000022(ATP6),ENSOARG00000000023(COX3),ENSOARG00000000025(ND3),ENSOARG00000000033(ND6),ENSOARG00000000035(CYTB),ENSOARG00000000417(S100A9),ENSOARG00000000432(S100A12),ENSOARG00000000474(GJA4),ENSOARG00000000606(MUSTN1),ENSOARG00000000674(S100A2),ENSOARG00000000783(REM1),ENSOARG00000001078(-),ENSOARG00000001111(ID1),ENSOARG00000001207(SLC…
GO:0008150	Biological Process	GO:0040011	locomotion	182	10	ENSOARG00000000123(-),ENSOARG00000000285(INSR),ENSOARG00000000358(PSEN1),ENSOARG00000000454(PTPRF),ENSOARG00000000651(BMPR1A),ENSOARG00000000744(LAMC2),ENSOARG00000000778(MET),ENSOARG00000001031(MYD88),ENSOARG00000001290(PEX13),ENSOARG00000001311(NDEL1),ENSOARG00000001379(CAV2),ENSOARG00000001529(TRIM8),ENSOARG00000001700(PLCG1),ENSOARG00000001750(PEAK1),ENSOARG00000001816(ADAM9),ENSOARG000000018…	ENSOARG00000000417(S100A9),ENSOARG00000000674(S100A2),ENSOARG00000010039(AKAP4),ENSOARG00000010849(CATSPER2),ENSOARG00000011012(C5AR2),ENSOARG00000013956(LGALS1),ENSOARG00000015856(IGF1),ENSOARG00000016116(KIF14),ENSOARG00000016593(ARRDC3),ENSOARG00000019394(CFAP44)
GO:0008150	Biological Process	GO:0022610	biological adhesion	150	6	ENSOARG00000000358(PSEN1),ENSOARG00000000446(LIMS1),ENSOARG00000000454(PTPRF),ENSOARG00000000469(SP3),ENSOARG00000000519(PCDHGC3),ENSOARG00000000612(PERP),ENSOARG00000000948(HSD17B12),ENSOARG00000001006(ZBTB1),ENSOARG00000001037(TWSG1),ENSOARG00000001148(HFE),ENSOARG00000001308(PCDH1),ENSOARG00000001463(-),ENSOARG00000001750(PEAK1),ENSOARG00000001816(ADAM9),ENSOARG00000002034(FLCN),ENSOARG0000000…	ENSOARG00000000417(S100A9),ENSOARG00000011997(UBA7),ENSOARG00000013096(IL18R1),ENSOARG00000013956(LGALS1),ENSOARG00000015856(IGF1),ENSOARG00000016116(KIF14)
GO:0008150	Biological Process	GO:0048519	negative regulation of biological process	420	21	ENSOARG00000000082(MARCH5),ENSOARG00000000161(-),ENSOARG00000000187(API5),ENSOARG00000000357(NCOR2),ENSOARG00000000358(PSEN1),ENSOARG00000000420(NDFIP2),ENSOARG00000000446(LIMS1),ENSOARG00000000460(WAPL),ENSOARG00000000469(SP3),ENSOARG00000000488(RPTOR),ENSOARG00000000495(CCNK),ENSOARG00000000569(TNFAIP3),ENSOARG00000000570(-),ENSOARG00000000636(DIAPH1),ENSOARG00000000637(EHMT1),ENSOARG0000000065…	ENSOARG00000000736(PKMYT1),ENSOARG00000000783(REM1),ENSOARG00000001111(ID1),ENSOARG00000001811(-),ENSOARG00000002756(-),ENSOARG00000003022(ATP5IF1),ENSOARG00000004756(HAMP),ENSOARG00000007233(ISG15),ENSOARG00000009808(APOA2),ENSOARG00000010869(NPAS1),ENSOARG00000011012(C5AR2),ENSOARG00000012365(INKA1),ENSOARG00000013512(CDT1),ENSOARG00000015856(IGF1),ENSOARG00000015994(GAL),ENSOARG00000016116(KIF…
GO:0008150	Biological Process	GO:0040007	growth	98	7	ENSOARG00000000285(INSR),ENSOARG00000000488(RPTOR),ENSOARG00000000651(BMPR1A),ENSOARG00000001031(MYD88),ENSOARG00000001311(NDEL1),ENSOARG00000001371(DHCR7),ENSOARG00000001590(RAI1),ENSOARG00000001873(WDR48),ENSOARG00000002034(FLCN),ENSOARG00000002627(ATRN),ENSOARG00000002683(SQSTM1),ENSOARG00000002738(MTOR),ENSOARG00000002885(CTNNB1),ENSOARG00000002894(RTN4),ENSOARG00000003418(PTK2),ENSOARG000000…	ENSOARG00000000606(MUSTN1),ENSOARG00000004078(STRA6),ENSOARG00000015856(IGF1),ENSOARG00000015994(GAL),ENSOARG00000016116(KIF14),ENSOARG00000018341(-),ENSOARG00000018857(SLC1A2)
GO:0008150	Biological Process	GO:0002376	immune system process	197	11	ENSOARG00000000123(-),ENSOARG00000000358(PSEN1),ENSOARG00000000469(SP3),ENSOARG00000000490(TXLNA),ENSOARG00000000569(TNFAIP3),ENSOARG00000000651(BMPR1A),ENSOARG00000000900(GCNT3),ENSOARG00000000939(MAVS),ENSOARG00000001006(ZBTB1),ENSOARG00000001031(MYD88),ENSOARG00000001037(TWSG1),ENSOARG00000001148(HFE),ENSOARG00000001154(EML1),ENSOARG00000001463(-),ENSOARG00000001529(TRIM8),ENSOARG00000001667(E…	ENSOARG00000000417(S100A9),ENSOARG00000001436(TMEM190),ENSOARG00000003022(ATP5IF1),ENSOARG00000007233(ISG15),ENSOARG00000007866(PSMB9),ENSOARG00000009808(APOA2),ENSOARG00000011012(C5AR2),ENSOARG00000013096(IL18R1),ENSOARG00000013956(LGALS1),ENSOARG00000015856(IGF1),ENSOARG00000018312(HPX)
GO:0008150	Biological Process	GO:0050896	response to stimulus	654	50	ENSOARG00000000043(RAB11FIP2),ENSOARG00000000090(AP1M1),ENSOARG00000000123(-),ENSOARG00000000285(INSR),ENSOARG00000000357(NCOR2),ENSOARG00000000358(PSEN1),ENSOARG00000000446(LIMS1),ENSOARG00000000454(PTPRF),ENSOARG00000000460(WAPL),ENSOARG00000000488(RPTOR),ENSOARG00000000495(CCNK),ENSOARG00000000569(TNFAIP3),ENSOARG00000000612(PERP),ENSOARG00000000636(DIAPH1),ENSOARG00000000651(BMPR1A),ENSOARG00…	ENSOARG00000000417(S100A9),ENSOARG00000000432(S100A12),ENSOARG00000000606(MUSTN1),ENSOARG00000000783(REM1),ENSOARG00000001078(-),ENSOARG00000001111(ID1),ENSOARG00000001560(ARHGAP22),ENSOARG00000001811(-),ENSOARG00000001926(SLC17A3),ENSOARG00000002264(RAD54L),ENSOARG00000002756(-),ENSOARG00000003022(ATP5IF1),ENSOARG00000003557(EFHC2),ENSOARG00000004078(STRA6),ENSOARG00000004749(ARHGEF9),ENSOARG000…
GO:0008150	Biological Process	GO:0051704	multi-organism process	157	11	ENSOARG00000000285(INSR),ENSOARG00000000469(SP3),ENSOARG00000000495(CCNK),ENSOARG00000000569(TNFAIP3),ENSOARG00000000939(MAVS),ENSOARG00000001031(MYD88),ENSOARG00000001166(NRIP1),ENSOARG00000001290(PEX13),ENSOARG00000001379(CAV2),ENSOARG00000001468(MAPK8),ENSOARG00000001529(TRIM8),ENSOARG00000001784(PRDX3),ENSOARG00000001816(ADAM9),ENSOARG00000001873(WDR48),ENSOARG00000001899(PUM1),ENSOARG0000000…	ENSOARG00000000417(S100A9),ENSOARG00000000432(S100A12),ENSOARG00000007233(ISG15),ENSOARG00000010869(NPAS1),ENSOARG00000013269(LEAP2),ENSOARG00000013956(LGALS1),ENSOARG00000014753(ROMO1),ENSOARG00000015308(CNBD2),ENSOARG00000015856(IGF1),ENSOARG00000018558(MEI1),ENSOARG00000019394(CFAP44)
GO:0008150	Biological Process	GO:0065007	biological regulation	935	60	ENSOARG00000000043(RAB11FIP2),ENSOARG00000000082(MARCH5),ENSOARG00000000123(-),ENSOARG00000000147(ZNF282),ENSOARG00000000161(-),ENSOARG00000000187(API5),ENSOARG00000000285(INSR),ENSOARG00000000321(IDE),ENSOARG00000000357(NCOR2),ENSOARG00000000358(PSEN1),ENSOARG00000000420(NDFIP2),ENSOARG00000000446(LIMS1),ENSOARG00000000454(PTPRF),ENSOARG00000000460(WAPL),ENSOARG00000000469(SP3),ENSOARG0000000048…	ENSOARG00000000417(S100A9),ENSOARG00000000432(S100A12),ENSOARG00000000606(MUSTN1),ENSOARG00000000736(PKMYT1),ENSOARG00000000783(REM1),ENSOARG00000001078(-),ENSOARG00000001111(ID1),ENSOARG00000001369(UBE2S),ENSOARG00000001560(ARHGAP22),ENSOARG00000001811(-),ENSOARG00000002756(-),ENSOARG00000003022(ATP5IF1),ENSOARG00000003708(DEPP1),ENSOARG00000003923(TLE7),ENSOARG00000003996(-),ENSOARG00000004078(…
GO:0008150	Biological Process	GO:0008152	metabolic process	930	87	ENSOARG00000000082(MARCH5),ENSOARG00000000103(-),ENSOARG00000000117(-),ENSOARG00000000147(ZNF282),ENSOARG00000000155(CPM),ENSOARG00000000285(INSR),ENSOARG00000000321(IDE),ENSOARG00000000357(NCOR2),ENSOARG00000000358(PSEN1),ENSOARG00000000420(NDFIP2),ENSOARG00000000446(LIMS1),ENSOARG00000000454(PTPRF),ENSOARG00000000460(WAPL),ENSOARG00000000469(SP3),ENSOARG00000000488(RPTOR),ENSOARG00000000491(SRR…	ENSOARG00000000010(ND2),ENSOARG00000000019(COX2),ENSOARG00000000022(ATP6),ENSOARG00000000023(COX3),ENSOARG00000000025(ND3),ENSOARG00000000033(ND6),ENSOARG00000000035(CYTB),ENSOARG00000000417(S100A9),ENSOARG00000000432(S100A12),ENSOARG00000000606(MUSTN1),ENSOARG00000000736(PKMYT1),ENSOARG00000001078(-),ENSOARG00000001111(ID1),ENSOARG00000001369(UBE2S),ENSOARG00000001560(ARHGAP22),ENSOARG0000000175…
GO:0008150	Biological Process	GO:0032501	multicellular organismal process	526	38	ENSOARG00000000285(INSR),ENSOARG00000000321(IDE),ENSOARG00000000358(PSEN1),ENSOARG00000000454(PTPRF),ENSOARG00000000469(SP3),ENSOARG00000000536(AGPAT1),ENSOARG00000000569(TNFAIP3),ENSOARG00000000612(PERP),ENSOARG00000000637(EHMT1),ENSOARG00000000651(BMPR1A),ENSOARG00000000744(LAMC2),ENSOARG00000000778(MET),ENSOARG00000000840(HPS4),ENSOARG00000000900(GCNT3),ENSOARG00000000939(MAVS),ENSOARG00000000…	ENSOARG00000000474(GJA4),ENSOARG00000000606(MUSTN1),ENSOARG00000000674(S100A2),ENSOARG00000001111(ID1),ENSOARG00000001436(TMEM190),ENSOARG00000001548(CRYBB1),ENSOARG00000001811(-),ENSOARG00000002264(RAD54L),ENSOARG00000002756(-),ENSOARG00000003022(ATP5IF1),ENSOARG00000003996(-),ENSOARG00000004078(STRA6),ENSOARG00000004756(HAMP),ENSOARG00000007233(ISG15),ENSOARG00000009808(APOA2),ENSOARG0000001086…
GO:0008150	Biological Process	GO:0009987	cellular process	1283	111	ENSOARG00000000043(RAB11FIP2),ENSOARG00000000082(MARCH5),ENSOARG00000000090(AP1M1),ENSOARG00000000103(-),ENSOARG00000000117(-),ENSOARG00000000123(-),ENSOARG00000000147(ZNF282),ENSOARG00000000161(-),ENSOARG00000000187(API5),ENSOARG00000000285(INSR),ENSOARG00000000321(IDE),ENSOARG00000000357(NCOR2),ENSOARG00000000358(PSEN1),ENSOARG00000000420(NDFIP2),ENSOARG00000000433(NAP1L5),ENSOARG00000000446(LI…	ENSOARG00000000010(ND2),ENSOARG00000000019(COX2),ENSOARG00000000022(ATP6),ENSOARG00000000023(COX3),ENSOARG00000000035(CYTB),ENSOARG00000000417(S100A9),ENSOARG00000000432(S100A12),ENSOARG00000000474(GJA4),ENSOARG00000000606(MUSTN1),ENSOARG00000000674(S100A2),ENSOARG00000000736(PKMYT1),ENSOARG00000000783(REM1),ENSOARG00000001078(-),ENSOARG00000001111(ID1),ENSOARG00000001207(SLC22A14),ENSOARG0000000…
GO:0008150	Biological Process	GO:0048511	rhythmic process	28	1	ENSOARG00000001166(NRIP1),ENSOARG00000001590(RAI1),ENSOARG00000002738(MTOR),ENSOARG00000003928(HNF4A),ENSOARG00000004175(FZD4),ENSOARG00000004233(PML),ENSOARG00000004500(NAMPT),ENSOARG00000004662(SMAD4),ENSOARG00000006286(SGPL1),ENSOARG00000007580(PLEKHA1),ENSOARG00000007840(BHLHE40),ENSOARG00000009415(KDM2A),ENSOARG00000009830(-),ENSOARG00000010741(FOXO3),ENSOARG00000011716(DDB1),ENSOARG00000011…	ENSOARG00000001111(ID1)
GO:0008150	Biological Process	GO:0050789	regulation of biological process	885	59	ENSOARG00000000082(MARCH5),ENSOARG00000000123(-),ENSOARG00000000147(ZNF282),ENSOARG00000000161(-),ENSOARG00000000187(API5),ENSOARG00000000285(INSR),ENSOARG00000000321(IDE),ENSOARG00000000357(NCOR2),ENSOARG00000000358(PSEN1),ENSOARG00000000420(NDFIP2),ENSOARG00000000446(LIMS1),ENSOARG00000000454(PTPRF),ENSOARG00000000460(WAPL),ENSOARG00000000469(SP3),ENSOARG00000000488(RPTOR),ENSOARG00000000495(CC…	ENSOARG00000000417(S100A9),ENSOARG00000000432(S100A12),ENSOARG00000000606(MUSTN1),ENSOARG00000000736(PKMYT1),ENSOARG00000000783(REM1),ENSOARG00000001078(-),ENSOARG00000001111(ID1),ENSOARG00000001369(UBE2S),ENSOARG00000001560(ARHGAP22),ENSOARG00000001811(-),ENSOARG00000002756(-),ENSOARG00000003022(ATP5IF1),ENSOARG00000003708(DEPP1),ENSOARG00000003923(TLE7),ENSOARG00000003996(-),ENSOARG00000004078(…
GO:0008150	Biological Process	GO:0023052	signaling	491	25	ENSOARG00000000043(RAB11FIP2),ENSOARG00000000123(-),ENSOARG00000000285(INSR),ENSOARG00000000357(NCOR2),ENSOARG00000000358(PSEN1),ENSOARG00000000446(LIMS1),ENSOARG00000000488(RPTOR),ENSOARG00000000569(TNFAIP3),ENSOARG00000000612(PERP),ENSOARG00000000651(BMPR1A),ENSOARG00000000666(KHDRBS1),ENSOARG00000000778(MET),ENSOARG00000000869(LMTK2),ENSOARG00000000939(MAVS),ENSOARG00000001013(RNF19A),ENSOARG0…	ENSOARG00000000417(S100A9),ENSOARG00000000432(S100A12),ENSOARG00000000783(REM1),ENSOARG00000001078(-),ENSOARG00000001111(ID1),ENSOARG00000001560(ARHGAP22),ENSOARG00000001811(-),ENSOARG00000002756(-),ENSOARG00000004749(ARHGEF9),ENSOARG00000006109(-),ENSOARG00000009308(-),ENSOARG00000010039(AKAP4),ENSOARG00000011012(C5AR2),ENSOARG00000012081(OR4E1),ENSOARG00000013096(IL18R1),ENSOARG00000013108(CHCH…
GO:0008150	Biological Process	GO:0007610	behavior	62	5	ENSOARG00000000358(PSEN1),ENSOARG00000000778(MET),ENSOARG00000001290(PEX13),ENSOARG00000001574(BTG2),ENSOARG00000001899(PUM1),ENSOARG00000002285(GAA),ENSOARG00000002738(MTOR),ENSOARG00000002800(UBE2Q1),ENSOARG00000003435(VWA1),ENSOARG00000004175(FZD4),ENSOARG00000005412(ITGA3),ENSOARG00000006427(PLXNA4),ENSOARG00000006957(PSAP),ENSOARG00000007513(SYNPO),ENSOARG00000007905(NPC1),ENSOARG00000007985…	ENSOARG00000004078(STRA6),ENSOARG00000010869(NPAS1),ENSOARG00000011012(C5AR2),ENSOARG00000016593(ARRDC3),ENSOARG00000018857(SLC1A2)
GO:0008150	Biological Process	GO:0044848	biological phase	1	2	ENSOARG00000002885(CTNNB1)	ENSOARG00000013447(SYCE1),ENSOARG00000015994(GAL)
GO:0008150	Biological Process	GO:0022414	reproductive process	82	9	ENSOARG00000000285(INSR),ENSOARG00000000469(SP3),ENSOARG00000000651(BMPR1A),ENSOARG00000001166(NRIP1),ENSOARG00000001784(PRDX3),ENSOARG00000001873(WDR48),ENSOARG00000001899(PUM1),ENSOARG00000002335(PKD2),ENSOARG00000002608(CITED2),ENSOARG00000002698(YTHDF2),ENSOARG00000002738(MTOR),ENSOARG00000002800(UBE2Q1),ENSOARG00000002885(CTNNB1),ENSOARG00000003613(UBR2),ENSOARG00000003753(PSME4),ENSOARG0000…	ENSOARG00000004078(STRA6),ENSOARG00000010869(NPAS1),ENSOARG00000013447(SYCE1),ENSOARG00000014430(-),ENSOARG00000015308(CNBD2),ENSOARG00000015856(IGF1),ENSOARG00000018424(CCNF),ENSOARG00000018558(MEI1),ENSOARG00000019394(CFAP44)
GO:0008150	Biological Process	GO:0000003	reproduction	82	9	ENSOARG00000000285(INSR),ENSOARG00000000469(SP3),ENSOARG00000000651(BMPR1A),ENSOARG00000001166(NRIP1),ENSOARG00000001784(PRDX3),ENSOARG00000001873(WDR48),ENSOARG00000001899(PUM1),ENSOARG00000002335(PKD2),ENSOARG00000002608(CITED2),ENSOARG00000002698(YTHDF2),ENSOARG00000002738(MTOR),ENSOARG00000002800(UBE2Q1),ENSOARG00000002885(CTNNB1),ENSOARG00000003613(UBR2),ENSOARG00000003753(PSME4),ENSOARG0000…	ENSOARG00000004078(STRA6),ENSOARG00000010869(NPAS1),ENSOARG00000013447(SYCE1),ENSOARG00000014430(-),ENSOARG00000015308(CNBD2),ENSOARG00000015856(IGF1),ENSOARG00000018424(CCNF),ENSOARG00000018558(MEI1),ENSOARG00000019394(CFAP44)
GO:0008150	Biological Process	GO:0098754	detoxification	7	0	ENSOARG00000001784(PRDX3),ENSOARG00000007592(PTGS2),ENSOARG00000007929(GPX3),ENSOARG00000016814(TXNRD1),ENSOARG00000018566(CAT),ENSOARG00000019012(-),ENSOARG00000019966(-)	--
GO:0008150	Biological Process	GO:0098743	cell aggregation	1	0	ENSOARG00000014240(CCN2)	--
GO:0008150	Biological Process	GO:0001906	cell killing	4	2	ENSOARG00000003768(VAMP7),ENSOARG00000011584(F2RL1),ENSOARG00000014303(STX7),ENSOARG00000015718(PTPRC)	ENSOARG00000000432(S100A12),ENSOARG00000014753(ROMO1)
GO:0008150	Biological Process	GO:0099531	presynaptic process involved in synaptic transmission	7	0	ENSOARG00000000358(PSEN1),ENSOARG00000001039(RAP1B),ENSOARG00000002735(CASK),ENSOARG00000007782(GIT1),ENSOARG00000011027(RAB3GAP1),ENSOARG00000016226(ATP2A2),ENSOARG00000020179(PPT1)	--
GO:0003674	Molecular Function	GO:0005488	binding	1195	82	ENSOARG00000000043(RAB11FIP2),ENSOARG00000000069(-),ENSOARG00000000082(MARCH5),ENSOARG00000000123(-),ENSOARG00000000147(ZNF282),ENSOARG00000000155(CPM),ENSOARG00000000161(-),ENSOARG00000000187(API5),ENSOARG00000000197(VPS50),ENSOARG00000000275(-),ENSOARG00000000285(INSR),ENSOARG00000000321(IDE),ENSOARG00000000357(NCOR2),ENSOARG00000000358(PSEN1),ENSOARG00000000420(NDFIP2),ENSOARG00000000446(LIMS1…	ENSOARG00000000019(COX2),ENSOARG00000000035(CYTB),ENSOARG00000000417(S100A9),ENSOARG00000000432(S100A12),ENSOARG00000000674(S100A2),ENSOARG00000000736(PKMYT1),ENSOARG00000000783(REM1),ENSOARG00000000885(-),ENSOARG00000001078(-),ENSOARG00000001111(ID1),ENSOARG00000001369(UBE2S),ENSOARG00000001436(TMEM190),ENSOARG00000001753(NQO2),ENSOARG00000001811(-),ENSOARG00000002091(ARMC3),ENSOARG00000002264(R…
GO:0003674	Molecular Function	GO:0098772	molecular function regulator	119	9	ENSOARG00000000488(RPTOR),ENSOARG00000000840(HPS4),ENSOARG00000000869(LMTK2),ENSOARG00000001463(-),ENSOARG00000001468(MAPK8),ENSOARG00000001632(STIM1),ENSOARG00000001784(PRDX3),ENSOARG00000002034(FLCN),ENSOARG00000002035(WARS),ENSOARG00000002302(RAPGEF2),ENSOARG00000002524(PPP1R15B),ENSOARG00000002720(VAV2),ENSOARG00000002971(PHACTR4),ENSOARG00000003283(PPP1R8),ENSOARG00000003400(RALGAPA2),ENSOAR…	ENSOARG00000001560(ARHGAP22),ENSOARG00000001811(-),ENSOARG00000002756(-),ENSOARG00000003022(ATP5IF1),ENSOARG00000004749(ARHGEF9),ENSOARG00000009808(APOA2),ENSOARG00000012323(ACAP1),ENSOARG00000012365(INKA1),MSTRG.8304(--)
GO:0003674	Molecular Function	GO:0003824	catalytic activity	532	47	ENSOARG00000000082(MARCH5),ENSOARG00000000103(-),ENSOARG00000000117(-),ENSOARG00000000155(CPM),ENSOARG00000000285(INSR),ENSOARG00000000321(IDE),ENSOARG00000000358(PSEN1),ENSOARG00000000454(PTPRF),ENSOARG00000000495(CCNK),ENSOARG00000000536(AGPAT1),ENSOARG00000000569(TNFAIP3),ENSOARG00000000619(RAB8A),ENSOARG00000000637(EHMT1),ENSOARG00000000651(BMPR1A),ENSOARG00000000778(MET),ENSOARG00000000837(H…	ENSOARG00000000010(ND2),ENSOARG00000000019(COX2),ENSOARG00000000022(ATP6),ENSOARG00000000023(COX3),ENSOARG00000000025(ND3),ENSOARG00000000033(ND6),ENSOARG00000000035(CYTB),ENSOARG00000000736(PKMYT1),ENSOARG00000000783(REM1),ENSOARG00000001078(-),ENSOARG00000001369(UBE2S),ENSOARG00000001753(NQO2),ENSOARG00000002264(RAD54L),ENSOARG00000003996(-),ENSOARG00000004229(PKLR),ENSOARG00000005352(-),ENSOAR…
GO:0003674	Molecular Function	GO:0000988	transcription factor activity, protein binding	48	0	ENSOARG00000000357(NCOR2),ENSOARG00000001020(BCOR),ENSOARG00000001166(NRIP1),ENSOARG00000002200(NUP98),ENSOARG00000002365(USP22),ENSOARG00000002417(-),ENSOARG00000002484(CREBBP),ENSOARG00000002608(CITED2),ENSOARG00000002885(CTNNB1),ENSOARG00000003111(MAML1),ENSOARG00000003126(PBXIP1),ENSOARG00000003640(BRD4),ENSOARG00000003774(KMT5A),ENSOARG00000004350(MTDH),ENSOARG00000004403(ARID5B),ENSOARG0000…	--
GO:0003674	Molecular Function	GO:0005215	transporter activity	111	16	ENSOARG00000000358(PSEN1),ENSOARG00000000582(SLC25A53),ENSOARG00000000739(-),ENSOARG00000000935(-),ENSOARG00000000960(XPO6),ENSOARG00000001399(SLC24A3),ENSOARG00000001512(SCN5A),ENSOARG00000001513(SLC26A11),ENSOARG00000001630(SLC39A1),ENSOARG00000002331(SLC35C1),ENSOARG00000002335(PKD2),ENSOARG00000002397(ABCB8),ENSOARG00000002448(ATP8B2),ENSOARG00000003101(COG2),ENSOARG00000003192(-),ENSOARG0000…	ENSOARG00000000019(COX2),ENSOARG00000000022(ATP6),ENSOARG00000000023(COX3),ENSOARG00000000035(CYTB),ENSOARG00000001207(SLC22A14),ENSOARG00000001737(-),ENSOARG00000001926(SLC17A3),ENSOARG00000004078(STRA6),ENSOARG00000009808(APOA2),ENSOARG00000010849(CATSPER2),ENSOARG00000012478(-),ENSOARG00000013236(UQCRQ),ENSOARG00000018857(SLC1A2),ENSOARG00000019174(-),ENSOARG00000019331(SLC22A17),MSTRG.26076(A…
GO:0003674	Molecular Function	GO:0031386	protein tag	0	1	--	ENSOARG00000007233(ISG15)
GO:0003674	Molecular Function	GO:0009055	electron carrier activity	6	5	ENSOARG00000007136(DLD),ENSOARG00000010008(SDHC),ENSOARG00000016052(AOX1),ENSOARG00000016428(COX10),ENSOARG00000016814(TXNRD1),ENSOARG00000018943(CYBB)	ENSOARG00000000019(COX2),ENSOARG00000000023(COX3),ENSOARG00000000035(CYTB),ENSOARG00000001753(NQO2),MSTRG.13330(MT-CO1)
GO:0003674	Molecular Function	GO:0045182	translation regulator activity	5	0	ENSOARG00000006042(SAMD4B),ENSOARG00000008716(-),ENSOARG00000009673(FMR1),ENSOARG00000009893(LARP1),ENSOARG00000015905(EIF4E)	--
GO:0003674	Molecular Function	GO:0016209	antioxidant activity	7	0	ENSOARG00000001784(PRDX3),ENSOARG00000007592(PTGS2),ENSOARG00000007929(GPX3),ENSOARG00000016814(TXNRD1),ENSOARG00000018566(CAT),ENSOARG00000019012(-),ENSOARG00000019966(-)	--
GO:0003674	Molecular Function	GO:0016530	metallochaperone activity	1	0	ENSOARG00000008456(TF)	--
GO:0003674	Molecular Function	GO:0001071	nucleic acid binding transcription factor activity	72	2	ENSOARG00000000469(SP3),ENSOARG00000000651(BMPR1A),ENSOARG00000002608(CITED2),ENSOARG00000002885(CTNNB1),ENSOARG00000003053(CTCF),ENSOARG00000003333(ZBTB7B),ENSOARG00000003391(PCGF6),ENSOARG00000003426(-),ENSOARG00000003661(TOX2),ENSOARG00000003928(HNF4A),ENSOARG00000004403(ARID5B),ENSOARG00000004604(TSC22D2),ENSOARG00000004662(SMAD4),ENSOARG00000004929(-),ENSOARG00000005019(-),ENSOARG00000005180…	ENSOARG00000001111(ID1),ENSOARG00000013331(PAXBP1)
GO:0003674	Molecular Function	GO:0005198	structural molecule activity	32	13	ENSOARG00000001379(CAV2),ENSOARG00000002200(NUP98),ENSOARG00000002482(SASH1),ENSOARG00000003144(SPAG9),ENSOARG00000003474(SPTBN1),ENSOARG00000006200(NES),ENSOARG00000008576(VCL),ENSOARG00000008680(COPA),ENSOARG00000008977(NUP188),ENSOARG00000009304(ADD3),ENSOARG00000010415(WWC3),ENSOARG00000010602(CLDN6),ENSOARG00000010666(AKAP13),ENSOARG00000011514(NUP153),ENSOARG00000011780(ACTR3),ENSOARG000000…	ENSOARG00000001548(CRYBB1),ENSOARG00000003689(-),ENSOARG00000003964(-),ENSOARG00000004351(-),ENSOARG00000004370(-),ENSOARG00000004995(-),ENSOARG00000007383(-),ENSOARG00000008321(EVPL),ENSOARG00000012038(-),ENSOARG00000012079(-),ENSOARG00000013126(RPS21),ENSOARG00000016318(-),ENSOARG00000019994(-)
GO:0003674	Molecular Function	GO:0060089	molecular transducer activity	85	8	ENSOARG00000000285(INSR),ENSOARG00000000651(BMPR1A),ENSOARG00000000778(MET),ENSOARG00000001397(ADGRG6),ENSOARG00000002335(PKD2),ENSOARG00000002562(IL6R),ENSOARG00000002627(ATRN),ENSOARG00000003928(HNF4A),ENSOARG00000004175(FZD4),ENSOARG00000004241(SMO),ENSOARG00000004632(IGF2R),ENSOARG00000005944(ADGRE5),ENSOARG00000006261(LRP8),ENSOARG00000006349(AP2B1),ENSOARG00000006382(UNC5B),ENSOARG000000064…	ENSOARG00000004078(STRA6),ENSOARG00000011012(C5AR2),ENSOARG00000012081(OR4E1),ENSOARG00000013096(IL18R1),ENSOARG00000015994(GAL),ENSOARG00000019331(SLC22A17),MSTRG.16466(--),MSTRG.20680(--)
GO:0003674	Molecular Function	GO:0004871	signal transducer activity	81	6	ENSOARG00000000285(INSR),ENSOARG00000000651(BMPR1A),ENSOARG00000000778(MET),ENSOARG00000001397(ADGRG6),ENSOARG00000001468(MAPK8),ENSOARG00000002335(PKD2),ENSOARG00000002562(IL6R),ENSOARG00000002612(MAP2K3),ENSOARG00000002627(ATRN),ENSOARG00000003928(HNF4A),ENSOARG00000004175(FZD4),ENSOARG00000004241(SMO),ENSOARG00000004632(IGF2R),ENSOARG00000004662(SMAD4),ENSOARG00000005944(ADGRE5),ENSOARG0000000…	ENSOARG00000004078(STRA6),ENSOARG00000011012(C5AR2),ENSOARG00000012081(OR4E1),ENSOARG00000013096(IL18R1),ENSOARG00000015994(GAL),ENSOARG00000019331(SLC22A17)
GO:0005575	Cellular Component	GO:0043226	organelle	988	79	ENSOARG00000000043(RAB11FIP2),ENSOARG00000000082(MARCH5),ENSOARG00000000089(GTF3C1),ENSOARG00000000161(-),ENSOARG00000000187(API5),ENSOARG00000000197(VPS50),ENSOARG00000000285(INSR),ENSOARG00000000321(IDE),ENSOARG00000000357(NCOR2),ENSOARG00000000358(PSEN1),ENSOARG00000000420(NDFIP2),ENSOARG00000000433(NAP1L5),ENSOARG00000000460(WAPL),ENSOARG00000000469(SP3),ENSOARG00000000479(TTC17),ENSOARG00000…	ENSOARG00000000010(ND2),ENSOARG00000000019(COX2),ENSOARG00000000022(ATP6),ENSOARG00000000023(COX3),ENSOARG00000000025(ND3),ENSOARG00000000033(ND6),ENSOARG00000000035(CYTB),ENSOARG00000000417(S100A9),ENSOARG00000000432(S100A12),ENSOARG00000000606(MUSTN1),ENSOARG00000000736(PKMYT1),ENSOARG00000000885(-),ENSOARG00000001111(ID1),ENSOARG00000001369(UBE2S),ENSOARG00000001436(TMEM190),ENSOARG00000001753…
GO:0005575	Cellular Component	GO:0044464	cell part	1241	104	ENSOARG00000000043(RAB11FIP2),ENSOARG00000000082(MARCH5),ENSOARG00000000089(GTF3C1),ENSOARG00000000090(AP1M1),ENSOARG00000000147(ZNF282),ENSOARG00000000161(-),ENSOARG00000000187(API5),ENSOARG00000000197(VPS50),ENSOARG00000000285(INSR),ENSOARG00000000321(IDE),ENSOARG00000000357(NCOR2),ENSOARG00000000358(PSEN1),ENSOARG00000000399(TBC1D2B),ENSOARG00000000420(NDFIP2),ENSOARG00000000433(NAP1L5),ENSOAR…	ENSOARG00000000010(ND2),ENSOARG00000000019(COX2),ENSOARG00000000022(ATP6),ENSOARG00000000023(COX3),ENSOARG00000000025(ND3),ENSOARG00000000033(ND6),ENSOARG00000000035(CYTB),ENSOARG00000000417(S100A9),ENSOARG00000000432(S100A12),ENSOARG00000000474(GJA4),ENSOARG00000000606(MUSTN1),ENSOARG00000000736(PKMYT1),ENSOARG00000000885(-),ENSOARG00000001111(ID1),ENSOARG00000001369(UBE2S),ENSOARG00000001436(TM…
GO:0005575	Cellular Component	GO:0005623	cell	1250	106	ENSOARG00000000043(RAB11FIP2),ENSOARG00000000082(MARCH5),ENSOARG00000000089(GTF3C1),ENSOARG00000000090(AP1M1),ENSOARG00000000147(ZNF282),ENSOARG00000000161(-),ENSOARG00000000187(API5),ENSOARG00000000197(VPS50),ENSOARG00000000285(INSR),ENSOARG00000000321(IDE),ENSOARG00000000357(NCOR2),ENSOARG00000000358(PSEN1),ENSOARG00000000399(TBC1D2B),ENSOARG00000000420(NDFIP2),ENSOARG00000000433(NAP1L5),ENSOAR…	ENSOARG00000000010(ND2),ENSOARG00000000019(COX2),ENSOARG00000000022(ATP6),ENSOARG00000000023(COX3),ENSOARG00000000025(ND3),ENSOARG00000000033(ND6),ENSOARG00000000035(CYTB),ENSOARG00000000417(S100A9),ENSOARG00000000432(S100A12),ENSOARG00000000474(GJA4),ENSOARG00000000606(MUSTN1),ENSOARG00000000736(PKMYT1),ENSOARG00000000885(-),ENSOARG00000001111(ID1),ENSOARG00000001369(UBE2S),ENSOARG00000001436(TM…
GO:0005575	Cellular Component	GO:0030054	cell junction	96	4	ENSOARG00000000358(PSEN1),ENSOARG00000000446(LIMS1),ENSOARG00000001039(RAP1B),ENSOARG00000001308(PCDH1),ENSOARG00000001379(CAV2),ENSOARG00000001700(PLCG1),ENSOARG00000001750(PEAK1),ENSOARG00000002034(FLCN),ENSOARG00000002229(PTPRU),ENSOARG00000002302(RAPGEF2),ENSOARG00000002335(PKD2),ENSOARG00000002735(CASK),ENSOARG00000002885(CTNNB1),ENSOARG00000003416(WASF2),ENSOARG00000003418(PTK2),ENSOARG0000…	ENSOARG00000000417(S100A9),ENSOARG00000000474(GJA4),ENSOARG00000005652(CDCA3),ENSOARG00000018424(CCNF)
GO:0005575	Cellular Component	GO:0044422	organelle part	627	49	ENSOARG00000000043(RAB11FIP2),ENSOARG00000000082(MARCH5),ENSOARG00000000089(GTF3C1),ENSOARG00000000161(-),ENSOARG00000000187(API5),ENSOARG00000000197(VPS50),ENSOARG00000000285(INSR),ENSOARG00000000357(NCOR2),ENSOARG00000000358(PSEN1),ENSOARG00000000460(WAPL),ENSOARG00000000488(RPTOR),ENSOARG00000000491(SRRM2),ENSOARG00000000495(CCNK),ENSOARG00000000619(RAB8A),ENSOARG00000000636(DIAPH1),ENSOARG000…	ENSOARG00000000010(ND2),ENSOARG00000000019(COX2),ENSOARG00000000022(ATP6),ENSOARG00000000023(COX3),ENSOARG00000000025(ND3),ENSOARG00000000033(ND6),ENSOARG00000000035(CYTB),ENSOARG00000000417(S100A9),ENSOARG00000000736(PKMYT1),ENSOARG00000000885(-),ENSOARG00000001111(ID1),ENSOARG00000001369(UBE2S),ENSOARG00000001436(TMEM190),ENSOARG00000001753(NQO2),ENSOARG00000001811(-),ENSOARG00000001926(SLC17A3…
GO:0005575	Cellular Component	GO:0016020	membrane	774	57	ENSOARG00000000082(MARCH5),ENSOARG00000000090(AP1M1),ENSOARG00000000123(-),ENSOARG00000000285(INSR),ENSOARG00000000321(IDE),ENSOARG00000000358(PSEN1),ENSOARG00000000420(NDFIP2),ENSOARG00000000446(LIMS1),ENSOARG00000000454(PTPRF),ENSOARG00000000479(TTC17),ENSOARG00000000510(IFNGR1),ENSOARG00000000519(PCDHGC3),ENSOARG00000000536(AGPAT1),ENSOARG00000000582(SLC25A53),ENSOARG00000000612(PERP),ENSOARG0…	ENSOARG00000000010(ND2),ENSOARG00000000019(COX2),ENSOARG00000000022(ATP6),ENSOARG00000000023(COX3),ENSOARG00000000025(ND3),ENSOARG00000000033(ND6),ENSOARG00000000035(CYTB),ENSOARG00000000474(GJA4),ENSOARG00000000783(REM1),ENSOARG00000001207(SLC22A14),ENSOARG00000001436(TMEM190),ENSOARG00000001737(-),ENSOARG00000001926(SLC17A3),ENSOARG00000003996(-),ENSOARG00000004078(STRA6),ENSOARG00000004439(C1o…
GO:0005575	Cellular Component	GO:0031974	membrane-enclosed lumen	349	18	ENSOARG00000000043(RAB11FIP2),ENSOARG00000000089(GTF3C1),ENSOARG00000000187(API5),ENSOARG00000000285(INSR),ENSOARG00000000357(NCOR2),ENSOARG00000000460(WAPL),ENSOARG00000000488(RPTOR),ENSOARG00000000491(SRRM2),ENSOARG00000000495(CCNK),ENSOARG00000000637(EHMT1),ENSOARG00000000666(KHDRBS1),ENSOARG00000000916(TNFAIP8L3),ENSOARG00000000940(ALDH6A1),ENSOARG00000000942(-),ENSOARG00000000960(XPO6),ENSOA…	ENSOARG00000000417(S100A9),ENSOARG00000000736(PKMYT1),ENSOARG00000001111(ID1),ENSOARG00000001753(NQO2),ENSOARG00000002264(RAD54L),ENSOARG00000003186(CENPT),ENSOARG00000004656(-),ENSOARG00000005411(NDUFB7),ENSOARG00000005556(-),ENSOARG00000005750(CENPH),ENSOARG00000006064(MED29),ENSOARG00000011122(CLEC3B),ENSOARG00000013447(SYCE1),ENSOARG00000013512(CDT1),ENSOARG00000015114(CYP24A1),ENSOARG0000001…
GO:0005575	Cellular Component	GO:0032991	macromolecular complex	417	52	ENSOARG00000000089(GTF3C1),ENSOARG00000000090(AP1M1),ENSOARG00000000161(-),ENSOARG00000000187(API5),ENSOARG00000000197(VPS50),ENSOARG00000000285(INSR),ENSOARG00000000357(NCOR2),ENSOARG00000000358(PSEN1),ENSOARG00000000460(WAPL),ENSOARG00000000469(SP3),ENSOARG00000000470(DCAF16),ENSOARG00000000488(RPTOR),ENSOARG00000000491(SRRM2),ENSOARG00000000495(CCNK),ENSOARG00000000840(HPS4),ENSOARG00000000875…	ENSOARG00000000010(ND2),ENSOARG00000000019(COX2),ENSOARG00000000022(ATP6),ENSOARG00000000023(COX3),ENSOARG00000000025(ND3),ENSOARG00000000035(CYTB),ENSOARG00000000474(GJA4),ENSOARG00000000885(-),ENSOARG00000001369(UBE2S),ENSOARG00000001811(-),ENSOARG00000002264(RAD54L),ENSOARG00000002387(TRAPPC5),ENSOARG00000003186(CENPT),ENSOARG00000003689(-),ENSOARG00000003964(-),ENSOARG00000004078(STRA6),ENSOA…
GO:0005575	Cellular Component	GO:0044420	extracellular matrix component	12	0	ENSOARG00000000744(LAMC2),ENSOARG00000002735(CASK),ENSOARG00000003435(VWA1),ENSOARG00000003598(NID1),ENSOARG00000005941(TNC),ENSOARG00000009750(NPNT),ENSOARG00000011234(MFAP1),ENSOARG00000011846(NTN4),ENSOARG00000013645(DAG1),ENSOARG00000014898(ADAMTS1),ENSOARG00000019329(FN1),ENSOARG00000020503(COL4A4)	--
GO:0005575	Cellular Component	GO:0031012	extracellular matrix	22	0	ENSOARG00000000744(LAMC2),ENSOARG00000000948(HSD17B12),ENSOARG00000001159(MMP15),ENSOARG00000002735(CASK),ENSOARG00000003435(VWA1),ENSOARG00000003598(NID1),ENSOARG00000004790(MMP13),ENSOARG00000004930(MMP12),ENSOARG00000005941(TNC),ENSOARG00000008233(ECM2),ENSOARG00000009750(NPNT),ENSOARG00000010519(OLFML2B),ENSOARG00000011234(MFAP1),ENSOARG00000011846(NTN4),ENSOARG00000013645(DAG1),ENSOARG000000…	--
GO:0005575	Cellular Component	GO:0045202	synapse	54	2	ENSOARG00000000358(PSEN1),ENSOARG00000001013(RNF19A),ENSOARG00000001311(NDEL1),ENSOARG00000002539(MYRIP),ENSOARG00000002647(MAP4),ENSOARG00000002735(CASK),ENSOARG00000002885(CTNNB1),ENSOARG00000002894(RTN4),ENSOARG00000003168(ELAVL1),ENSOARG00000003416(WASF2),ENSOARG00000003474(SPTBN1),ENSOARG00000004175(FZD4),ENSOARG00000004271(CLSTN3),ENSOARG00000004811(QKI),ENSOARG00000004902(ZC4H2),ENSOARG000…	ENSOARG00000004749(ARHGEF9),ENSOARG00000013126(RPS21)
GO:0005575	Cellular Component	GO:0044425	membrane part	594	46	ENSOARG00000000082(MARCH5),ENSOARG00000000090(AP1M1),ENSOARG00000000123(-),ENSOARG00000000285(INSR),ENSOARG00000000321(IDE),ENSOARG00000000358(PSEN1),ENSOARG00000000420(NDFIP2),ENSOARG00000000454(PTPRF),ENSOARG00000000510(IFNGR1),ENSOARG00000000519(PCDHGC3),ENSOARG00000000536(AGPAT1),ENSOARG00000000582(SLC25A53),ENSOARG00000000612(PERP),ENSOARG00000000651(BMPR1A),ENSOARG00000000739(-),ENSOARG0000…	ENSOARG00000000010(ND2),ENSOARG00000000019(COX2),ENSOARG00000000022(ATP6),ENSOARG00000000023(COX3),ENSOARG00000000025(ND3),ENSOARG00000000033(ND6),ENSOARG00000000035(CYTB),ENSOARG00000000474(GJA4),ENSOARG00000001207(SLC22A14),ENSOARG00000001436(TMEM190),ENSOARG00000001737(-),ENSOARG00000001926(SLC17A3),ENSOARG00000003996(-),ENSOARG00000004078(STRA6),ENSOARG00000004439(C1orf185),ENSOARG00000005352…
GO:0005575	Cellular Component	GO:0044456	synapse part	41	1	ENSOARG00000000358(PSEN1),ENSOARG00000001013(RNF19A),ENSOARG00000001311(NDEL1),ENSOARG00000002647(MAP4),ENSOARG00000002885(CTNNB1),ENSOARG00000002894(RTN4),ENSOARG00000003168(ELAVL1),ENSOARG00000003474(SPTBN1),ENSOARG00000004271(CLSTN3),ENSOARG00000004902(ZC4H2),ENSOARG00000005004(FCHO2),ENSOARG00000005093(ARHGEF2),ENSOARG00000005412(ITGA3),ENSOARG00000005753(-),ENSOARG00000006349(AP2B1),ENSOARG0…	ENSOARG00000004749(ARHGEF9)
GO:0005575	Cellular Component	GO:0044215	other organism	2	0	ENSOARG00000009673(FMR1),ENSOARG00000011093(PI4K2A)	--
GO:0005575	Cellular Component	GO:0044217	other organism part	2	0	ENSOARG00000009673(FMR1),ENSOARG00000011093(PI4K2A)	--
GO:0005575	Cellular Component	GO:0009295	nucleoid	4	0	ENSOARG00000004440(LRRC59),ENSOARG00000011898(GRSF1),ENSOARG00000013705(VDAC1),ENSOARG00000018110(DBT)	--
GO:0005575	Cellular Component	GO:0099512	supramolecular fiber	33	2	ENSOARG00000002335(PKD2),ENSOARG00000002647(MAP4),ENSOARG00000003926(CARMIL1),ENSOARG00000005093(ARHGEF2),ENSOARG00000005883(SIRT2),ENSOARG00000006200(NES),ENSOARG00000006205(SEPT9),ENSOARG00000006919(KIF2A),ENSOARG00000007259(TUBGCP3),ENSOARG00000008412(SRPRB),ENSOARG00000009463(SHROOM4),ENSOARG00000010288(MAP1A),ENSOARG00000010666(AKAP13),ENSOARG00000011271(TMOD1),ENSOARG00000011354(KLHL21),ENS…	ENSOARG00000004351(-),ENSOARG00000016116(KIF14)
GO:0005575	Cellular Component	GO:0044421	extracellular region part	66	10	ENSOARG00000000321(IDE),ENSOARG00000000744(LAMC2),ENSOARG00000001037(TWSG1),ENSOARG00000001148(HFE),ENSOARG00000002627(ATRN),ENSOARG00000002735(CASK),ENSOARG00000003435(VWA1),ENSOARG00000003586(IGF2),ENSOARG00000003598(NID1),ENSOARG00000003763(AGO2),ENSOARG00000004007(LIPG),ENSOARG00000004379(C1RL),ENSOARG00000004500(NAMPT),ENSOARG00000004930(MMP12),ENSOARG00000005732(DIPK2A),ENSOARG00000005941(T…	ENSOARG00000000417(S100A9),ENSOARG00000005839(LGALS4),ENSOARG00000009464(-),ENSOARG00000009808(APOA2),ENSOARG00000009865(-),ENSOARG00000011122(CLEC3B),ENSOARG00000013956(LGALS1),ENSOARG00000015856(IGF1),ENSOARG00000015994(GAL),ENSOARG00000018312(HPX)
GO:0005575	Cellular Component	GO:0005576	extracellular region	82	15	ENSOARG00000000123(-),ENSOARG00000000321(IDE),ENSOARG00000000744(LAMC2),ENSOARG00000001037(TWSG1),ENSOARG00000001148(HFE),ENSOARG00000002562(IL6R),ENSOARG00000002627(ATRN),ENSOARG00000002735(CASK),ENSOARG00000003259(PON2),ENSOARG00000003435(VWA1),ENSOARG00000003586(IGF2),ENSOARG00000003598(NID1),ENSOARG00000003763(AGO2),ENSOARG00000004007(LIPG),ENSOARG00000004379(C1RL),ENSOARG00000004500(NAMPT),E…	ENSOARG00000000417(S100A9),ENSOARG00000004756(HAMP),ENSOARG00000005839(LGALS4),ENSOARG00000006109(-),ENSOARG00000007233(ISG15),ENSOARG00000009308(-),ENSOARG00000009464(-),ENSOARG00000009808(APOA2),ENSOARG00000009865(-),ENSOARG00000011122(CLEC3B),ENSOARG00000013956(LGALS1),ENSOARG00000015403(NTS),ENSOARG00000015856(IGF1),ENSOARG00000015994(GAL),ENSOARG00000018312(HPX)
