# Supplementary material for: Vitamin E Can Ameliorate Oxidative Damage of Ovine Hepatocytes In Vitro by Regulating Genes Expression Associated with Apoptosis and Pyroptosis, but Not Ferroptosis
Source: Molecules. 2021 Jul 27;26(15):4520. doi: 10.3390/molecules26154520 (PMC8348559; doi:10.3390/molecules26154520)
Supplement: Supplementary file 1 [file molecules-26-04520-s001.zip › Supplementary File 3.xls]

KEGG_A_class	KEGG_B_class	Pathway	C1-vs-C2 (360)	All (6644)	Pvalue	Qvalue	Pathway ID	Genes	K_IDs
Cellular Processes	Cell growth and death	Cell cycle	24	118	1.224423e-08	3.416140e-06	ko04110	ENSOARG00000002484(CREBBP);ENSOARG00000004318(CDK1);ENSOARG00000004421(CDKN2C);ENSOARG00000005282(ORC1);ENSOARG00000005759(-);ENSOARG00000007151(TTK);ENSOARG00000007419(ABL1);ENSOARG00000009908(-);ENSOARG00000011356(GADD45A);ENSOARG00000012797(MCM4);ENSOARG00000013532(-);ENSOARG00000013636(CDKN1A);ENSOARG00000014063(CDC6);ENSOARG00000014143(MCM3);ENSOARG00000014176(CCNA2);ENSOARG00000014305(BUB1)…	K04498+K02087+K06622+K02603+K05868+K08866+K06619+K21771+K04402+K02212+K06635+K06625+K02213+K02541+K06627+K02178+K02537+K06631+K04498+K02209+K06637+K03363+K21770+K05868
Human Diseases	Cancers	MicroRNAs in cancer	22	129	1.269044e-06	1.770316e-04	ko05206	ENSOARG00000000873(PRKCG);ENSOARG00000001700(PLCG1);ENSOARG00000002484(CREBBP);ENSOARG00000002738(MTOR);ENSOARG00000003199(SHC1);ENSOARG00000004234(SLC45A3);ENSOARG00000007419(ABL1);ENSOARG00000007592(PTGS2);ENSOARG00000008334(VEGFA);ENSOARG00000010448(ERBB3);ENSOARG00000012718(NFKB1);ENSOARG00000013636(CDKN1A);ENSOARG00000013971(ZEB1);ENSOARG00000015114(CYP24A1);ENSOARG00000016130(APC);ENSOARG00…	K19663+K01116+K04498+K07203+K06279+K15379+K06619+K11987+K05448+K05084+K02580+K06625+K09299+K07436+K02085+K06484+K04671+K04498+K17398+K16857+K20994+K03099
Metabolism	Amino acid metabolism	Lysine degradation	12	67	0.0002133229	1.856755e-02	ko00310	ENSOARG00000002293(KMT2E);ENSOARG00000003774(KMT5A);ENSOARG00000003834(NSD1);ENSOARG00000004448(ASH1L);ENSOARG00000005193(KMT2C);ENSOARG00000008207(-);ENSOARG00000009830(-);ENSOARG00000014177(DOT1L);ENSOARG00000015084(KMT5B);ENSOARG00000018975(KMT2D);ENSOARG00000020569(EHHADH);MSTRG.6249(SETMAR)	K09189+K11428+K15588+K06101+K09188+K11422+K09186+K11427+K11429+K09187+K07514+K11433
Cellular Processes	Cell growth and death	Oocyte meiosis	15	103	0.0003929498	1.856755e-02	ko04114	ENSOARG00000004318(CDK1);ENSOARG00000005177(SLK);ENSOARG00000005759(-);ENSOARG00000008716(-);ENSOARG00000013532(-);ENSOARG00000013595(-);ENSOARG00000014305(BUB1);ENSOARG00000014624(PPP2R1B);ENSOARG00000015665(MAD2L1);ENSOARG00000017216(STAG3);ENSOARG00000017343(PLK1);ENSOARG00000019194(REC8);ENSOARG00000020542(CDC20);ENSOARG00000020836(CCNB2);ENSOARG00000021023(-)	K02087+K08836+K05868+K02602+K06635+K02602+K02178+K03456+K02537+K13055+K06631+K13054+K03363+K21770+K05868
Cellular Processes	Cell growth and death	p53 signaling pathway	11	62	0.0004243842	1.856755e-02	ko04115	ENSOARG00000004318(CDK1);ENSOARG00000005759(-);ENSOARG00000009085(SESN3);ENSOARG00000011356(GADD45A);ENSOARG00000012368(STEAP3);ENSOARG00000013636(CDKN1A);ENSOARG00000015333(RRM2);ENSOARG00000016922(CASP8);ENSOARG00000020058(THBS1);ENSOARG00000020836(CCNB2);ENSOARG00000021023(-)	K02087+K05868+K10141+K04402+K10142+K06625+K10808+K04398+K16857+K21770+K05868
Genetic Information Processing	Replication and repair	DNA replication	8	35	0.0004448213	1.856755e-02	ko03030	ENSOARG00000008185(-);ENSOARG00000010697(RFC3);ENSOARG00000011737(RFC2);ENSOARG00000012797(MCM4);ENSOARG00000014143(MCM3);ENSOARG00000017675(RNASEH2C);ENSOARG00000018527(MCM5);ENSOARG00000020607(POLE2)	K02684+K10756+K10755+K02212+K02541+K10745+K02209+K02325
Organismal Systems	Endocrine system	Progesterone-mediated oocyte maturation	13	83	0.0004658525	1.856755e-02	ko04914	ENSOARG00000004318(CDK1);ENSOARG00000005591(KIF22);ENSOARG00000005759(-);ENSOARG00000007664(PIK3CD);ENSOARG00000008716(-);ENSOARG00000009908(-);ENSOARG00000013595(-);ENSOARG00000014176(CCNA2);ENSOARG00000014305(BUB1);ENSOARG00000015665(MAD2L1);ENSOARG00000017343(PLK1);ENSOARG00000020836(CCNB2);ENSOARG00000021023(-)	K02087+K10403+K05868+K00922+K02602+K21771+K02602+K06627+K02178+K02537+K06631+K21770+K05868
Human Diseases	Infectious diseases	HTLV-I infection	24	215	0.0005494953	1.916365e-02	ko05166	ENSOARG00000000072(FOSL1);ENSOARG00000000347(TRRAP);ENSOARG00000000483(NFKB2);ENSOARG00000001610(-);ENSOARG00000002484(CREBBP);ENSOARG00000003547(MYBL2);ENSOARG00000004058(IKBKG);ENSOARG00000004421(CDKN2C);ENSOARG00000007137(RRAS2);ENSOARG00000007335(DYA);ENSOARG00000007664(PIK3CD);ENSOARG00000009999(JUN);ENSOARG00000012718(NFKB1);ENSOARG00000013532(-);ENSOARG00000013636(CDKN1A);ENSOARG0000001566…	K04502+K08874+K04469+K16333+K04498+K21769+K07210+K06622+K07830+K06752+K00922+K04448+K02580+K06635+K06625+K02537+K02085+K09203+K04498+K06637+K07299+K03363+K02325+K21770
Human Diseases	Cancers	Renal cell carcinoma	11	67	0.0008413116	2.608066e-02	ko05211	ENSOARG00000002034(FLCN);ENSOARG00000002484(CREBBP);ENSOARG00000006521(RAPGEF1);ENSOARG00000007664(PIK3CD);ENSOARG00000008334(VEGFA);ENSOARG00000009999(JUN);ENSOARG00000011157(TFE3);ENSOARG00000013636(CDKN1A);ENSOARG00000017943(EP300);ENSOARG00000020471(SLC2A1);ENSOARG00000020627(SOS2)	K09594+K04498+K06277+K00922+K05448+K04448+K09105+K06625+K04498+K07299+K03099
Human Diseases	Infectious diseases	Human papillomavirus infection	29	291	0.0009875711	2.755323e-02	ko05165	ENSOARG00000002484(CREBBP);ENSOARG00000002590(SPP1);ENSOARG00000002738(MTOR);ENSOARG00000003418(PTK2);ENSOARG00000004058(IKBKG);ENSOARG00000007592(PTGS2);ENSOARG00000007664(PIK3CD);ENSOARG00000008212(ITGA2);ENSOARG00000008334(VEGFA);ENSOARG00000008370(GPATCH8);ENSOARG00000010523(JAG1);ENSOARG00000012718(NFKB1);ENSOARG00000013636(CDKN1A);ENSOARG00000013781(PARD6B);ENSOARG00000014176(CCNA2);ENSOARG…	K04498+K06250+K07203+K05725+K07210+K11987+K00922+K06481+K05448+K06476+K06052+K02580+K06625+K06093+K06627+K03456+K09444+K11219+K02085+K06484+K04398+K04498+K11408+K16857+K06054+K20994+K06237+K03099+K06586
Environmental Information Processing	Signal transduction	ErbB signaling pathway	12	80	0.001134757	2.878156e-02	ko04012	ENSOARG00000000873(PRKCG);ENSOARG00000001700(PLCG1);ENSOARG00000002738(MTOR);ENSOARG00000003199(SHC1);ENSOARG00000003418(PTK2);ENSOARG00000007419(ABL1);ENSOARG00000007664(PIK3CD);ENSOARG00000009999(JUN);ENSOARG00000010448(ERBB3);ENSOARG00000013636(CDKN1A);ENSOARG00000018775(CBLB);ENSOARG00000020627(SOS2)	K19663+K01116+K07203+K06279+K05725+K06619+K00922+K04448+K05084+K06625+K22517+K03099
Human Diseases	Cancers	Small cell lung cancer	12	85	0.001942	4.335052e-02	ko05222	ENSOARG00000003418(PTK2);ENSOARG00000004058(IKBKG);ENSOARG00000006356(BIRC3);ENSOARG00000006491(BIRC2);ENSOARG00000007592(PTGS2);ENSOARG00000007664(PIK3CD);ENSOARG00000008212(ITGA2);ENSOARG00000008370(GPATCH8);ENSOARG00000011356(GADD45A);ENSOARG00000012718(NFKB1);ENSOARG00000013636(CDKN1A);ENSOARG00000020525(COL4A3)	K05725+K07210+K16060+K16060+K11987+K00922+K06481+K06476+K04402+K02580+K06625+K06237
Human Diseases	Infectious diseases	Influenza A	17	145	0.002050785	4.335052e-02	ko05164	ENSOARG00000002200(NUP98);ENSOARG00000002484(CREBBP);ENSOARG00000002952(ADAR);ENSOARG00000007335(DYA);ENSOARG00000007591(NLRP3);ENSOARG00000007664(PIK3CD);ENSOARG00000009999(JUN);ENSOARG00000011288(TLR7);ENSOARG00000012718(NFKB1);ENSOARG00000013869(MAP2K6);ENSOARG00000016012(TYK2);ENSOARG00000017354(NXF1);ENSOARG00000017943(EP300);ENSOARG00000020774(EIF2AK3);ENSOARG00000020866(IL1B);ENSOARG000000…	K14297+K04498+K12968+K06752+K12800+K00922+K04448+K05404+K02580+K04433+K11219+K14284+K04498+K08860+K04519+K04383+K15047
Environmental Information Processing	Signal transduction	TGF-beta signaling pathway	11	75	0.002175295	4.335052e-02	ko04350	ENSOARG00000001111(ID1);ENSOARG00000002484(CREBBP);ENSOARG00000006779(INHBE);ENSOARG00000007318(ID3);ENSOARG00000008119(FST);ENSOARG00000014624(PPP2R1B);ENSOARG00000015180(BAMBI);ENSOARG00000015737(DCN);ENSOARG00000017641(BMPR2);ENSOARG00000017943(EP300);ENSOARG00000020058(THBS1)	K04680+K04498+K22689+K17694+K04661+K03456+K10162+K04660+K04671+K04498+K16857
Environmental Information Processing	Signal transduction	TNF signaling pathway	13	100	0.002722494	5.063839e-02	ko04668	ENSOARG00000000569(TNFAIP3);ENSOARG00000004058(IKBKG);ENSOARG00000006356(BIRC3);ENSOARG00000006491(BIRC2);ENSOARG00000007592(PTGS2);ENSOARG00000007664(PIK3CD);ENSOARG00000009999(JUN);ENSOARG00000010523(JAG1);ENSOARG00000012718(NFKB1);ENSOARG00000013869(MAP2K6);ENSOARG00000015078(IRF1);ENSOARG00000016922(CASP8);ENSOARG00000020866(IL1B)	K11859+K07210+K16060+K16060+K11987+K00922+K04448+K06052+K02580+K04433+K09444+K04398+K04519
Cellular Processes	Cell growth and death	Cellular senescence	16	138	0.003080638	5.371863e-02	ko04218	ENSOARG00000002683(SQSTM1);ENSOARG00000002738(MTOR);ENSOARG00000003547(MYBL2);ENSOARG00000004318(CDK1);ENSOARG00000005759(-);ENSOARG00000007137(RRAS2);ENSOARG00000007664(PIK3CD);ENSOARG00000009908(-);ENSOARG00000011356(GADD45A);ENSOARG00000012718(NFKB1);ENSOARG00000013636(CDKN1A);ENSOARG00000013869(MAP2K6);ENSOARG00000014176(CCNA2);ENSOARG00000020836(CCNB2);ENSOARG00000020877(IL1A);ENSOARG0000002…	K14381+K07203+K21769+K02087+K05868+K07830+K00922+K21771+K04402+K02580+K06625+K04433+K06627+K21770+K04383+K05868
Environmental Information Processing	Signal transduction	NF-kappa B signaling pathway	11	79	0.003307119	5.390934e-02	ko04064	ENSOARG00000000483(NFKB2);ENSOARG00000000569(TNFAIP3);ENSOARG00000001700(PLCG1);ENSOARG00000004058(IKBKG);ENSOARG00000004356(CARD11);ENSOARG00000006356(BIRC3);ENSOARG00000006491(BIRC2);ENSOARG00000007592(PTGS2);ENSOARG00000012564(ERC1);ENSOARG00000012718(NFKB1);ENSOARG00000020866(IL1B)	K04469+K11859+K01116+K07210+K07367+K16060+K16060+K11987+K16072+K02580+K04519
Organismal Systems	Immune system	C-type lectin receptor signaling pathway	12	91	0.003478022	5.390934e-02	ko04625	ENSOARG00000000483(NFKB2);ENSOARG00000004058(IKBKG);ENSOARG00000007137(RRAS2);ENSOARG00000007591(NLRP3);ENSOARG00000007592(PTGS2);ENSOARG00000007664(PIK3CD);ENSOARG00000009999(JUN);ENSOARG00000012718(NFKB1);ENSOARG00000015078(IRF1);ENSOARG00000016922(CASP8);ENSOARG00000018775(CBLB);ENSOARG00000020866(IL1B)	K04469+K07210+K07830+K12800+K11987+K00922+K04448+K02580+K09444+K04398+K22517+K04519
Genetic Information Processing	Replication and repair	Nucleotide excision repair	12	92	0.003810055	5.536354e-02	ko03420	ENSOARG00000000732(XPC);ENSOARG00000008074(CUL4A);ENSOARG00000010697(RFC3);ENSOARG00000011737(RFC2);ENSOARG00000020607(POLE2);MSTRG.12547(--);MSTRG.1267(--);MSTRG.16469(--);MSTRG.17756(--);MSTRG.25063(--);MSTRG.25642(--);MSTRG.28440(--)	K10838+K10609+K10756+K10755+K02325+K10838+K10838+K10838+K10838+K10838+K10838+K10838
Environmental Information Processing	Signal transduction	HIF-1 signaling pathway	12	93	0.004167148	5.536354e-02	ko04066	ENSOARG00000000285(INSR);ENSOARG00000000873(PRKCG);ENSOARG00000001700(PLCG1);ENSOARG00000002484(CREBBP);ENSOARG00000002738(MTOR);ENSOARG00000005506(ENO3);ENSOARG00000007664(PIK3CD);ENSOARG00000008334(VEGFA);ENSOARG00000012718(NFKB1);ENSOARG00000013636(CDKN1A);ENSOARG00000017943(EP300);ENSOARG00000020471(SLC2A1)	K04527+K19663+K01116+K04498+K07203+K01689+K00922+K05448+K02580+K06625+K04498+K07299
Environmental Information Processing	Signal transduction	Phosphatidylinositol signaling system	12	93	0.004167148	5.536354e-02	ko04070	ENSOARG00000000873(PRKCG);ENSOARG00000001700(PLCG1);ENSOARG00000004304(SYNJ2);ENSOARG00000006616(DGKE);ENSOARG00000007664(PIK3CD);ENSOARG00000008648(MTMR2);ENSOARG00000009749(PLCD3);ENSOARG00000010381(PPIP5K1);ENSOARG00000012783(INPP5K);ENSOARG00000013414(SYNJ1);ENSOARG00000019028(PIKFYVE);ENSOARG00000019293(DGKD)	K19663+K01116+K20279+K00901+K00922+K18081+K05857+K13024+K01106+K20279+K00921+K00901
Environmental Information Processing	Signal transduction	Notch signaling pathway	7	39	0.004417834	5.602617e-02	ko04330	ENSOARG00000002484(CREBBP);ENSOARG00000006843(NUMBL);ENSOARG00000010523(JAG1);ENSOARG00000015165(ADAM17);ENSOARG00000017943(EP300);ENSOARG00000020422(HES1);ENSOARG00000020442(NOTCH2)	K04498+K06057+K06052+K06059+K04498+K06054+K20994
Human Diseases	Infectious diseases	Pertussis	10	72	0.005099231	6.174807e-02	ko05133	ENSOARG00000001755(-);ENSOARG00000001878(-);ENSOARG00000005384(-);ENSOARG00000007591(NLRP3);ENSOARG00000009999(JUN);ENSOARG00000012718(NFKB1);ENSOARG00000015078(IRF1);ENSOARG00000016181(ITGA5);ENSOARG00000020866(IL1B);ENSOARG00000020877(IL1A)	K03989+K03989+K03990+K12800+K04448+K02580+K09444+K06484+K04519+K04383
Human Diseases	Cancers	Proteoglycans in cancer	18	172	0.005311662	6.174807e-02	ko05205	ENSOARG00000000873(PRKCG);ENSOARG00000001576(FGFR1);ENSOARG00000001700(PLCG1);ENSOARG00000002688(ANK1);ENSOARG00000002738(MTOR);ENSOARG00000003418(PTK2);ENSOARG00000007137(RRAS2);ENSOARG00000007664(PIK3CD);ENSOARG00000008212(ITGA2);ENSOARG00000008334(VEGFA);ENSOARG00000008867(PLAUR);ENSOARG00000010448(ERBB3);ENSOARG00000012724(FLNB);ENSOARG00000013636(CDKN1A);ENSOARG00000015737(DCN);ENSOARG000000…	K19663+K04362+K01116+K10380+K07203+K05725+K07830+K00922+K06481+K05448+K03985+K05084+K04437+K06625+K04660+K06484+K16857+K03099
Environmental Information Processing	Signal transduction	FoxO signaling pathway	14	122	0.006001316	6.697469e-02	ko04068	ENSOARG00000000285(INSR);ENSOARG00000002484(CREBBP);ENSOARG00000005759(-);ENSOARG00000007234(PLK2);ENSOARG00000007664(PIK3CD);ENSOARG00000009908(-);ENSOARG00000011356(GADD45A);ENSOARG00000013636(CDKN1A);ENSOARG00000017343(PLK1);ENSOARG00000017943(EP300);ENSOARG00000020487(BCL6);ENSOARG00000020627(SOS2);ENSOARG00000020836(CCNB2);ENSOARG00000021023(-)	K04527+K04498+K05868+K08861+K00922+K21771+K04402+K06625+K06631+K04498+K15618+K03099+K21770+K05868
Human Diseases	Infectious diseases	Kaposi sarcoma-associated herpesvirus infection	16	149	0.006550729	7.029436e-02	ko05167	ENSOARG00000001700(PLCG1);ENSOARG00000002484(CREBBP);ENSOARG00000002738(MTOR);ENSOARG00000004058(IKBKG);ENSOARG00000005384(-);ENSOARG00000007592(PTGS2);ENSOARG00000007664(PIK3CD);ENSOARG00000008334(VEGFA);ENSOARG00000009999(JUN);ENSOARG00000012673(RCAN1);ENSOARG00000012718(NFKB1);ENSOARG00000013636(CDKN1A);ENSOARG00000013869(MAP2K6);ENSOARG00000016012(TYK2);ENSOARG00000016922(CASP8);ENSOARG000000…	K01116+K04498+K07203+K07210+K03990+K11987+K00922+K05448+K04448+K17901+K02580+K06625+K04433+K11219+K04398+K04498
Human Diseases	Cancers	Pathways in cancer	40	501	0.007777905	8.037168e-02	ko05200	ENSOARG00000000483(NFKB2);ENSOARG00000000873(PRKCG);ENSOARG00000001576(FGFR1);ENSOARG00000001700(PLCG1);ENSOARG00000002484(CREBBP);ENSOARG00000002738(MTOR);ENSOARG00000003418(PTK2);ENSOARG00000003455(CDH1);ENSOARG00000004058(IKBKG);ENSOARG00000006356(BIRC3);ENSOARG00000006491(BIRC2);ENSOARG00000006679(ARHGEF11);ENSOARG00000007419(ABL1);ENSOARG00000007545(EML4);ENSOARG00000007592(PTGS2);ENSOARG000…	K04469+K19663+K04362+K01116+K04498+K07203+K05725+K05689+K07210+K16060+K16060+K12331+K06619+K15420+K11987+K00922+K06481+K05448+K06476+K08803+K04448+K06052+K04402+K18806+K02580+K06625+K02085+K22182+K04398+K04498+K06054+K20994+K07299+K06237+K03099+K05691+K05691+K05691+K05691+K05691
Human Diseases	Infectious diseases	Epstein-Barr virus infection	17	168	0.009240023	8.840840e-02	ko05169	ENSOARG00000000483(NFKB2);ENSOARG00000000569(TNFAIP3);ENSOARG00000001700(PLCG1);ENSOARG00000002484(CREBBP);ENSOARG00000004058(IKBKG);ENSOARG00000004318(CDK1);ENSOARG00000007664(PIK3CD);ENSOARG00000009656(POLR3A);ENSOARG00000009999(JUN);ENSOARG00000012718(NFKB1);ENSOARG00000013636(CDKN1A);ENSOARG00000013869(MAP2K6);ENSOARG00000013874(-);ENSOARG00000014176(CCNA2);ENSOARG00000016012(TYK2);ENSOARG000…	K04469+K11859+K01116+K04498+K07210+K02087+K00922+K03018+K04448+K02580+K06625+K04433+K03006+K06627+K11219+K04498+K08860
Organismal Systems	Immune system	IL-17 signaling pathway	10	79	0.009803068	8.840840e-02	ko04657	ENSOARG00000000072(FOSL1);ENSOARG00000000417(S100A9);ENSOARG00000000569(TNFAIP3);ENSOARG00000004058(IKBKG);ENSOARG00000004790(MMP13);ENSOARG00000007592(PTGS2);ENSOARG00000009999(JUN);ENSOARG00000012718(NFKB1);ENSOARG00000016922(CASP8);ENSOARG00000020866(IL1B)	K04502+K21128+K11859+K07210+K07994+K11987+K04448+K02580+K04398+K04519
Organismal Systems	Development	Osteoclast differentiation	12	104	0.01014948	8.840840e-02	ko04380	ENSOARG00000000072(FOSL1);ENSOARG00000000483(NFKB2);ENSOARG00000002683(SQSTM1);ENSOARG00000004058(IKBKG);ENSOARG00000007664(PIK3CD);ENSOARG00000009999(JUN);ENSOARG00000012718(NFKB1);ENSOARG00000013869(MAP2K6);ENSOARG00000016012(TYK2);ENSOARG00000017000(TEC);ENSOARG00000020866(IL1B);ENSOARG00000020877(IL1A)	K04502+K04469+K14381+K07210+K00922+K04448+K02580+K04433+K11219+K07364+K04519+K04383
Organismal Systems	Endocrine system	Thyroid hormone signaling pathway	12	104	0.01014948	8.840840e-02	ko04919	ENSOARG00000000873(PRKCG);ENSOARG00000001621(MED14);ENSOARG00000001700(PLCG1);ENSOARG00000002484(CREBBP);ENSOARG00000002738(MTOR);ENSOARG00000007664(PIK3CD);ENSOARG00000009749(PLCD3);ENSOARG00000012673(RCAN1);ENSOARG00000016238(MED12);ENSOARG00000017943(EP300);ENSOARG00000020442(NOTCH2);ENSOARG00000020471(SLC2A1)	K19663+K15156+K01116+K04498+K07203+K00922+K05857+K17901+K15162+K04498+K20994+K07299
Human Diseases	Infectious diseases	Herpes simplex infection	16	157	0.01066892	8.840840e-02	ko05168	ENSOARG00000002484(CREBBP);ENSOARG00000004058(IKBKG);ENSOARG00000004318(CDK1);ENSOARG00000005384(-);ENSOARG00000007335(DYA);ENSOARG00000009999(JUN);ENSOARG00000012718(NFKB1);ENSOARG00000013874(-);ENSOARG00000014879(TAF4);ENSOARG00000016012(TYK2);ENSOARG00000016922(CASP8);ENSOARG00000017354(NXF1);ENSOARG00000017943(EP300);ENSOARG00000018911(-);ENSOARG00000020774(EIF2AK3);ENSOARG00000020866(IL1B)	K04498+K07210+K02087+K03990+K06752+K04448+K02580+K03006+K03129+K11219+K04398+K14284+K04498+K21944+K08860+K04519
Environmental Information Processing	Signal transduction	MAPK signaling pathway	23	255	0.01075613	8.840840e-02	ko04010	ENSOARG00000000285(INSR);ENSOARG00000000483(NFKB2);ENSOARG00000000873(PRKCG);ENSOARG00000001576(FGFR1);ENSOARG00000004058(IKBKG);ENSOARG00000006643(RASA2);ENSOARG00000007137(RRAS2);ENSOARG00000007360(DUSP9);ENSOARG00000008162(MAP4K3);ENSOARG00000008334(VEGFA);ENSOARG00000009999(JUN);ENSOARG00000010448(ERBB3);ENSOARG00000011356(GADD45A);ENSOARG00000012718(NFKB1);ENSOARG00000012724(FLNB);ENSOARG000…	K04527+K04469+K19663+K04362+K07210+K08053+K07830+K18498+K04406+K05448+K04448+K05084+K04402+K02580+K04437+K20216+K04433+K04465+K04864+K03099+K04519+K04383+K04855
Cellular Processes	Transport and catabolism	Mitophagy - animal	8	57	0.01105742	8.840840e-02	ko04137	ENSOARG00000002683(SQSTM1);ENSOARG00000007137(RRAS2);ENSOARG00000009999(JUN);ENSOARG00000011157(TFE3);ENSOARG00000013499(ULK1);ENSOARG00000017038(USP30);ENSOARG00000020774(EIF2AK3);MSTRG.27835(--)	K14381+K07830+K04448+K09105+K21357+K11851+K08860+K21361
Cellular Processes	Cellular community - eukaryotes	Focal adhesion	18	185	0.01109066	8.840840e-02	ko04510	ENSOARG00000000873(PRKCG);ENSOARG00000002590(SPP1);ENSOARG00000003199(SHC1);ENSOARG00000003418(PTK2);ENSOARG00000006356(BIRC3);ENSOARG00000006491(BIRC2);ENSOARG00000006521(RAPGEF1);ENSOARG00000007664(PIK3CD);ENSOARG00000008212(ITGA2);ENSOARG00000008334(VEGFA);ENSOARG00000008370(GPATCH8);ENSOARG00000009999(JUN);ENSOARG00000012724(FLNB);ENSOARG00000016181(ITGA5);ENSOARG00000020058(THBS1);ENSOARG000…	K19663+K06250+K06279+K05725+K16060+K16060+K06277+K00922+K06481+K05448+K06476+K04448+K04437+K06484+K16857+K06237+K03099+K06586
Human Diseases	Cancers	Transcriptional misregulation in cancers	15	147	0.01305546	1.011798e-01	ko05202	ENSOARG00000003418(PTK2);ENSOARG00000004234(SLC45A3);ENSOARG00000004421(CDKN2C);ENSOARG00000004601(JMJD1C);ENSOARG00000005637(ETV4);ENSOARG00000009830(-);ENSOARG00000011157(TFE3);ENSOARG00000011259(CCNT2);ENSOARG00000011356(GADD45A);ENSOARG00000012718(NFKB1);ENSOARG00000013636(CDKN1A);ENSOARG00000014177(DOT1L);ENSOARG00000017427(LDB1);ENSOARG00000018628(NFKBIZ);ENSOARG00000020487(BCL6)	K05725+K15379+K06622+K11449+K15592+K09186+K09105+K15188+K04402+K02580+K06625+K11427+K15617+K14242+K15618
Human Diseases	Drug resistance	Endocrine resistance	10	84	0.0148048	1.106068e-01	ko01522	ENSOARG00000002738(MTOR);ENSOARG00000003199(SHC1);ENSOARG00000003418(PTK2);ENSOARG00000004421(CDKN2C);ENSOARG00000007664(PIK3CD);ENSOARG00000009999(JUN);ENSOARG00000010523(JAG1);ENSOARG00000013636(CDKN1A);ENSOARG00000020442(NOTCH2);ENSOARG00000020627(SOS2)	K07203+K06279+K05725+K06622+K00922+K04448+K06052+K06625+K20994+K03099
Human Diseases	Endocrine and metabolic diseases	AGE-RAGE signaling pathway in diabetic complications	11	97	0.0153077	1.106068e-01	ko04933	ENSOARG00000001700(PLCG1);ENSOARG00000007664(PIK3CD);ENSOARG00000008334(VEGFA);ENSOARG00000009749(PLCD3);ENSOARG00000009999(JUN);ENSOARG00000012718(NFKB1);ENSOARG00000016470(EGR1);ENSOARG00000016476(COL3A1);ENSOARG00000020525(COL4A3);ENSOARG00000020866(IL1B);ENSOARG00000020877(IL1A)	K01116+K00922+K05448+K05857+K04448+K02580+K09203+K19720+K06237+K04519+K04383
Human Diseases	Cardiovascular diseases	Arrhythmogenic right ventricular cardiomyopathy (ARVC)	12	110	0.01546117	1.106068e-01	ko05412	ENSOARG00000008212(ITGA2);ENSOARG00000008370(GPATCH8);ENSOARG00000016181(ITGA5);ENSOARG00000017552(DSP);ENSOARG00000019143(CACNB3);ENSOARG00000020185(DES);ENSOARG00000020629(ITGA10);MSTRG.13355(--);MSTRG.15195(--);MSTRG.15198(--);MSTRG.23431(--);MSTRG.2616(--)	K06481+K06476+K06484+K10381+K04864+K07610+K06586+K05691+K05691+K05691+K05691+K05691
Human Diseases	Cancers	Breast cancer	13	128	0.0207879	1.414497e-01	ko05224	ENSOARG00000000483(NFKB2);ENSOARG00000001576(FGFR1);ENSOARG00000002738(MTOR);ENSOARG00000003199(SHC1);ENSOARG00000007664(PIK3CD);ENSOARG00000009999(JUN);ENSOARG00000010523(JAG1);ENSOARG00000011356(GADD45A);ENSOARG00000013636(CDKN1A);ENSOARG00000016130(APC);ENSOARG00000020422(HES1);ENSOARG00000020442(NOTCH2);ENSOARG00000020627(SOS2)	K04469+K04362+K07203+K06279+K00922+K04448+K06052+K04402+K06625+K02085+K06054+K20994+K03099
Organismal Systems	Immune system	Complement and coagulation cascades	9	76	0.0209076	1.414497e-01	ko04610	ENSOARG00000000291(FGB);ENSOARG00000001755(-);ENSOARG00000001878(-);ENSOARG00000005384(-);ENSOARG00000006889(-);ENSOARG00000008867(PLAUR);ENSOARG00000009130(ITGAX);ENSOARG00000010165(-);ENSOARG00000016733(FGA)	K03904+K03989+K03989+K03990+K19821+K03985+K06462+K03991+K03903
Environmental Information Processing	Signal transduction	AMPK signaling pathway	12	116	0.0226543	1.414497e-01	ko04152	ENSOARG00000000285(INSR);ENSOARG00000001610(-);ENSOARG00000002738(MTOR);ENSOARG00000005886(PFKFB1);ENSOARG00000007664(PIK3CD);ENSOARG00000008650(FBP1);ENSOARG00000008668(FBP2);ENSOARG00000012463(GYS1);ENSOARG00000013499(ULK1);ENSOARG00000014176(CCNA2);ENSOARG00000014624(PPP2R1B);ENSOARG00000016724(HMGCR)	K04527+K16333+K07203+K19028+K00922+K03841+K03841+K00693+K21357+K06627+K03456+K00021
Cellular Processes	Cellular community - eukaryotes	Adherens junction	12	116	0.0226543	1.414497e-01	ko04520	ENSOARG00000000285(INSR);ENSOARG00000000454(PTPRF);ENSOARG00000001576(FGFR1);ENSOARG00000002484(CREBBP);ENSOARG00000003455(CDH1);ENSOARG00000008199(PTPRJ);ENSOARG00000017943(EP300);MSTRG.13355(--);MSTRG.15195(--);MSTRG.15198(--);MSTRG.23431(--);MSTRG.2616(--)	K04527+K05695+K04362+K04498+K05689+K05698+K04498+K05691+K05691+K05691+K05691+K05691
Human Diseases	Cancers	Endometrial cancer	11	103	0.02303979	1.414497e-01	ko05213	ENSOARG00000003455(CDH1);ENSOARG00000007664(PIK3CD);ENSOARG00000011356(GADD45A);ENSOARG00000013636(CDKN1A);ENSOARG00000016130(APC);ENSOARG00000020627(SOS2);MSTRG.13355(--);MSTRG.15195(--);MSTRG.15198(--);MSTRG.23431(--);MSTRG.2616(--)	K05689+K00922+K04402+K06625+K02085+K03099+K05691+K05691+K05691+K05691+K05691
Human Diseases	Cancers	Glioma	8	65	0.0232591	1.414497e-01	ko05214	ENSOARG00000000873(PRKCG);ENSOARG00000001700(PLCG1);ENSOARG00000002738(MTOR);ENSOARG00000003199(SHC1);ENSOARG00000007664(PIK3CD);ENSOARG00000011356(GADD45A);ENSOARG00000013636(CDKN1A);ENSOARG00000020627(SOS2)	K19663+K01116+K07203+K06279+K00922+K04402+K06625+K03099
Human Diseases	Cardiovascular diseases	Fluid shear stress and atherosclerosis	13	130	0.02332146	1.414497e-01	ko05418	ENSOARG00000002683(SQSTM1);ENSOARG00000003418(PTK2);ENSOARG00000004058(IKBKG);ENSOARG00000005093(ARHGEF2);ENSOARG00000007664(PIK3CD);ENSOARG00000008334(VEGFA);ENSOARG00000008370(GPATCH8);ENSOARG00000009999(JUN);ENSOARG00000012718(NFKB1);ENSOARG00000013869(MAP2K6);ENSOARG00000017641(BMPR2);ENSOARG00000020866(IL1B);ENSOARG00000020877(IL1A)	K14381+K05725+K07210+K12791+K00922+K05448+K06476+K04448+K02580+K04433+K04671+K04519+K04383
Cellular Processes	Cell growth and death	Apoptosis	12	119	0.02706213	1.606454e-01	ko04210	ENSOARG00000004058(IKBKG);ENSOARG00000006356(BIRC3);ENSOARG00000006491(BIRC2);ENSOARG00000007664(PIK3CD);ENSOARG00000009999(JUN);ENSOARG00000011356(GADD45A);ENSOARG00000012718(NFKB1);ENSOARG00000013739(TUBA8);ENSOARG00000014597(DFFB);ENSOARG00000016922(CASP8);ENSOARG00000018142(LMNB1);ENSOARG00000020774(EIF2AK3)	K07210+K16060+K16060+K00922+K04448+K04402+K02580+K07374+K02311+K04398+K07611+K08860
Genetic Information Processing	Translation	mRNA surveillance pathway	9	81	0.03027956	1.759834e-01	ko03015	ENSOARG00000001352(SMG7);ENSOARG00000001563(PAPOLG);ENSOARG00000008616(PNN);ENSOARG00000010739(UPF1);ENSOARG00000010928(SMG1);ENSOARG00000013239(CASC3);ENSOARG00000014624(PPP2R1B);ENSOARG00000017354(NXF1);ENSOARG00000019368(ACIN1)	K14409+K14376+K13114+K14326+K08873+K14323+K03456+K14284+K12875
Environmental Information Processing	Signal transduction	PI3K-Akt signaling pathway	25	312	0.0309416	1.759834e-01	ko04151	ENSOARG00000000285(INSR);ENSOARG00000001576(FGFR1);ENSOARG00000001610(-);ENSOARG00000002590(SPP1);ENSOARG00000002738(MTOR);ENSOARG00000003418(PTK2);ENSOARG00000003862(PHLPP2);ENSOARG00000004058(IKBKG);ENSOARG00000007664(PIK3CD);ENSOARG00000008212(ITGA2);ENSOARG00000008334(VEGFA);ENSOARG00000008370(GPATCH8);ENSOARG00000009570(PKN3);ENSOARG00000009845(OSMR);ENSOARG00000010448(ERBB3);ENSOARG00000012…	K04527+K04362+K16333+K06250+K07203+K05725+K16340+K07210+K00922+K06481+K05448+K06476+K06071+K05057+K05084+K00693+K02580+K06625+K03456+K06484+K04465+K16857+K06237+K03099+K06586
Human Diseases	Cancers	Chronic myeloid leukemia	8	69	0.03200681	1.759834e-01	ko05220	ENSOARG00000003199(SHC1);ENSOARG00000004058(IKBKG);ENSOARG00000007419(ABL1);ENSOARG00000007664(PIK3CD);ENSOARG00000011356(GADD45A);ENSOARG00000012718(NFKB1);ENSOARG00000013636(CDKN1A);ENSOARG00000020627(SOS2)	K06279+K07210+K06619+K00922+K04402+K02580+K06625+K03099
Metabolism	Nucleotide metabolism	Pyrimidine metabolism	10	95	0.03216901	1.759834e-01	ko00240	ENSOARG00000005673(TK1);ENSOARG00000008185(-);ENSOARG00000009656(POLR3A);ENSOARG00000013874(-);ENSOARG00000014074(UPB1);ENSOARG00000015333(RRM2);ENSOARG00000016081(-);ENSOARG00000017620(DTYMK);ENSOARG00000020601(POLR1A);ENSOARG00000020607(POLE2)	K00857+K02684+K03018+K03006+K01431+K10808+K00757+K00943+K02999+K02325
Metabolism	Carbohydrate metabolism	Inositol phosphate metabolism	8	71	0.03712771	1.992044e-01	ko00562	ENSOARG00000001700(PLCG1);ENSOARG00000004304(SYNJ2);ENSOARG00000007664(PIK3CD);ENSOARG00000008648(MTMR2);ENSOARG00000009749(PLCD3);ENSOARG00000012783(INPP5K);ENSOARG00000013414(SYNJ1);ENSOARG00000019028(PIKFYVE)	K01116+K20279+K00922+K18081+K05857+K01106+K20279+K00921
Human Diseases	Drug resistance	Antifolate resistance	5	35	0.03864956	1.996894e-01	ko01523	ENSOARG00000003559(ABCC3);ENSOARG00000004058(IKBKG);ENSOARG00000012718(NFKB1);ENSOARG00000020631(ABCC5);ENSOARG00000020866(IL1B)	K05667+K07210+K02580+K05668+K04519
Human Diseases	Cancers	Bladder cancer	5	35	0.03864956	1.996894e-01	ko05219	ENSOARG00000003455(CDH1);ENSOARG00000008334(VEGFA);ENSOARG00000008706(DAPK1);ENSOARG00000013636(CDKN1A);ENSOARG00000020058(THBS1)	K05689+K05448+K08803+K06625+K16857
Human Diseases	Cancers	Non-small cell lung cancer	7	60	0.04221771	2.105009e-01	ko05223	ENSOARG00000000873(PRKCG);ENSOARG00000001700(PLCG1);ENSOARG00000007545(EML4);ENSOARG00000007664(PIK3CD);ENSOARG00000011356(GADD45A);ENSOARG00000013636(CDKN1A);ENSOARG00000020627(SOS2)	K19663+K01116+K15420+K00922+K04402+K06625+K03099
Human Diseases	Cancers	Prostate cancer	9	86	0.04225108	2.105009e-01	ko05215	ENSOARG00000001576(FGFR1);ENSOARG00000002484(CREBBP);ENSOARG00000002738(MTOR);ENSOARG00000004058(IKBKG);ENSOARG00000007664(PIK3CD);ENSOARG00000012718(NFKB1);ENSOARG00000013636(CDKN1A);ENSOARG00000017943(EP300);ENSOARG00000020627(SOS2)	K04362+K04498+K07203+K07210+K00922+K02580+K06625+K04498+K03099
Organismal Systems	Endocrine system	Insulin signaling pathway	12	128	0.04399846	2.153609e-01	ko04910	ENSOARG00000000285(INSR);ENSOARG00000000454(PTPRF);ENSOARG00000002738(MTOR);ENSOARG00000003199(SHC1);ENSOARG00000004229(PKLR);ENSOARG00000006521(RAPGEF1);ENSOARG00000007664(PIK3CD);ENSOARG00000008650(FBP1);ENSOARG00000008668(FBP2);ENSOARG00000012463(GYS1);ENSOARG00000018775(CBLB);ENSOARG00000020627(SOS2)	K04527+K05695+K07203+K06279+K12406+K06277+K00922+K03841+K03841+K00693+K22517+K03099
Organismal Systems	Immune system	NOD-like receptor signaling pathway	13	143	0.04565347	2.160080e-01	ko04621	ENSOARG00000000569(TNFAIP3);ENSOARG00000004058(IKBKG);ENSOARG00000006356(BIRC3);ENSOARG00000006491(BIRC2);ENSOARG00000007591(NLRP3);ENSOARG00000009999(JUN);ENSOARG00000010147(TP53BP1);ENSOARG00000012718(NFKB1);ENSOARG00000015072(-);ENSOARG00000016012(TYK2);ENSOARG00000016922(CASP8);ENSOARG00000020658(TXNIP);ENSOARG00000020866(IL1B)	K11859+K07210+K16060+K16060+K12800+K04448+K20915+K02580+K20899+K11219+K04398+K20910+K04519
Human Diseases	Drug resistance	EGFR tyrosine kinase inhibitor resistance	8	74	0.0457976	2.160080e-01	ko01521	ENSOARG00000000873(PRKCG);ENSOARG00000001700(PLCG1);ENSOARG00000002738(MTOR);ENSOARG00000003199(SHC1);ENSOARG00000007664(PIK3CD);ENSOARG00000008334(VEGFA);ENSOARG00000010448(ERBB3);ENSOARG00000020627(SOS2)	K19663+K01116+K07203+K06279+K00922+K05448+K05084+K03099
Human Diseases	Infectious diseases	Bacterial invasion of epithelial cells	11	115	0.04645333	2.160080e-01	ko05100	ENSOARG00000003199(SHC1);ENSOARG00000003418(PTK2);ENSOARG00000003455(CDH1);ENSOARG00000007664(PIK3CD);ENSOARG00000008824(ELMO2);ENSOARG00000016181(ITGA5);MSTRG.13355(--);MSTRG.15195(--);MSTRG.15198(--);MSTRG.23431(--);MSTRG.2616(--)	K06279+K05725+K05689+K00922+K18985+K06484+K05691+K05691+K05691+K05691+K05691
Organismal Systems	Immune system	Toll-like receptor signaling pathway	9	88	0.04782408	2.187364e-01	ko04620	ENSOARG00000002590(SPP1);ENSOARG00000004058(IKBKG);ENSOARG00000007664(PIK3CD);ENSOARG00000009999(JUN);ENSOARG00000011288(TLR7);ENSOARG00000012718(NFKB1);ENSOARG00000013869(MAP2K6);ENSOARG00000016922(CASP8);ENSOARG00000020866(IL1B)	K06250+K07210+K00922+K04448+K05404+K02580+K04433+K04398+K04519
Organismal Systems	Immune system	Th1 and Th2 cell differentiation	8	77	0.05569954	2.469018e-01	ko04658	ENSOARG00000001700(PLCG1);ENSOARG00000004058(IKBKG);ENSOARG00000007335(DYA);ENSOARG00000009999(JUN);ENSOARG00000010523(JAG1);ENSOARG00000012718(NFKB1);ENSOARG00000016012(TYK2);ENSOARG00000020442(NOTCH2)	K01116+K07210+K06752+K04448+K06052+K02580+K11219+K20994
Cellular Processes	Cell motility	Regulation of actin cytoskeleton	16	192	0.05614998	2.469018e-01	ko04810	ENSOARG00000001576(FGFR1);ENSOARG00000003418(PTK2);ENSOARG00000007108(ARHGEF7);ENSOARG00000007137(RRAS2);ENSOARG00000007664(PIK3CD);ENSOARG00000007782(GIT1);ENSOARG00000008212(ITGA2);ENSOARG00000008370(GPATCH8);ENSOARG00000009130(ITGAX);ENSOARG00000015785(CYFIP1);ENSOARG00000016130(APC);ENSOARG00000016133(NCKAP1L);ENSOARG00000016181(ITGA5);ENSOARG00000019028(PIKFYVE);ENSOARG00000020627(SOS2);ENSO…	K04362+K05725+K13710+K07830+K00922+K05737+K06481+K06476+K06462+K05749+K02085+K05750+K06484+K00921+K03099+K06586
Human Diseases	Infectious diseases	Leishmaniasis	7	64	0.05663698	2.469018e-01	ko05140	ENSOARG00000005384(-);ENSOARG00000007335(DYA);ENSOARG00000007592(PTGS2);ENSOARG00000009999(JUN);ENSOARG00000012718(NFKB1);ENSOARG00000020866(IL1B);ENSOARG00000020877(IL1A)	K03990+K06752+K11987+K04448+K02580+K04519+K04383
Environmental Information Processing	Signaling molecules and interaction	ECM-receptor interaction	8	78	0.0592809	2.544519e-01	ko04512	ENSOARG00000002590(SPP1);ENSOARG00000007039(-);ENSOARG00000008212(ITGA2);ENSOARG00000008370(GPATCH8);ENSOARG00000016181(ITGA5);ENSOARG00000020058(THBS1);ENSOARG00000020525(COL4A3);ENSOARG00000020629(ITGA10)	K06250+K06254+K06481+K06476+K06484+K16857+K06237+K06586
Human Diseases	Cancers	Viral carcinogenesis	15	181	0.06552349	2.769857e-01	ko05203	ENSOARG00000000483(NFKB2);ENSOARG00000002484(CREBBP);ENSOARG00000004058(IKBKG);ENSOARG00000004318(CDK1);ENSOARG00000005384(-);ENSOARG00000006643(RASA2);ENSOARG00000007664(PIK3CD);ENSOARG00000009999(JUN);ENSOARG00000012718(NFKB1);ENSOARG00000013636(CDKN1A);ENSOARG00000014176(CCNA2);ENSOARG00000016922(CASP8);ENSOARG00000017943(EP300);ENSOARG00000019375(HDAC7);ENSOARG00000020542(CDC20)	K04469+K04498+K07210+K02087+K03990+K08053+K00922+K04448+K02580+K06625+K06627+K04398+K04498+K11408+K03363
Environmental Information Processing	Signal transduction	VEGF signaling pathway	6	54	0.07027774	2.916028e-01	ko04370	ENSOARG00000000873(PRKCG);ENSOARG00000001700(PLCG1);ENSOARG00000003418(PTK2);ENSOARG00000007592(PTGS2);ENSOARG00000007664(PIK3CD);ENSOARG00000008334(VEGFA)	K19663+K01116+K05725+K11987+K00922+K05448
Organismal Systems	Immune system	T cell receptor signaling pathway	9	95	0.07107165	2.916028e-01	ko04660	ENSOARG00000001700(PLCG1);ENSOARG00000004058(IKBKG);ENSOARG00000004356(CARD11);ENSOARG00000007664(PIK3CD);ENSOARG00000009999(JUN);ENSOARG00000012718(NFKB1);ENSOARG00000017000(TEC);ENSOARG00000018775(CBLB);ENSOARG00000020627(SOS2)	K01116+K07210+K07367+K00922+K04448+K02580+K07364+K22517+K03099
Metabolism	Global and overview maps	Carbon metabolism	10	111	0.07743557	3.131090e-01	ko01200	ENSOARG00000004229(PKLR);ENSOARG00000004237(G6PD);ENSOARG00000005506(ENO3);ENSOARG00000007263(SDSL);ENSOARG00000008650(FBP1);ENSOARG00000008668(FBP2);ENSOARG00000013672(GLDC);ENSOARG00000020412(PHGDH);ENSOARG00000020569(EHHADH);MSTRG.2726(GLUD1)	K12406+K00036+K01689+K17989+K03841+K03841+K00281+K00058+K07514+K00261
Human Diseases	Infectious diseases	Hepatitis C	10	112	0.0811549	3.234602e-01	ko05160	ENSOARG00000004058(IKBKG);ENSOARG00000007664(PIK3CD);ENSOARG00000012718(NFKB1);ENSOARG00000013636(CDKN1A);ENSOARG00000014624(PPP2R1B);ENSOARG00000015078(IRF1);ENSOARG00000016012(TYK2);ENSOARG00000017639(LDLR);ENSOARG00000020627(SOS2);ENSOARG00000020774(EIF2AK3)	K07210+K00922+K02580+K06625+K03456+K09444+K11219+K12473+K03099+K08860
Human Diseases	Cancers	Pancreatic cancer	7	70	0.08338634	3.247962e-01	ko05212	ENSOARG00000002738(MTOR);ENSOARG00000004058(IKBKG);ENSOARG00000007664(PIK3CD);ENSOARG00000008334(VEGFA);ENSOARG00000011356(GADD45A);ENSOARG00000012718(NFKB1);ENSOARG00000013636(CDKN1A)	K07203+K07210+K00922+K05448+K04402+K02580+K06625
Metabolism	Carbohydrate metabolism	Fructose and mannose metabolism	4	31	0.08421783	3.247962e-01	ko00051	ENSOARG00000002773(GMDS);ENSOARG00000005886(PFKFB1);ENSOARG00000008650(FBP1);ENSOARG00000008668(FBP2)	K01711+K19028+K03841+K03841
Human Diseases	Infectious diseases	Measles	10	113	0.08498252	3.247962e-01	ko05162	ENSOARG00000000569(TNFAIP3);ENSOARG00000002952(ADAR);ENSOARG00000007664(PIK3CD);ENSOARG00000011288(TLR7);ENSOARG00000012718(NFKB1);ENSOARG00000016012(TYK2);ENSOARG00000018775(CBLB);ENSOARG00000020774(EIF2AK3);ENSOARG00000020866(IL1B);ENSOARG00000020877(IL1A)	K11859+K12968+K00922+K05404+K02580+K11219+K22517+K08860+K04519+K04383
Metabolism	Amino acid metabolism	Cysteine and methionine metabolism	5	44	0.0875667	3.264245e-01	ko00270	ENSOARG00000007070(GCLC);ENSOARG00000007263(SDSL);ENSOARG00000010176(MAT1A);ENSOARG00000018298(DNMT3A);ENSOARG00000019145(TST)	K11204+K17989+K00789+K17398+K01011
Environmental Information Processing	Signal transduction	Hippo signaling pathway	14	174	0.08868332	3.264245e-01	ko04390	ENSOARG00000001111(ID1);ENSOARG00000003455(CDH1);ENSOARG00000013781(PARD6B);ENSOARG00000013966(AFP);ENSOARG00000014240(CCN2);ENSOARG00000014624(PPP2R1B);ENSOARG00000016130(APC);ENSOARG00000017641(BMPR2);ENSOARG00000020699(FRMD6);MSTRG.13355(--);MSTRG.15195(--);MSTRG.15198(--);MSTRG.23431(--);MSTRG.2616(--)	K04680+K05689+K06093+K16144+K06827+K03456+K02085+K04671+K16822+K05691+K05691+K05691+K05691+K05691
Organismal Systems	Nervous system	Neurotrophin signaling pathway	10	114	0.08891849	3.264245e-01	ko04722	ENSOARG00000001700(PLCG1);ENSOARG00000003199(SHC1);ENSOARG00000004971(IRAK2);ENSOARG00000006521(RAPGEF1);ENSOARG00000007419(ABL1);ENSOARG00000007664(PIK3CD);ENSOARG00000009999(JUN);ENSOARG00000012718(NFKB1);ENSOARG00000014712(KIDINS220);ENSOARG00000020627(SOS2)	K01116+K06279+K04731+K06277+K06619+K00922+K04448+K02580+K12460+K03099
Human Diseases	Infectious diseases	Salmonella infection	7	73	0.09907441	3.543208e-01	ko05132	ENSOARG00000008953(PLEKHM2);ENSOARG00000009570(PKN3);ENSOARG00000009999(JUN);ENSOARG00000012718(NFKB1);ENSOARG00000012724(FLNB);ENSOARG00000020866(IL1B);ENSOARG00000020877(IL1A)	K15348+K06071+K04448+K02580+K04437+K04519+K04383
Human Diseases	Endocrine and metabolic diseases	Insulin resistance	9	102	0.1003274	3.543208e-01	ko04931	ENSOARG00000000285(INSR);ENSOARG00000000454(PTPRF);ENSOARG00000001610(-);ENSOARG00000002738(MTOR);ENSOARG00000007664(PIK3CD);ENSOARG00000012001(MLXIP);ENSOARG00000012463(GYS1);ENSOARG00000012718(NFKB1);ENSOARG00000020471(SLC2A1)	K04527+K05695+K16333+K07203+K00922+K09113+K00693+K02580+K07299
Human Diseases	Infectious diseases	Toxoplasmosis	9	102	0.1003274	3.543208e-01	ko05145	ENSOARG00000004058(IKBKG);ENSOARG00000006356(BIRC3);ENSOARG00000006491(BIRC2);ENSOARG00000007335(DYA);ENSOARG00000012718(NFKB1);ENSOARG00000013869(MAP2K6);ENSOARG00000016012(TYK2);ENSOARG00000016922(CASP8);ENSOARG00000017639(LDLR)	K07210+K16060+K16060+K06752+K02580+K04433+K11219+K04398+K12473
Environmental Information Processing	Signal transduction	Rap1 signaling pathway	14	181	0.1127202	3.862171e-01	ko04015	ENSOARG00000000285(INSR);ENSOARG00000000873(PRKCG);ENSOARG00000001111(ID1);ENSOARG00000001160(ARAP3);ENSOARG00000001576(FGFR1);ENSOARG00000001700(PLCG1);ENSOARG00000003455(CDH1);ENSOARG00000006521(RAPGEF1);ENSOARG00000007664(PIK3CD);ENSOARG00000008334(VEGFA);ENSOARG00000008370(GPATCH8);ENSOARG00000013781(PARD6B);ENSOARG00000013869(MAP2K6);ENSOARG00000020058(THBS1)	K04527+K19663+K04680+K12490+K04362+K01116+K05689+K06277+K00922+K05448+K06476+K06093+K04433+K16857
Genetic Information Processing	Folding, sorting and degradation	Ubiquitin mediated proteolysis	10	120	0.1148	3.862171e-01	ko04120	ENSOARG00000000117(-);ENSOARG00000006356(BIRC3);ENSOARG00000006491(BIRC2);ENSOARG00000006520(UBE2C);ENSOARG00000007258(UBE2O);ENSOARG00000007768(HUWE1);ENSOARG00000008074(CUL4A);ENSOARG00000015710(HERC2);ENSOARG00000018775(CBLB);ENSOARG00000020542(CDC20)	K10614+K16060+K16060+K06688+K10581+K10592+K10609+K10595+K22517+K03363
Organismal Systems	Immune system	Cytosolic DNA-sensing pathway	5	48	0.1163543	3.862171e-01	ko04623	ENSOARG00000002952(ADAR);ENSOARG00000004058(IKBKG);ENSOARG00000009656(POLR3A);ENSOARG00000012718(NFKB1);ENSOARG00000020866(IL1B)	K12968+K07210+K03018+K02580+K04519
Human Diseases	Infectious diseases	Staphylococcus aureus infection	5	48	0.1163543	3.862171e-01	ko05150	ENSOARG00000001755(-);ENSOARG00000001878(-);ENSOARG00000005384(-);ENSOARG00000007335(DYA);ENSOARG00000010165(-)	K03989+K03989+K03990+K06752+K03991
Human Diseases	Infectious diseases	Human cytomegalovirus infection	14	182	0.1164427	3.862171e-01	ko05163	ENSOARG00000000873(PRKCG);ENSOARG00000002738(MTOR);ENSOARG00000003418(PTK2);ENSOARG00000004058(IKBKG);ENSOARG00000006679(ARHGEF11);ENSOARG00000007592(PTGS2);ENSOARG00000007664(PIK3CD);ENSOARG00000008334(VEGFA);ENSOARG00000012718(NFKB1);ENSOARG00000013636(CDKN1A);ENSOARG00000013869(MAP2K6);ENSOARG00000016922(CASP8);ENSOARG00000020627(SOS2);ENSOARG00000020866(IL1B)	K19663+K07203+K05725+K07210+K12331+K11987+K00922+K05448+K02580+K06625+K04433+K04398+K03099+K04519
Metabolism	Carbohydrate metabolism	Glycolysis / Gluconeogenesis	6	62	0.1176647	3.862171e-01	ko00010	ENSOARG00000004229(PKLR);ENSOARG00000005506(ENO3);ENSOARG00000007716(BPGM);ENSOARG00000008650(FBP1);ENSOARG00000008668(FBP2);ENSOARG00000008843(GALM)	K12406+K01689+K01837+K03841+K03841+K01785
Human Diseases	Infectious diseases	Hepatitis B	10	122	0.1242793	4.031852e-01	ko05161	ENSOARG00000000873(PRKCG);ENSOARG00000002484(CREBBP);ENSOARG00000004058(IKBKG);ENSOARG00000007664(PIK3CD);ENSOARG00000009999(JUN);ENSOARG00000012718(NFKB1);ENSOARG00000013636(CDKN1A);ENSOARG00000014176(CCNA2);ENSOARG00000016922(CASP8);ENSOARG00000017943(EP300)	K19663+K04498+K07210+K00922+K04448+K02580+K06625+K06627+K04398+K04498
Organismal Systems	Sensory system	Taste transduction	9	108	0.1301629	4.174190e-01	ko04742	ENSOARG00000007096(PDE1C);ENSOARG00000016848(GABBR1);MSTRG.11986(--);MSTRG.12080(--);MSTRG.12235(--);MSTRG.17436(--);MSTRG.24555(--);MSTRG.28563(--);MSTRG.28719(--)	K13755+K04615+K08474+K08474+K08474+K08474+K08474+K08474+K08474
Human Diseases	Cancers	Choline metabolism in cancer	8	95	0.1419333	4.499931e-01	ko05231	ENSOARG00000000873(PRKCG);ENSOARG00000001700(PLCG1);ENSOARG00000002738(MTOR);ENSOARG00000006616(DGKE);ENSOARG00000007664(PIK3CD);ENSOARG00000009999(JUN);ENSOARG00000019293(DGKD);ENSOARG00000020627(SOS2)	K19663+K01116+K07203+K00901+K00922+K04448+K00901+K03099
Human Diseases	Cancers	Gastric cancer	13	173	0.1441832	4.519900e-01	ko05226	ENSOARG00000002738(MTOR);ENSOARG00000003199(SHC1);ENSOARG00000003455(CDH1);ENSOARG00000007664(PIK3CD);ENSOARG00000011356(GADD45A);ENSOARG00000013636(CDKN1A);ENSOARG00000016130(APC);ENSOARG00000020627(SOS2);MSTRG.13355(--);MSTRG.15195(--);MSTRG.15198(--);MSTRG.23431(--);MSTRG.2616(--)	K07203+K06279+K05689+K00922+K04402+K06625+K02085+K03099+K05691+K05691+K05691+K05691+K05691
Organismal Systems	Immune system	Th17 cell differentiation	8	96	0.148029	4.569336e-01	ko04659	ENSOARG00000001700(PLCG1);ENSOARG00000002738(MTOR);ENSOARG00000004058(IKBKG);ENSOARG00000007335(DYA);ENSOARG00000009999(JUN);ENSOARG00000012718(NFKB1);ENSOARG00000016012(TYK2);ENSOARG00000020866(IL1B)	K01116+K07203+K07210+K06752+K04448+K02580+K11219+K04519
Metabolism	Metabolism of other amino acids	Glutathione metabolism	5	52	0.1490357	4.569336e-01	ko00480	ENSOARG00000004237(G6PD);ENSOARG00000007070(GCLC);ENSOARG00000007965(GPX8);ENSOARG00000010451(-);ENSOARG00000015333(RRM2)	K00036+K11204+K00432+K00383+K10808
Organismal Systems	Immune system	B cell receptor signaling pathway	6	67	0.1536657	4.660079e-01	ko04662	ENSOARG00000004058(IKBKG);ENSOARG00000004356(CARD11);ENSOARG00000007664(PIK3CD);ENSOARG00000009999(JUN);ENSOARG00000012718(NFKB1);ENSOARG00000020627(SOS2)	K07210+K07367+K00922+K04448+K02580+K03099
Human Diseases	Infectious diseases	Legionellosis	5	53	0.1577584	4.704735e-01	ko05134	ENSOARG00000000483(NFKB2);ENSOARG00000005384(-);ENSOARG00000012718(NFKB1);ENSOARG00000016922(CASP8);ENSOARG00000020866(IL1B)	K04469+K03990+K02580+K04398+K04519
Metabolism	Amino acid metabolism	Glycine, serine and threonine metabolism	4	39	0.1585108	4.704735e-01	ko00260	ENSOARG00000007263(SDSL);ENSOARG00000007716(BPGM);ENSOARG00000013672(GLDC);ENSOARG00000020412(PHGDH)	K17989+K01837+K00281+K00058
Environmental Information Processing	Signal transduction	mTOR signaling pathway	10	130	0.1662627	4.882873e-01	ko04150	ENSOARG00000000285(INSR);ENSOARG00000000873(PRKCG);ENSOARG00000002034(FLCN);ENSOARG00000002738(MTOR);ENSOARG00000007664(PIK3CD);ENSOARG00000011159(CLIP1);ENSOARG00000013499(ULK1);ENSOARG00000016187(FNIP1);ENSOARG00000017770(ULK2);ENSOARG00000020627(SOS2)	K04527+K19663+K09594+K07203+K00922+K10421+K21357+K20400+K08269+K03099
Metabolism	Global and overview maps	Biosynthesis of amino acids	6	69	0.1692915	4.895544e-01	ko01230	ENSOARG00000000678(OTC);ENSOARG00000004229(PKLR);ENSOARG00000005506(ENO3);ENSOARG00000007263(SDSL);ENSOARG00000010176(MAT1A);ENSOARG00000020412(PHGDH)	K00611+K12406+K01689+K17989+K00789+K00058
Organismal Systems	Endocrine system	Relaxin signaling pathway	9	115	0.1702035	4.895544e-01	ko04926	ENSOARG00000003199(SHC1);ENSOARG00000004790(MMP13);ENSOARG00000007664(PIK3CD);ENSOARG00000008334(VEGFA);ENSOARG00000009999(JUN);ENSOARG00000012718(NFKB1);ENSOARG00000016476(COL3A1);ENSOARG00000020525(COL4A3);ENSOARG00000020627(SOS2)	K06279+K07994+K00922+K05448+K04448+K02580+K19720+K06237+K03099
Metabolism	Carbohydrate metabolism	Pentose phosphate pathway	3	27	0.1777728	4.925412e-01	ko00030	ENSOARG00000004237(G6PD);ENSOARG00000008650(FBP1);ENSOARG00000008668(FBP2)	K00036+K03841+K03841
Human Diseases	Immune diseases	Graft-versus-host disease	3	27	0.1777728	4.925412e-01	ko05332	ENSOARG00000007335(DYA);ENSOARG00000020866(IL1B);ENSOARG00000020877(IL1A)	K06752+K04519+K04383
Organismal Systems	Endocrine system	Ovarian Steroidogenesis	4	41	0.1799685	4.925412e-01	ko04913	ENSOARG00000000285(INSR);ENSOARG00000007592(PTGS2);ENSOARG00000009466(HSD17B2);ENSOARG00000017639(LDLR)	K04527+K11987+K13368+K12473
Human Diseases	Endocrine and metabolic diseases	Type II diabetes mellitus	4	41	0.1799685	4.925412e-01	ko04930	ENSOARG00000000285(INSR);ENSOARG00000002738(MTOR);ENSOARG00000004229(PKLR);ENSOARG00000007664(PIK3CD)	K04527+K07203+K12406+K00922
Human Diseases	Infectious diseases	Chagas disease (American trypanosomiasis)	8	101	0.1803433	4.925412e-01	ko05142	ENSOARG00000004058(IKBKG);ENSOARG00000005384(-);ENSOARG00000007664(PIK3CD);ENSOARG00000009999(JUN);ENSOARG00000012718(NFKB1);ENSOARG00000014624(PPP2R1B);ENSOARG00000016922(CASP8);ENSOARG00000020866(IL1B)	K07210+K03990+K00922+K04448+K02580+K03456+K04398+K04519
Cellular Processes	Cellular community - eukaryotes	Signaling pathways regulating pluripotency of stem cells	9	117	0.1825991	4.925412e-01	ko04550	ENSOARG00000001111(ID1);ENSOARG00000001576(FGFR1);ENSOARG00000006779(INHBE);ENSOARG00000007318(ID3);ENSOARG00000007360(DUSP9);ENSOARG00000007664(PIK3CD);ENSOARG00000008930(RIF1);ENSOARG00000016130(APC);ENSOARG00000017641(BMPR2)	K04680+K04362+K22689+K17694+K18498+K00922+K11138+K02085+K04671
Human Diseases	Cancers	Colorectal cancer	7	86	0.1835996	4.925412e-01	ko05210	ENSOARG00000002738(MTOR);ENSOARG00000007664(PIK3CD);ENSOARG00000009999(JUN);ENSOARG00000011356(GADD45A);ENSOARG00000013636(CDKN1A);ENSOARG00000016130(APC);ENSOARG00000020627(SOS2)	K07203+K00922+K04448+K04402+K06625+K02085+K03099
Genetic Information Processing	Translation	Ribosome biogenesis in eukaryotes	6	71	0.1855512	4.930360e-01	ko03008	ENSOARG00000003675(HEATR1);ENSOARG00000009424(NOL6);ENSOARG00000012528(MDN1);ENSOARG00000013401(REXO5);ENSOARG00000016018(NVL);ENSOARG00000017354(NXF1)	K14550+K14544+K14572+K14570+K14571+K14284
Human Diseases	Cancers	Hepatocellular carcinoma	11	150	0.1892805	4.982006e-01	ko05225	ENSOARG00000000873(PRKCG);ENSOARG00000001700(PLCG1);ENSOARG00000002738(MTOR);ENSOARG00000003199(SHC1);ENSOARG00000004275(ARID1A);ENSOARG00000007664(PIK3CD);ENSOARG00000011356(GADD45A);ENSOARG00000013636(CDKN1A);ENSOARG00000016130(APC);ENSOARG00000016814(TXNRD1);ENSOARG00000020627(SOS2)	K19663+K01116+K07203+K06279+K11653+K00922+K04402+K06625+K02085+K22182+K03099
Genetic Information Processing	Transcription	RNA polymerase	3	28	0.1916546	4.997349e-01	ko03020	ENSOARG00000009656(POLR3A);ENSOARG00000013874(-);ENSOARG00000020601(POLR1A)	K03018+K03006+K02999
Human Diseases	Cardiovascular diseases	Hypertrophic cardiomyopathy (HCM)	6	72	0.1939035	5.001170e-01	ko05410	ENSOARG00000008212(ITGA2);ENSOARG00000008370(GPATCH8);ENSOARG00000016181(ITGA5);ENSOARG00000019143(CACNB3);ENSOARG00000020185(DES);ENSOARG00000020629(ITGA10)	K06481+K06476+K06484+K04864+K07610+K06586
Environmental Information Processing	Signal transduction	Wnt signaling pathway	9	119	0.1953862	5.001170e-01	ko04310	ENSOARG00000000072(FOSL1);ENSOARG00000000873(PRKCG);ENSOARG00000002484(CREBBP);ENSOARG00000009999(JUN);ENSOARG00000010801(PRICKLE3);ENSOARG00000015180(BAMBI);ENSOARG00000016130(APC);ENSOARG00000017943(EP300);ENSOARG00000019643(CHD8)	K04502+K19663+K04498+K04448+K04511+K10162+K02085+K04498+K04494
Metabolism	Amino acid metabolism	Valine, leucine and isoleucine biosynthesis	1	4	0.1997904	5.021759e-01	ko00290	ENSOARG00000007263(SDSL)	K17989
Metabolism	Metabolism of other amino acids	D-Glutamine and D-glutamate metabolism	1	4	0.1997904	5.021759e-01	ko00471	MSTRG.2726(GLUD1)	K00261
Cellular Processes	Cell growth and death	Necroptosis	10	136	0.2016931	5.024319e-01	ko04217	ENSOARG00000000569(TNFAIP3);ENSOARG00000002683(SQSTM1);ENSOARG00000006356(BIRC3);ENSOARG00000006491(BIRC2);ENSOARG00000007591(NLRP3);ENSOARG00000016012(TYK2);ENSOARG00000016922(CASP8);ENSOARG00000020866(IL1B);ENSOARG00000020877(IL1A);MSTRG.2726(GLUD1)	K11859+K14381+K16060+K16060+K12800+K11219+K04398+K04519+K04383+K00261
Human Diseases	Immune diseases	Inflammatiory bowel disease (IBD)	5	58	0.2042445	5.042851e-01	ko05321	ENSOARG00000007335(DYA);ENSOARG00000009999(JUN);ENSOARG00000012718(NFKB1);ENSOARG00000020866(IL1B);ENSOARG00000020877(IL1A)	K06752+K04448+K02580+K04519+K04383
Human Diseases	Endocrine and metabolic diseases	Non-alcoholic fatty liver disease (NAFLD)	10	137	0.2078947	5.087949e-01	ko04932	ENSOARG00000000285(INSR);ENSOARG00000004229(PKLR);ENSOARG00000007664(PIK3CD);ENSOARG00000009999(JUN);ENSOARG00000012001(MLXIP);ENSOARG00000012718(NFKB1);ENSOARG00000016922(CASP8);ENSOARG00000020774(EIF2AK3);ENSOARG00000020866(IL1B);ENSOARG00000020877(IL1A)	K04527+K12406+K00922+K04448+K09113+K02580+K04398+K08860+K04519+K04383
Human Diseases	Cardiovascular diseases	Dilated cardiomyopathy (DCM)	6	74	0.2110211	5.119555e-01	ko05414	ENSOARG00000008212(ITGA2);ENSOARG00000008370(GPATCH8);ENSOARG00000016181(ITGA5);ENSOARG00000019143(CACNB3);ENSOARG00000020185(DES);ENSOARG00000020629(ITGA10)	K06481+K06476+K06484+K04864+K07610+K06586
Metabolism	Metabolism of other amino acids	beta-Alanine metabolism	3	30	0.2201682	5.205672e-01	ko00410	ENSOARG00000000307(SMOX);ENSOARG00000014074(UPB1);ENSOARG00000020569(EHHADH)	K12259+K01431+K07514
Cellular Processes	Transport and catabolism	Autophagy - other eukaryotes	3	30	0.2201682	5.205672e-01	ko04136	ENSOARG00000002738(MTOR);ENSOARG00000016088(ATG2B);ENSOARG00000017770(ULK2)	K07203+K17906+K08269
Cellular Processes	Cell growth and death	Apoptosis - multiple species	3	30	0.2201682	5.205672e-01	ko04215	ENSOARG00000006356(BIRC3);ENSOARG00000006491(BIRC2);ENSOARG00000016922(CASP8)	K16060+K16060+K04398
Human Diseases	Cancers	Central carbon metabolism in cancer	5	61	0.2340869	5.446868e-01	ko05230	ENSOARG00000001576(FGFR1);ENSOARG00000002738(MTOR);ENSOARG00000004237(G6PD);ENSOARG00000007664(PIK3CD);ENSOARG00000020471(SLC2A1)	K04362+K07203+K00036+K00922+K07299
Metabolism	Metabolism of cofactors and vitamins	Pantothenate and CoA biosynthesis	2	17	0.2342739	5.446868e-01	ko00770	ENSOARG00000002726(PPCDC);ENSOARG00000014074(UPB1)	K01598+K01431
Metabolism	Lipid metabolism	Steroid hormone biosynthesis	4	46	0.2372655	5.452968e-01	ko00140	ENSOARG00000009466(HSD17B2);ENSOARG00000009541(-);ENSOARG00000010025(-);ENSOARG00000010045(AKR1D1)	K13368+K00699+K01016+K00251
Human Diseases	Infectious diseases	Amoebiasis	7	93	0.2384452	5.452968e-01	ko05146	ENSOARG00000000873(PRKCG);ENSOARG00000003418(PTK2);ENSOARG00000007664(PIK3CD);ENSOARG00000012718(NFKB1);ENSOARG00000016476(COL3A1);ENSOARG00000020525(COL4A3);ENSOARG00000020866(IL1B)	K19663+K05725+K00922+K02580+K19720+K06237+K04519
Metabolism	Amino acid metabolism	Arginine biosynthesis	2	18	0.2547667	5.650139e-01	ko00220	ENSOARG00000000678(OTC);MSTRG.2726(GLUD1)	K00611+K00261
Human Diseases	Endocrine and metabolic diseases	Maturity onset diabetes of the young	2	18	0.2547667	5.650139e-01	ko04950	ENSOARG00000004229(PKLR);ENSOARG00000020422(HES1)	K12406+K06054
Organismal Systems	Endocrine system	Parathyroid hormone synthesis, secretion and action	7	95	0.2550236	5.650139e-01	ko04928	ENSOARG00000000873(PRKCG);ENSOARG00000001576(FGFR1);ENSOARG00000004790(MMP13);ENSOARG00000006679(ARHGEF11);ENSOARG00000013636(CDKN1A);ENSOARG00000015114(CYP24A1);ENSOARG00000016470(EGR1)	K19663+K04362+K07994+K12331+K06625+K07436+K09203
Organismal Systems	Aging	Longevity regulating pathway - mammal	6	79	0.2559103	5.650139e-01	ko04211	ENSOARG00000000285(INSR);ENSOARG00000002738(MTOR);ENSOARG00000007664(PIK3CD);ENSOARG00000009085(SESN3);ENSOARG00000012718(NFKB1);ENSOARG00000013499(ULK1)	K04527+K07203+K00922+K10141+K02580+K21357
Environmental Information Processing	Signal transduction	Phospholipase D signaling pathway	9	128	0.2571927	5.650139e-01	ko04072	ENSOARG00000000285(INSR);ENSOARG00000001700(PLCG1);ENSOARG00000002738(MTOR);ENSOARG00000003199(SHC1);ENSOARG00000006616(DGKE);ENSOARG00000007137(RRAS2);ENSOARG00000007664(PIK3CD);ENSOARG00000019293(DGKD);ENSOARG00000020627(SOS2)	K04527+K01116+K07203+K06279+K00901+K07830+K00922+K00901+K03099
Organismal Systems	Excretory system	Aldosterone-regulated sodium reabsorption	3	33	0.2643282	5.732708e-01	ko04960	ENSOARG00000000285(INSR);ENSOARG00000000873(PRKCG);ENSOARG00000007664(PIK3CD)	K04527+K19663+K00922
Human Diseases	Cancers	Acute myeloid leukemia	5	64	0.2650607	5.732708e-01	ko05221	ENSOARG00000002738(MTOR);ENSOARG00000004058(IKBKG);ENSOARG00000007664(PIK3CD);ENSOARG00000012718(NFKB1);ENSOARG00000020627(SOS2)	K07203+K07210+K00922+K02580+K03099
Cellular Processes	Cell growth and death	Ferroptosis	4	49	0.273485	5.772126e-01	ko04216	ENSOARG00000005049(CP);ENSOARG00000007070(GCLC);ENSOARG00000012368(STEAP3);ENSOARG00000016390(SLC40A1)	K13624+K11204+K10142+K14685
Genetic Information Processing	Translation	RNA transport	10	147	0.2738618	5.772126e-01	ko03013	ENSOARG00000002200(NUP98);ENSOARG00000008616(PNN);ENSOARG00000008977(NUP188);ENSOARG00000010739(UPF1);ENSOARG00000011514(NUP153);ENSOARG00000013057(-);ENSOARG00000013239(CASC3);ENSOARG00000015785(CYFIP1);ENSOARG00000017354(NXF1);ENSOARG00000019368(ACIN1)	K14297+K13114+K14311+K14326+K14296+K14316+K14323+K05749+K14284+K12875
Metabolism	Lipid metabolism	Steroid biosynthesis	2	19	0.2752926	5.772126e-01	ko00100	ENSOARG00000015114(CYP24A1);ENSOARG00000016688(SOAT2)	K07436+K00637
Human Diseases	Cancers	Melanoma	5	65	0.2755891	5.772126e-01	ko05218	ENSOARG00000001576(FGFR1);ENSOARG00000003455(CDH1);ENSOARG00000007664(PIK3CD);ENSOARG00000011356(GADD45A);ENSOARG00000013636(CDKN1A)	K04362+K05689+K00922+K04402+K06625
Cellular Processes	Transport and catabolism	Phagosome	9	131	0.279095	5.772126e-01	ko04145	ENSOARG00000005384(-);ENSOARG00000007335(DYA);ENSOARG00000008212(ITGA2);ENSOARG00000010165(-);ENSOARG00000013739(TUBA8);ENSOARG00000016181(ITGA5);ENSOARG00000018265(HGS);ENSOARG00000019028(PIKFYVE);ENSOARG00000020058(THBS1)	K03990+K06752+K06481+K03991+K07374+K06484+K12182+K00921+K16857
Human Diseases	Neurodegenerative diseases	Prion diseases	3	34	0.2792964	5.772126e-01	ko05020	ENSOARG00000016470(EGR1);ENSOARG00000020866(IL1B);ENSOARG00000020877(IL1A)	K09203+K04519+K04383
Genetic Information Processing	Folding, sorting and degradation	Sulfur relay system	1	6	0.2842141	5.786268e-01	ko04122	ENSOARG00000019145(TST)	K01011
Environmental Information Processing	Membrane transport	ABC transporters	4	50	0.2857675	5.786268e-01	ko02010	ENSOARG00000001030(ABCD4);ENSOARG00000003559(ABCC3);ENSOARG00000010639(ABCA7);ENSOARG00000020631(ABCC5)	K05678+K05667+K05645+K05668
Metabolism	Xenobiotics biodegradation and metabolism	Drug metabolism - other enzymes	5	66	0.2862025	5.786268e-01	ko00983	ENSOARG00000005673(TK1);ENSOARG00000009541(-);ENSOARG00000014074(UPB1);ENSOARG00000015333(RRM2);ENSOARG00000016081(-)	K00857+K00699+K01431+K10808+K00757
Human Diseases	Endocrine and metabolic diseases	Type I diabetes mellitus	3	35	0.2943413	5.878947e-01	ko04940	ENSOARG00000007335(DYA);ENSOARG00000020866(IL1B);ENSOARG00000020877(IL1A)	K06752+K04519+K04383
Metabolism	Nucleotide metabolism	Purine metabolism	11	167	0.2950009	5.878947e-01	ko00230	ENSOARG00000004229(PKLR);ENSOARG00000007096(PDE1C);ENSOARG00000008185(-);ENSOARG00000009656(POLR3A);ENSOARG00000011762(NPR2);ENSOARG00000013874(-);ENSOARG00000015333(RRM2);ENSOARG00000019266(AMPD2);ENSOARG00000020601(POLR1A);ENSOARG00000020607(POLE2);ENSOARG00000020763(GUCY2C)	K12406+K13755+K02684+K03018+K12324+K03006+K10808+K01490+K02999+K02325+K12320
Human Diseases	Cancers	Basal cell carcinoma	4	51	0.2981285	5.899138e-01	ko05217	ENSOARG00000011356(GADD45A);ENSOARG00000011676(KIF7);ENSOARG00000013636(CDKN1A);ENSOARG00000016130(APC)	K04402+K18806+K06625+K02085
Cellular Processes	Transport and catabolism	Autophagy - animal	8	117	0.3002681	5.899634e-01	ko04140	ENSOARG00000002738(MTOR);ENSOARG00000007137(RRAS2);ENSOARG00000007664(PIK3CD);ENSOARG00000008706(DAPK1);ENSOARG00000013499(ULK1);ENSOARG00000016088(ATG2B);ENSOARG00000017770(ULK2);ENSOARG00000020774(EIF2AK3)	K07203+K07830+K00922+K08803+K21357+K17906+K08269+K08860
Human Diseases	Cancers	Thyroid cancer	3	36	0.309436	6.037248e-01	ko05216	ENSOARG00000003455(CDH1);ENSOARG00000011356(GADD45A);ENSOARG00000013636(CDKN1A)	K05689+K04402+K06625
Metabolism	Carbohydrate metabolism	Pentose and glucuronate interconversions	2	21	0.3161962	6.126301e-01	ko00040	ENSOARG00000009541(-);ENSOARG00000013937(CRYL1)	K00699+K13247
Environmental Information Processing	Signal transduction	Ras signaling pathway	13	205	0.3186414	6.131100e-01	ko04014	ENSOARG00000000285(INSR);ENSOARG00000000873(PRKCG);ENSOARG00000001576(FGFR1);ENSOARG00000001700(PLCG1);ENSOARG00000003199(SHC1);ENSOARG00000004058(IKBKG);ENSOARG00000006643(RASA2);ENSOARG00000007137(RRAS2);ENSOARG00000007419(ABL1);ENSOARG00000007664(PIK3CD);ENSOARG00000008334(VEGFA);ENSOARG00000012718(NFKB1);ENSOARG00000020627(SOS2)	K04527+K19663+K04362+K01116+K06279+K07210+K08053+K07830+K06619+K00922+K05448+K02580+K03099
Human Diseases	Drug resistance	Platinum drug resistance	5	70	0.3293079	6.292939e-01	ko01524	ENSOARG00000006356(BIRC3);ENSOARG00000006491(BIRC2);ENSOARG00000007664(PIK3CD);ENSOARG00000013636(CDKN1A);ENSOARG00000016922(CASP8)	K16060+K16060+K00922+K06625+K04398
Genetic Information Processing	Replication and repair	Mismatch repair	2	22	0.3364664	6.342846e-01	ko03430	ENSOARG00000010697(RFC3);ENSOARG00000011737(RFC2)	K10756+K10755
Organismal Systems	Excretory system	Proximal tubule bicarbonate reclamation	2	22	0.3364664	6.342846e-01	ko04964	ENSOARG00000010284(SLC38A3);MSTRG.2726(GLUD1)	K13576+K00261
Organismal Systems	Endocrine system	Prolactin signaling pathway	5	71	0.3401985	6.359481e-01	ko04917	ENSOARG00000003199(SHC1);ENSOARG00000007664(PIK3CD);ENSOARG00000012718(NFKB1);ENSOARG00000015078(IRF1);ENSOARG00000020627(SOS2)	K06279+K00922+K02580+K09444+K03099
Organismal Systems	Immune system	Hematopoietic cell lineage	6	88	0.3419076	6.359481e-01	ko04640	ENSOARG00000007335(DYA);ENSOARG00000008212(ITGA2);ENSOARG00000008370(GPATCH8);ENSOARG00000016181(ITGA5);ENSOARG00000020866(IL1B);ENSOARG00000020877(IL1A)	K06752+K06481+K06476+K06484+K04519+K04383
Human Diseases	Infectious diseases	Tuberculosis	10	157	0.3451979	6.378160e-01	ko05152	ENSOARG00000002484(CREBBP);ENSOARG00000004971(IRAK2);ENSOARG00000005384(-);ENSOARG00000007335(DYA);ENSOARG00000009130(ITGAX);ENSOARG00000012718(NFKB1);ENSOARG00000016922(CASP8);ENSOARG00000017943(EP300);ENSOARG00000020866(IL1B);ENSOARG00000020877(IL1A)	K04498+K04731+K03990+K06752+K06462+K02580+K04398+K04498+K04519+K04383
Organismal Systems	Development	Axon guidance	10	158	0.3525212	6.470619e-01	ko04360	ENSOARG00000001700(PLCG1);ENSOARG00000003418(PTK2);ENSOARG00000005994(TRPC1);ENSOARG00000007419(ABL1);ENSOARG00000007664(PIK3CD);ENSOARG00000007771(SEMA4D);ENSOARG00000012066(SEMA4B);ENSOARG00000013713(SEMA4C);ENSOARG00000013781(PARD6B);ENSOARG00000017641(BMPR2)	K01116+K05725+K04964+K06619+K00922+K06521+K06521+K06521+K06093+K04671
Human Diseases	Endocrine and metabolic diseases	Cushing syndrome	8	124	0.3577702	6.517605e-01	ko04934	ENSOARG00000004421(CDKN2C);ENSOARG00000009830(-);ENSOARG00000013636(CDKN1A);ENSOARG00000016130(APC);ENSOARG00000017214(NR4A1);ENSOARG00000017639(LDLR);ENSOARG00000018975(KMT2D);MSTRG.17862(Cacna1h)	K06622+K09186+K06625+K02085+K04465+K12473+K09187+K04855
Metabolism	Energy metabolism	Sulfur metabolism	1	8	0.3597531	6.517605e-01	ko00920	ENSOARG00000019145(TST)	K01011
Metabolism	Lipid metabolism	Glycerolipid metabolism	4	57	0.3731235	6.716223e-01	ko00561	ENSOARG00000001430(PLPP5);ENSOARG00000006616(DGKE);ENSOARG00000012189(DGAT2);ENSOARG00000019293(DGKD)	K18693+K00901+K11160+K00901
Cellular Processes	Transport and catabolism	Peroxisome	8	130	0.4079611	7.296227e-01	ko04146	ENSOARG00000001030(ABCD4);ENSOARG00000004154(PEX5);ENSOARG00000020569(EHHADH);MSTRG.10226(--);MSTRG.19768(--);MSTRG.21766(--);MSTRG.3127(--);MSTRG.8377(--)	K05678+K13342+K07514+K00308+K00308+K00308+K00308+K00308
Organismal Systems	Endocrine system	Glucagon signaling pathway	6	95	0.4107067	7.298546e-01	ko04922	ENSOARG00000001610(-);ENSOARG00000002484(CREBBP);ENSOARG00000005886(PFKFB1);ENSOARG00000012463(GYS1);ENSOARG00000017943(EP300);ENSOARG00000020471(SLC2A1)	K16333+K04498+K19028+K00693+K04498+K07299
Organismal Systems	Digestive system	Cholesterol metabolism	3	44	0.4292097	7.579083e-01	ko04979	ENSOARG00000016688(SOAT2);ENSOARG00000017402(APOB);ENSOARG00000017639(LDLR)	K00637+K14462+K12473
Metabolism	Lipid metabolism	Fatty acid elongation	2	27	0.4343526	7.621659e-01	ko00062	ENSOARG00000000588(ACOT4);ENSOARG00000012786(ABHD17B)	K01068+K01076
Organismal Systems	Immune system	Leukocyte transendothelial migration	9	152	0.4415473	7.690065e-01	ko04670	ENSOARG00000000873(PRKCG);ENSOARG00000001700(PLCG1);ENSOARG00000003418(PTK2);ENSOARG00000007664(PIK3CD);MSTRG.13355(--);MSTRG.15195(--);MSTRG.15198(--);MSTRG.23431(--);MSTRG.2616(--)	K19663+K01116+K05725+K00922+K05691+K05691+K05691+K05691+K05691
Organismal Systems	Endocrine system	Regulation of lipolysis in adipocyte	3	45	0.4437636	7.690065e-01	ko04923	ENSOARG00000000285(INSR);ENSOARG00000007592(PTGS2);ENSOARG00000007664(PIK3CD)	K04527+K11987+K00922
Human Diseases	Immune diseases	Rheumatoid arthritis	5	81	0.4491574	7.701908e-01	ko05323	ENSOARG00000007335(DYA);ENSOARG00000008334(VEGFA);ENSOARG00000009999(JUN);ENSOARG00000020866(IL1B);ENSOARG00000020877(IL1A)	K06752+K05448+K04448+K04519+K04383
Environmental Information Processing	Signal transduction	Apelin signaling pathway	7	117	0.4499681	7.701908e-01	ko04371	ENSOARG00000002590(SPP1);ENSOARG00000002738(MTOR);ENSOARG00000003455(CDH1);ENSOARG00000007137(RRAS2);ENSOARG00000010523(JAG1);ENSOARG00000014240(CCN2);ENSOARG00000016470(EGR1)	K06250+K07203+K05689+K07830+K06052+K06827+K09203
Organismal Systems	Immune system	Fc epsilon RI signaling pathway	4	65	0.4717294	7.988145e-01	ko04664	ENSOARG00000001700(PLCG1);ENSOARG00000007664(PIK3CD);ENSOARG00000013869(MAP2K6);ENSOARG00000020627(SOS2)	K01116+K00922+K04433+K03099
Human Diseases	Cardiovascular diseases	Viral myocarditis	3	47	0.4724172	7.988145e-01	ko05416	ENSOARG00000007335(DYA);ENSOARG00000007419(ABL1);ENSOARG00000016922(CASP8)	K06752+K06619+K04398
Genetic Information Processing	Replication and repair	Non-homologous end-joining	1	12	0.4878099	8.125461e-01	ko03450	ENSOARG00000007601(DCLRE1C)	K10887
Metabolism	Metabolism of cofactors and vitamins	Porphyrin and chlorophyll metabolism	2	30	0.4892751	8.125461e-01	ko00860	ENSOARG00000005049(CP);ENSOARG00000009541(-)	K13624+K00699
Human Diseases	Immune diseases	Primary immunodeficiency	2	30	0.4892751	8.125461e-01	ko05340	ENSOARG00000004058(IKBKG);ENSOARG00000007601(DCLRE1C)	K07210+K10887
Genetic Information Processing	Replication and repair	Base excision repair	2	31	0.5068296	8.267583e-01	ko03410	ENSOARG00000006852(NEIL3);ENSOARG00000020607(POLE2)	K10569+K02325
Human Diseases	Infectious diseases	African trypanosomiasis	2	31	0.5068296	8.267583e-01	ko05143	ENSOARG00000000873(PRKCG);ENSOARG00000020866(IL1B)	K19663+K04519
Organismal Systems	Endocrine system	Adipocytokine signaling pathway	4	68	0.5073043	8.267583e-01	ko04920	ENSOARG00000002738(MTOR);ENSOARG00000004058(IKBKG);ENSOARG00000012718(NFKB1);ENSOARG00000020471(SLC2A1)	K07203+K07210+K02580+K07299
Metabolism	Metabolism of cofactors and vitamins	Retinol metabolism	3	50	0.5140825	8.267583e-01	ko00830	ENSOARG00000005790(RDH10);ENSOARG00000009541(-);ENSOARG00000014744(DHRS3)	K11151+K00699+K11146
Environmental Information Processing	Signal transduction	Jak-STAT signaling pathway	8	143	0.5155074	8.267583e-01	ko04630	ENSOARG00000002484(CREBBP);ENSOARG00000002738(MTOR);ENSOARG00000007664(PIK3CD);ENSOARG00000009845(OSMR);ENSOARG00000013636(CDKN1A);ENSOARG00000016012(TYK2);ENSOARG00000017943(EP300);ENSOARG00000020627(SOS2)	K04498+K07203+K00922+K05057+K06625+K11219+K04498+K03099
Metabolism	Glycan biosynthesis and metabolism	Glycosphingolipid biosynthesis - globo and isoglobo series	1	13	0.5156127	8.267583e-01	ko00603	MSTRG.14787(--)	K20736
Organismal Systems	Endocrine system	Cortisol synthesis and secretion	3	52	0.540867	8.588354e-01	ko04927	ENSOARG00000017214(NR4A1);ENSOARG00000017639(LDLR);MSTRG.17862(Cacna1h)	K04465+K12473+K04855
Cellular Processes	Cellular community - eukaryotes	Gap junction	4	71	0.5417743	8.588354e-01	ko04540	ENSOARG00000000873(PRKCG);ENSOARG00000004318(CDK1);ENSOARG00000013739(TUBA8);ENSOARG00000020627(SOS2)	K19663+K02087+K07374+K03099
Organismal Systems	Digestive system	Bile secretion	4	72	0.5529895	8.716614e-01	ko04976	ENSOARG00000003559(ABCC3);ENSOARG00000016724(HMGCR);ENSOARG00000017639(LDLR);ENSOARG00000020471(SLC2A1)	K05667+K00021+K12473+K07299
Organismal Systems	Aging	Longevity regulating pathway - multiple species	3	54	0.5667848	8.814197e-01	ko04213	ENSOARG00000000285(INSR);ENSOARG00000002738(MTOR);ENSOARG00000007664(PIK3CD)	K04527+K07203+K00922
Organismal Systems	Endocrine system	Oxytocin signaling pathway	7	131	0.5708858	8.814197e-01	ko04921	ENSOARG00000000873(PRKCG);ENSOARG00000007592(PTGS2);ENSOARG00000009999(JUN);ENSOARG00000011762(NPR2);ENSOARG00000012673(RCAN1);ENSOARG00000013636(CDKN1A);ENSOARG00000019143(CACNB3)	K19663+K11987+K04448+K12324+K17901+K06625+K04864
Organismal Systems	Immune system	Natural killer cell mediated cytotoxicity	5	93	0.5726429	8.814197e-01	ko04650	ENSOARG00000000873(PRKCG);ENSOARG00000001700(PLCG1);ENSOARG00000003199(SHC1);ENSOARG00000007664(PIK3CD);ENSOARG00000020627(SOS2)	K19663+K01116+K06279+K00922+K03099
Organismal Systems	Sensory system	Inflammatory mediator regulation of TRP channels	5	93	0.5726429	8.814197e-01	ko04750	ENSOARG00000000873(PRKCG);ENSOARG00000001700(PLCG1);ENSOARG00000007664(PIK3CD);ENSOARG00000013869(MAP2K6);ENSOARG00000020866(IL1B)	K19663+K01116+K00922+K04433+K04519
Genetic Information Processing	Folding, sorting and degradation	RNA degradation	4	74	0.5749763	8.814197e-01	ko03018	ENSOARG00000003220(EDC4);ENSOARG00000005506(ENO3);ENSOARG00000009379(PAN2);ENSOARG00000012298(PAN3)	K12616+K01689+K12571+K12572
Organismal Systems	Immune system	Platelet activation	6	113	0.5802567	8.846537e-01	ko04611	ENSOARG00000000291(FGB);ENSOARG00000007664(PIK3CD);ENSOARG00000008212(ITGA2);ENSOARG00000008370(GPATCH8);ENSOARG00000016476(COL3A1);ENSOARG00000016733(FGA)	K03904+K00922+K06481+K06476+K19720+K03903
Metabolism	Lipid metabolism	Primary bile acid biosynthesis	1	16	0.5903106	8.897300e-01	ko00120	ENSOARG00000010045(AKR1D1)	K00251
Metabolism	Metabolism of other amino acids	Selenocompound metabolism	1	16	0.5903106	8.897300e-01	ko00450	ENSOARG00000016814(TXNRD1)	K22182
Organismal Systems	Immune system	Fc gamma R-mediated phagocytosis	4	76	0.5963423	8.897300e-01	ko04666	ENSOARG00000000873(PRKCG);ENSOARG00000001700(PLCG1);ENSOARG00000007664(PIK3CD);ENSOARG00000012972(MYO10)	K19663+K01116+K00922+K12559
Organismal Systems	Nervous system	GABAergic synapse	4	76	0.5963423	8.897300e-01	ko04727	ENSOARG00000000873(PRKCG);ENSOARG00000010284(SLC38A3);ENSOARG00000016848(GABBR1);ENSOARG00000019480(SLC38A2)	K19663+K13576+K04615+K14207
Genetic Information Processing	Replication and repair	Homologous recombination	2	37	0.6035902	8.957535e-01	ko03440	ENSOARG00000000099(TOP3A);ENSOARG00000012465(RAD52)	K03165+K10873
Organismal Systems	Immune system	RIG-I-like receptor signaling pathway	3	58	0.6158444	9.091036e-01	ko04622	ENSOARG00000004058(IKBKG);ENSOARG00000012718(NFKB1);ENSOARG00000016922(CASP8)	K07210+K02580+K04398
Organismal Systems	Nervous system	Long-term potentiation	3	59	0.6275087	9.159436e-01	ko04720	ENSOARG00000000873(PRKCG);ENSOARG00000002484(CREBBP);ENSOARG00000017943(EP300)	K19663+K04498+K04498
Organismal Systems	Digestive system	Fat digestion and absorption	2	39	0.6324943	9.159436e-01	ko04975	ENSOARG00000012189(DGAT2);ENSOARG00000017402(APOB)	K11160+K14462
Metabolism	Carbohydrate metabolism	Ascorbate and aldarate metabolism	1	18	0.6336097	9.159436e-01	ko00053	ENSOARG00000009541(-)	K00699
Metabolism	Energy metabolism	Nitrogen metabolism	1	18	0.6336097	9.159436e-01	ko00910	MSTRG.2726(GLUD1)	K00261
Organismal Systems	Endocrine system	Aldosterone synthesis and secretion	4	81	0.6468647	9.302603e-01	ko04925	ENSOARG00000000873(PRKCG);ENSOARG00000017214(NR4A1);ENSOARG00000017639(LDLR);MSTRG.17862(Cacna1h)	K19663+K04465+K12473+K04855
Metabolism	Metabolism of terpenoids and polyketides	Terpenoid backbone biosynthesis	1	19	0.6535162	9.302603e-01	ko00900	ENSOARG00000016724(HMGCR)	K00021
Organismal Systems	Digestive system	Vitamin digestion and absorption	1	19	0.6535162	9.302603e-01	ko04977	ENSOARG00000017402(APOB)	K14462
Human Diseases	Substance dependence	Cocaine addiction	2	42	0.6727301	9.527497e-01	ko05030	ENSOARG00000009999(JUN);ENSOARG00000012718(NFKB1)	K04448+K02580
Organismal Systems	Endocrine system	GnRH signaling pathway	4	86	0.6930412	9.730426e-01	ko04912	ENSOARG00000009999(JUN);ENSOARG00000013869(MAP2K6);ENSOARG00000016470(EGR1);ENSOARG00000020627(SOS2)	K04448+K04433+K09203+K03099
Organismal Systems	Digestive system	Mineral absorption	2	44	0.6975216	9.730426e-01	ko04978	ENSOARG00000011928(STEAP2);ENSOARG00000016390(SLC40A1)	K14738+K14685
Human Diseases	Infectious diseases	Malaria	2	44	0.6975216	9.730426e-01	ko05144	ENSOARG00000020058(THBS1);ENSOARG00000020866(IL1B)	K16857+K04519
Organismal Systems	Endocrine system	Thyroid hormone synthesis	3	66	0.7022435	9.747559e-01	ko04918	ENSOARG00000000873(PRKCG);ENSOARG00000007965(GPX8);ENSOARG00000010451(-)	K19663+K00432+K00383
Metabolism	Lipid metabolism	Biosynthesis of unsaturated fatty acids	1	22	0.7069935	9.764910e-01	ko01040	ENSOARG00000000588(ACOT4)	K01068
Organismal Systems	Digestive system	Protein digestion and absorption	5	109	0.7116642	9.772999e-01	ko04974	ENSOARG00000006078(COL27A1);ENSOARG00000012584(COL18A1);ENSOARG00000016476(COL3A1);ENSOARG00000019480(SLC38A2);ENSOARG00000020525(COL4A3)	K19721+K06823+K19720+K14207+K06237
Environmental Information Processing	Signaling molecules and interaction	Cell adhesion molecules (CAMs)	6	130	0.7145849	9.772999e-01	ko04514	ENSOARG00000000454(PTPRF);ENSOARG00000003455(CDH1);ENSOARG00000007335(DYA);ENSOARG00000016602(NLGN3);MSTRG.1806(--);MSTRG.21920(--)	K05695+K05689+K06752+K07378+K06797+K06797
Organismal Systems	Nervous system	Glutamatergic synapse	4	89	0.7186108	9.780118e-01	ko04724	ENSOARG00000000873(PRKCG);ENSOARG00000005994(TRPC1);ENSOARG00000010284(SLC38A3);ENSOARG00000019480(SLC38A2)	K19663+K04964+K13576+K14207
Metabolism	Amino acid metabolism	Valine, leucine and isoleucine degradation	2	47	0.731777	9.815663e-01	ko00280	ENSOARG00000005258(MCCC2);ENSOARG00000020569(EHHADH)	K01969+K07514
Metabolism	Carbohydrate metabolism	Amino sugar and nucleotide sugar metabolism	2	47	0.731777	9.815663e-01	ko00520	ENSOARG00000002773(GMDS);ENSOARG00000010765(UAP1)	K01711+K00972
Genetic Information Processing	Replication and repair	Fanconi anemia pathway	2	47	0.731777	9.815663e-01	ko03460	ENSOARG00000000099(TOP3A);ENSOARG00000020422(HES1)	K03165+K06054
Environmental Information Processing	Signal transduction	Sphingolipid signaling pathway	5	114	0.7479166	9.946633e-01	ko04071	ENSOARG00000000873(PRKCG);ENSOARG00000006286(SGPL1);ENSOARG00000007664(PIK3CD);ENSOARG00000012718(NFKB1);ENSOARG00000014624(PPP2R1B)	K19663+K01634+K00922+K02580+K03456
Environmental Information Processing	Signal transduction	Calcium signaling pathway	7	156	0.74926	9.946633e-01	ko04020	ENSOARG00000000873(PRKCG);ENSOARG00000001700(PLCG1);ENSOARG00000007096(PDE1C);ENSOARG00000009749(PLCD3);ENSOARG00000010448(ERBB3);ENSOARG00000016226(ATP2A2);MSTRG.17862(Cacna1h)	K19663+K01116+K13755+K05857+K05084+K05853+K04855
Human Diseases	Immune diseases	Asthma	1	25	0.7522364	9.946633e-01	ko05310	ENSOARG00000007335(DYA)	K06752
Metabolism	Carbohydrate metabolism	Butanoate metabolism	1	26	0.765712	1.000000e+00	ko00650	ENSOARG00000020569(EHHADH)	K07514
Environmental Information Processing	Signal transduction	Hippo signaling pathway - multiple species	1	26	0.765712	1.000000e+00	ko04392	ENSOARG00000020699(FRMD6)	K16822
Environmental Information Processing	Signal transduction	cAMP signaling pathway	8	183	0.7833099	1.000000e+00	ko04024	ENSOARG00000001160(ARAP3);ENSOARG00000002484(CREBBP);ENSOARG00000007137(RRAS2);ENSOARG00000007664(PIK3CD);ENSOARG00000009999(JUN);ENSOARG00000012718(NFKB1);ENSOARG00000016848(GABBR1);ENSOARG00000017943(EP300)	K12490+K04498+K07830+K00922+K04448+K02580+K04615+K04498
Metabolism	Amino acid metabolism	Tyrosine metabolism	1	28	0.7905097	1.000000e+00	ko00350	ENSOARG00000019925(HGD)	K00451
Organismal Systems	Nervous system	Long-term depression	2	55	0.8073566	1.000000e+00	ko04730	ENSOARG00000000873(PRKCG);ENSOARG00000014624(PPP2R1B)	K19663+K03456
Organismal Systems	Environmental adaptation	Circadian entrainment	3	79	0.8098834	1.000000e+00	ko04713	ENSOARG00000000873(PRKCG);ENSOARG00000018911(-);MSTRG.17862(Cacna1h)	K19663+K21944+K04855
Organismal Systems	Endocrine system	Estrogen signaling pathway	5	124	0.8100965	1.000000e+00	ko04915	ENSOARG00000003199(SHC1);ENSOARG00000007664(PIK3CD);ENSOARG00000009999(JUN);ENSOARG00000016848(GABBR1);ENSOARG00000020627(SOS2)	K06279+K00922+K04448+K04615+K03099
Metabolism	Carbohydrate metabolism	Galactose metabolism	1	30	0.8126893	1.000000e+00	ko00052	ENSOARG00000008843(GALM)	K01785
Metabolism	Carbohydrate metabolism	Glyoxylate and dicarboxylate metabolism	1	30	0.8126893	1.000000e+00	ko00630	ENSOARG00000013672(GLDC)	K00281
Metabolism	Carbohydrate metabolism	Propanoate metabolism	1	30	0.8126893	1.000000e+00	ko00640	ENSOARG00000020569(EHHADH)	K07514
Organismal Systems	Environmental adaptation	Circadian rhythm	1	30	0.8126893	1.000000e+00	ko04710	ENSOARG00000018911(-)	K21944
Human Diseases	Immune diseases	Allograft rejection	1	30	0.8126893	1.000000e+00	ko05330	ENSOARG00000007335(DYA)	K06752
Metabolism	Global and overview maps	Metabolic pathways	58	1178	0.8147477	1.000000e+00	ko01100	ENSOARG00000000588(ACOT4);ENSOARG00000000678(OTC);ENSOARG00000001700(PLCG1);ENSOARG00000002726(PPCDC);ENSOARG00000002773(GMDS);ENSOARG00000004229(PKLR);ENSOARG00000004237(G6PD);ENSOARG00000004304(SYNJ2);ENSOARG00000005258(MCCC2);ENSOARG00000005506(ENO3);ENSOARG00000005673(TK1);ENSOARG00000005790(RDH10);ENSOARG00000006286(SGPL1);ENSOARG00000006616(DGKE);ENSOARG00000007070(GCLC);ENSOARG00000007263(…	K01068+K00611+K01116+K01598+K01711+K12406+K00036+K20279+K01969+K01689+K00857+K11151+K01634+K00901+K11204+K17989+K11987+K00922+K01837+K02684+K18081+K03841+K03841+K01785+K13368+K00699+K03018+K05857+K00251+K00789+K00972+K11160+K00693+K01106+K20279+K00281+K03006+K13247+K01431+K11146+K07436+K10808+K00757+K00021+K00943+K17398+K01231+K00921+K01011+K01490+K00901+K00451+K00058+K07514+K02999+K02325+K20736+…
Metabolism	Lipid metabolism	Arachidonic acid metabolism	2	57	0.823028	1.000000e+00	ko00590	ENSOARG00000007592(PTGS2);ENSOARG00000007965(GPX8)	K11987+K00432
Human Diseases	Immune diseases	Systemic lupus erythematosus	4	105	0.8287467	1.000000e+00	ko05322	ENSOARG00000001755(-);ENSOARG00000001878(-);ENSOARG00000005384(-);ENSOARG00000007335(DYA)	K03989+K03989+K03990+K06752
Human Diseases	Substance dependence	Morphine addiction	3	82	0.8294741	1.000000e+00	ko05032	ENSOARG00000000873(PRKCG);ENSOARG00000007096(PDE1C);ENSOARG00000016848(GABBR1)	K19663+K13755+K04615
Human Diseases	Substance dependence	Amphetamine addiction	2	58	0.8304274	1.000000e+00	ko05031	ENSOARG00000000873(PRKCG);ENSOARG00000009999(JUN)	K19663+K04448
Metabolism	Amino acid metabolism	Alanine, aspartate and glutamate metabolism	1	32	0.8325264	1.000000e+00	ko00250	MSTRG.2726(GLUD1)	K00261
Metabolism	Carbohydrate metabolism	Starch and sucrose metabolism	1	32	0.8325264	1.000000e+00	ko00500	ENSOARG00000012463(GYS1)	K00693
Human Diseases	Immune diseases	Autoimmune thyroid disease	1	33	0.8416448	1.000000e+00	ko05320	ENSOARG00000007335(DYA)	K06752
Organismal Systems	Endocrine system	Melanogenesis	3	86	0.8528884	1.000000e+00	ko04916	ENSOARG00000000873(PRKCG);ENSOARG00000002484(CREBBP);ENSOARG00000017943(EP300)	K19663+K04498+K04498
Organismal Systems	Digestive system	Pancreatic secretion	3	86	0.8528884	1.000000e+00	ko04972	ENSOARG00000000873(PRKCG);ENSOARG00000005994(TRPC1);ENSOARG00000016226(ATP2A2)	K19663+K04964+K05853
Cellular Processes	Cellular community - eukaryotes	Tight junction	6	157	0.8612572	1.000000e+00	ko04530	ENSOARG00000005093(ARHGEF2);ENSOARG00000009999(JUN);ENSOARG00000013739(TUBA8);ENSOARG00000013781(PARD6B);ENSOARG00000014624(PPP2R1B);ENSOARG00000021013(-)	K12791+K04448+K07374+K06093+K03456+K06102
Human Diseases	Cancers	Chemical carcinogenesis	2	63	0.8634003	1.000000e+00	ko05204	ENSOARG00000007592(PTGS2);ENSOARG00000009541(-)	K11987+K00699
Organismal Systems	Immune system	Chemokine signaling pathway	6	158	0.8652171	1.000000e+00	ko04062	ENSOARG00000003199(SHC1);ENSOARG00000003418(PTK2);ENSOARG00000004058(IKBKG);ENSOARG00000007664(PIK3CD);ENSOARG00000012718(NFKB1);ENSOARG00000020627(SOS2)	K06279+K05725+K07210+K00922+K02580+K03099
Metabolism	Lipid metabolism	Fatty acid degradation	1	37	0.8734276	1.000000e+00	ko00071	ENSOARG00000020569(EHHADH)	K07514
Metabolism	Lipid metabolism	Glycerophospholipid metabolism	3	91	0.8781825	1.000000e+00	ko00564	ENSOARG00000001430(PLPP5);ENSOARG00000006616(DGKE);ENSOARG00000019293(DGKD)	K18693+K00901+K00901
Organismal Systems	Digestive system	Carbohydrate digestion and absorption	1	38	0.8803242	1.000000e+00	ko04973	ENSOARG00000007664(PIK3CD)	K00922
Metabolism	Carbohydrate metabolism	Pyruvate metabolism	1	39	0.8868461	1.000000e+00	ko00620	ENSOARG00000004229(PKLR)	K12406
Organismal Systems	Excretory system	Endocrine and other factor-regulated calcium reabsorption	1	40	0.8930134	1.000000e+00	ko04961	ENSOARG00000000873(PRKCG)	K19663
Organismal Systems	Nervous system	Serotonergic synapse	3	95	0.8955641	1.000000e+00	ko04726	ENSOARG00000000873(PRKCG);ENSOARG00000005994(TRPC1);ENSOARG00000007592(PTGS2)	K19663+K04964+K11987
Metabolism	Amino acid metabolism	Tryptophan metabolism	1	41	0.8988455	1.000000e+00	ko00380	ENSOARG00000020569(EHHADH)	K07514
Organismal Systems	Immune system	Intestinal immune network for IgA production	1	41	0.8988455	1.000000e+00	ko04672	ENSOARG00000007335(DYA)	K06752
Genetic Information Processing	Transcription	Basal transcription factors	1	42	0.9043605	1.000000e+00	ko03022	ENSOARG00000014879(TAF4)	K03129
Genetic Information Processing	Folding, sorting and degradation	Proteasome	1	42	0.9043605	1.000000e+00	ko03050	ENSOARG00000003753(PSME4)	K06699
Metabolism	Glycan biosynthesis and metabolism	N-Glycan biosynthesis	1	43	0.9095757	1.000000e+00	ko00510	ENSOARG00000018880(MAN2A1)	K01231
Metabolism	Lipid metabolism	Sphingolipid metabolism	1	43	0.9095757	1.000000e+00	ko00600	ENSOARG00000006286(SGPL1)	K01634
Cellular Processes	Transport and catabolism	Endocytosis	8	218	0.9118314	1.000000e+00	ko04144	ENSOARG00000001160(ARAP3);ENSOARG00000002534(-);ENSOARG00000007782(GIT1);ENSOARG00000013781(PARD6B);ENSOARG00000017639(LDLR);ENSOARG00000017794(GBF1);ENSOARG00000018265(HGS);ENSOARG00000018775(CBLB)	K12490+K18462+K05737+K06093+K12473+K18443+K12182+K22517
Organismal Systems	Endocrine system	Insulin secretion	2	73	0.9123992	1.000000e+00	ko04911	ENSOARG00000000873(PRKCG);ENSOARG00000020471(SLC2A1)	K19663+K07299
Genetic Information Processing	Translation	Aminoacyl-tRNA biosynthesis	1	44	0.9145071	1.000000e+00	ko00970	ENSOARG00000008328(IARS)	K01870
Environmental Information Processing	Signal transduction	Hedgehog signaling pathway	1	44	0.9145071	1.000000e+00	ko04340	ENSOARG00000011676(KIF7)	K18806
Human Diseases	Neurodegenerative diseases	Alzheimer disease	5	153	0.9239671	1.000000e+00	ko05010	ENSOARG00000015165(ADAM17);ENSOARG00000016226(ATP2A2);ENSOARG00000016922(CASP8);ENSOARG00000020774(EIF2AK3);ENSOARG00000020866(IL1B)	K06059+K05853+K04398+K08860+K04519
Metabolism	Amino acid metabolism	Arginine and proline metabolism	1	47	0.9277496	1.000000e+00	ko00330	ENSOARG00000000307(SMOX)	K12259
Human Diseases	Neurodegenerative diseases	Amyotrophic lateral sclerosis (ALS)	1	47	0.9277496	1.000000e+00	ko05014	ENSOARG00000013869(MAP2K6)	K04433
Organismal Systems	Circulatory system	Vascular smooth muscle contraction	3	105	0.9296792	1.000000e+00	ko04270	ENSOARG00000000873(PRKCG);ENSOARG00000006679(ARHGEF11);ENSOARG00000011762(NPR2)	K19663+K12331+K12324
Metabolism	Global and overview maps	Fatty acid metabolism	1	48	0.9316923	1.000000e+00	ko01212	ENSOARG00000020569(EHHADH)	K07514
Metabolism	Xenobiotics biodegradation and metabolism	Drug metabolism - cytochrome P450	1	50	0.9389456	1.000000e+00	ko00982	ENSOARG00000009541(-)	K00699
Metabolism	Xenobiotics biodegradation and metabolism	Metabolism of xenobiotics by cytochrome P450	1	53	0.9484108	1.000000e+00	ko00980	ENSOARG00000009541(-)	K00699
Environmental Information Processing	Signal transduction	cGMP - PKG signaling pathway	4	140	0.9503942	1.000000e+00	ko04022	ENSOARG00000000285(INSR);ENSOARG00000011762(NPR2);ENSOARG00000016226(ATP2A2);ENSOARG00000020278(KCNJ8)	K04527+K12324+K05853+K05001
Organismal Systems	Immune system	Antigen processing and presentation	1	57	0.9587939	1.000000e+00	ko04612	ENSOARG00000007335(DYA)	K06752
Organismal Systems	Endocrine system	Renin secretion	1	60	0.9651884	1.000000e+00	ko04924	ENSOARG00000007096(PDE1C)	K13755
Organismal Systems	Nervous system	Cholinergic synapse	2	94	0.9668927	1.000000e+00	ko04725	ENSOARG00000000873(PRKCG);ENSOARG00000007664(PIK3CD)	K19663+K00922
Organismal Systems	Circulatory system	Adrenergic signaling in cardiomyocytes	3	124	0.9679967	1.000000e+00	ko04261	ENSOARG00000001512(SCN5A);ENSOARG00000014624(PPP2R1B);ENSOARG00000019143(CACNB3)	K04838+K03456+K04864
Genetic Information Processing	Folding, sorting and degradation	Protein processing in endoplasmic reticulum	4	152	0.9687552	1.000000e+00	ko04141	ENSOARG00000004167(NGLY1);ENSOARG00000007968(SEC24C);ENSOARG00000015062(SEC31B);ENSOARG00000020774(EIF2AK3)	K01456+K14007+K14005+K08860
Human Diseases	Neurodegenerative diseases	Huntington disease	5	181	0.9717585	1.000000e+00	ko05016	ENSOARG00000002484(CREBBP);ENSOARG00000013874(-);ENSOARG00000014879(TAF4);ENSOARG00000016922(CASP8);ENSOARG00000017943(EP300)	K04498+K03006+K03129+K04398+K04498
Organismal Systems	Digestive system	Gastric acid secretion	1	65	0.9737225	1.000000e+00	ko04971	ENSOARG00000000873(PRKCG)	K19663
Organismal Systems	Circulatory system	Cardiac muscle contraction	1	66	0.9751604	1.000000e+00	ko04260	ENSOARG00000019143(CACNB3)	K04864
Organismal Systems	Nervous system	Retrograde endocannabinoid signaling	3	130	0.9752477	1.000000e+00	ko04723	ENSOARG00000000873(PRKCG);ENSOARG00000007592(PTGS2);ENSOARG00000012475(ABHD6)	K19663+K11987+K13700
Environmental Information Processing	Signaling molecules and interaction	Cytokine-cytokine receptor interaction	7	236	0.9756829	1.000000e+00	ko04060	ENSOARG00000006779(INHBE);ENSOARG00000009845(OSMR);ENSOARG00000011019(CLCF1);ENSOARG00000012440(GDF15);ENSOARG00000017641(BMPR2);ENSOARG00000020866(IL1B);ENSOARG00000020877(IL1A)	K22689+K05057+K05421+K05504+K04671+K04519+K04383
Organismal Systems	Endocrine system	PPAR signaling pathway	1	68	0.977805	1.000000e+00	ko03320	ENSOARG00000020569(EHHADH)	K07514
Human Diseases	Substance dependence	Alcoholism	3	134	0.9791849	1.000000e+00	ko05034	ENSOARG00000003199(SHC1);ENSOARG00000019375(HDAC7);ENSOARG00000020627(SOS2)	K06279+K11408+K03099
Organismal Systems	Digestive system	Salivary secretion	1	73	0.983252	1.000000e+00	ko04970	ENSOARG00000000873(PRKCG)	K19663
Organismal Systems	Nervous system	Dopaminergic synapse	2	110	0.9846536	1.000000e+00	ko04728	ENSOARG00000000873(PRKCG);ENSOARG00000014624(PPP2R1B)	K19663+K03456
Cellular Processes	Transport and catabolism	Lysosome	2	118	0.989625	1.000000e+00	ko04142	ENSOARG00000010913(GGA3);ENSOARG00000020391(AP1S3)	K12404+K12395
Organismal Systems	Environmental adaptation	Thermogenesis	5	215	0.9923816	1.000000e+00	ko04714	ENSOARG00000001576(FGFR1);ENSOARG00000001827(SLC25A29);ENSOARG00000002738(MTOR);ENSOARG00000004275(ARID1A);ENSOARG00000020627(SOS2)	K04362+K15109+K07203+K11653+K03099
Genetic Information Processing	Transcription	Spliceosome	2	129	0.9939832	1.000000e+00	ko03040	ENSOARG00000013540(DDX42);ENSOARG00000019368(ACIN1)	K12835+K12875
Environmental Information Processing	Signaling molecules and interaction	Neuroactive ligand-receptor interaction	2	232	0.9999715	1.000000e+00	ko04080	ENSOARG00000013533(CHRNB1);ENSOARG00000016848(GABBR1)	K04812+K04615
Organismal Systems	Sensory system	Olfactory transduction	1	437	1	1.000000e+00	ko04740	ENSOARG00000007096(PDE1C)	K13755
