# Supplementary material for: Vitamin E Can Ameliorate Oxidative Damage of Ovine Hepatocytes In Vitro by Regulating Genes Expression Associated with Apoptosis and Pyroptosis, but Not Ferroptosis
Source: Molecules. 2021 Jul 27;26(15):4520. doi: 10.3390/molecules26154520 (PMC8348559; doi:10.3390/molecules26154520)
Supplement: Supplementary file 1 [file molecules-26-04520-s001.zip › Supplementary File 4.xls]

KEGG_A_class	KEGG_B_class	Pathway	C1-vs-T1 (765)	All (6644)	Pvalue	Qvalue	Pathway ID	Genes	K_IDs
Human Diseases	Cancers	Proteoglycans in cancer	48	172	2.085344e-09	6.381153e-07	ko05205	ENSOARG00000000570(-);ENSOARG00000000778(MET);ENSOARG00000001379(CAV2);ENSOARG00000001700(PLCG1);ENSOARG00000002738(MTOR);ENSOARG00000002885(CTNNB1);ENSOARG00000003372(FLNC);ENSOARG00000003418(PTK2);ENSOARG00000003798(PLCE1);ENSOARG00000003836(SLC9A1);ENSOARG00000004175(FZD4);ENSOARG00000004241(SMO);ENSOARG00000005050(MSN);ENSOARG00000006526(AKT2);ENSOARG00000007137(RRAS2);ENSOARG00000008132(ITPR…	K06643+K05099+K12958+K01116+K07203+K02105+K04437+K05725+K05860+K05742+K02354+K06226+K05763+K04456+K07830+K04958+K06481+K03099+K06225+K16865+K05084+K09593+K05760+K06493+K04437+K16848+K06625+K04361+K04513+K04688+K06270+K04371+K04451+K17388+K06484+K06487+K02376+K07532+K05719+K05704+K04368+K04515+K05717+K06269+K16857+K03099+K08268+K08007
Cellular Processes	Cell motility	Regulation of actin cytoskeleton	48	192	9.66655e-08	1.366138e-05	ko04810	ENSOARG00000000636(DIAPH1);ENSOARG00000002720(VAV2);ENSOARG00000003416(WASF2);ENSOARG00000003418(PTK2);ENSOARG00000003836(SLC9A1);ENSOARG00000005050(MSN);ENSOARG00000005412(ITGA3);ENSOARG00000005791(ACTN4);ENSOARG00000006044(PIP4K2C);ENSOARG00000007137(RRAS2);ENSOARG00000007578(SCIN);ENSOARG00000007782(GIT1);ENSOARG00000008212(ITGA2);ENSOARG00000008423(SOS1);ENSOARG00000008576(VCL);ENSOARG0000001…	K05740+K05730+K05748+K05725+K05742+K05763+K06482+K05699+K00920+K07830+K05768+K05737+K06481+K03099+K05700+K05766+K05732+K05760+K06493+K05743+K04438+K16848+K13708+K04361+K04513+K06270+K04371+K17388+K05750+K06484+K06487+K05750+K05767+K03914+K07532+K05719+K05704+K04368+K05751+K00921+K05717+K06269+K00907+K04410+K03099+K00889+K05699+K08007
Cellular Processes	Cellular community - eukaryotes	Adherens junction	34	116	1.339351e-07	1.366138e-05	ko04520	ENSOARG00000000285(INSR);ENSOARG00000000454(PTPRF);ENSOARG00000000778(MET);ENSOARG00000001260(CSNK2A2);ENSOARG00000002484(CREBBP);ENSOARG00000002885(CTNNB1);ENSOARG00000003416(WASF2);ENSOARG00000003455(CDH1);ENSOARG00000004662(SMAD4);ENSOARG00000005791(ACTN4);ENSOARG00000008199(PTPRJ);ENSOARG00000008576(VCL);ENSOARG00000009530(YES1);ENSOARG00000010654(CTNND1);ENSOARG00000010971(TGFBR1);ENSOARG000…	K04527+K05695+K05099+K03097+K04498+K02105+K05748+K05689+K04501+K05699+K05698+K05700+K05705+K05690+K04674+K04427+K16848+K04361+K04513+K04388+K04371+K06084+K05701+K05691+K05704+K04498+K04500+K06592+K04490+K05699+K05691+K05691+K05691+K05691
Cellular Processes	Cellular community - eukaryotes	Focal adhesion	46	185	2.137115e-07	1.634893e-05	ko04510	ENSOARG00000000636(DIAPH1);ENSOARG00000000744(LAMC2);ENSOARG00000000778(MET);ENSOARG00000001039(RAP1B);ENSOARG00000001379(CAV2);ENSOARG00000001468(MAPK8);ENSOARG00000002720(VAV2);ENSOARG00000002885(CTNNB1);ENSOARG00000003199(SHC1);ENSOARG00000003372(FLNC);ENSOARG00000003418(PTK2);ENSOARG00000005412(ITGA3);ENSOARG00000005791(ACTN4);ENSOARG00000005941(TNC);ENSOARG00000006521(RAPGEF1);ENSOARG0000000…	K05740+K06246+K05099+K07836+K12958+K04440+K05730+K02105+K06279+K04437+K05725+K06482+K05699+K06252+K06277+K04456+K06481+K06275+K03099+K05700+K06274+K05732+K05760+K06493+K06271+K04438+K04437+K13708+K04361+K04513+K06270+K04371+K17388+K06484+K06487+K05719+K05704+K04368+K05717+K06269+K16857+K00907+K04410+K06237+K03099+K05699
Human Diseases	Cancers	MicroRNAs in cancer	35	129	6.930527e-07	4.241483e-05	ko05206	ENSOARG00000000488(RPTOR);ENSOARG00000000570(-);ENSOARG00000000590(-);ENSOARG00000000778(MET);ENSOARG00000001463(-);ENSOARG00000001700(PLCG1);ENSOARG00000002484(CREBBP);ENSOARG00000002738(MTOR);ENSOARG00000003199(SHC1);ENSOARG00000005941(TNC);ENSOARG00000007419(ABL1);ENSOARG00000007592(PTGS2);ENSOARG00000008423(SOS1);ENSOARG00000008935(HNRNPK);ENSOARG00000010432(PDCD4);ENSOARG00000010448(ERBB3);E…	K07204+K06643+K12886+K05099+K11459+K01116+K04498+K07203+K06279+K06252+K06619+K11987+K03099+K12886+K16865+K05084+K17461+K06493+K13863+K04438+K02580+K06625+K04361+K04513+K10145+K07436+K04451+K06484+K04498+K04368+K16857+K20994+K16172+K03099+K08007
Cellular Processes	Transport and catabolism	Endocytosis	49	218	2.183954e-06	1.113817e-04	ko04144	ENSOARG00000000043(RAB11FIP2);ENSOARG00000000161(-);ENSOARG00000000570(-);ENSOARG00000000619(RAB8A);ENSOARG00000001379(CAV2);ENSOARG00000003538(CYTH1);ENSOARG00000003803(IST1);ENSOARG00000004233(PML);ENSOARG00000004632(IGF2R);ENSOARG00000005073(GRK6);ENSOARG00000005192(ARFGAP2);ENSOARG00000006303(VPS4B);ENSOARG00000006349(AP2B1);ENSOARG00000006511(ARF1);ENSOARG00000006613(-);ENSOARG00000007782(GI…	K12484+K10364+K06643+K07901+K12958+K18441+K19476+K10054+K06564+K08291+K12493+K12196+K11825+K07937+K11826+K05737+K18464+K12475+K11247+K15053+K07888+K04674+K12469+K04705+K12489+K12186+K04361+K06093+K04513+K04679+K04388+K12488+K18468+K12478+K12192+K12481+K18465+K12473+K05704+K04500+K12471+K22517+K12493+K17919+K12486+K06503+K12477+K00889+K11839
Human Diseases	Cancers	Pathways in cancer	90	501	6.219389e-06	2.718761e-04	ko05200	ENSOARG00000000510(IFNGR1);ENSOARG00000000570(-);ENSOARG00000000744(LAMC2);ENSOARG00000000778(MET);ENSOARG00000001078(-);ENSOARG00000001262(BCL2L1);ENSOARG00000001468(MAPK8);ENSOARG00000001700(PLCG1);ENSOARG00000001845(TPM3);ENSOARG00000002417(-);ENSOARG00000002484(CREBBP);ENSOARG00000002562(IL6R);ENSOARG00000002738(MTOR);ENSOARG00000002885(CTNNB1);ENSOARG00000003418(PTK2);ENSOARG00000003455(CDH1…	K05132+K06643+K06246+K05099+K03173+K04570+K04440+K01116+K09290+K09289+K04498+K05055+K07203+K02105+K05725+K05689+K00355+K02354+K10054+K06226+K04501+K06482+K04456+K06619+K11225+K11987+K06481+K06618+K03099+K06225+K11221+K04399+K11217+K04630+K04674+K08803+K04504+K04438+K02580+K00799+K07835+K02678+K05130+K05131+K06625+K04361+K04513+K04688+K04388+K03068+K04166+K04371+K04451+K17388+K05076+K06487+K02376+…
Environmental Information Processing	Signal transduction	HIF-1 signaling pathway	26	93	1.044563e-05	3.995453e-04	ko04066	ENSOARG00000000285(INSR);ENSOARG00000000510(IFNGR1);ENSOARG00000001700(PLCG1);ENSOARG00000002484(CREBBP);ENSOARG00000002562(IL6R);ENSOARG00000002738(MTOR);ENSOARG00000006526(AKT2);ENSOARG00000008343(LTBR);ENSOARG00000008456(TF);ENSOARG00000012718(NFKB1);ENSOARG00000013636(CDKN1A);ENSOARG00000013753(EGFR);ENSOARG00000014401(-);ENSOARG00000014550(-);ENSOARG00000015262(SERPINE1);ENSOARG00000015529(M…	K04527+K05132+K01116+K04498+K05055+K07203+K04456+K03159+K14736+K02580+K06625+K04361+K04688+K00161+K03982+K04371+K03259+K03870+K04735+K04498+K04368+K04515+K21421+K06503+K07299+K08268
Human Diseases	Infectious diseases	Human cytomegalovirus infection	41	182	1.405566e-05	4.778924e-04	ko05163	ENSOARG00000000123(-);ENSOARG00000000570(-);ENSOARG00000001078(-);ENSOARG00000002562(IL6R);ENSOARG00000002738(MTOR);ENSOARG00000002885(CTNNB1);ENSOARG00000003418(PTK2);ENSOARG00000006526(AKT2);ENSOARG00000007592(PTGS2);ENSOARG00000007625(IL10RA);ENSOARG00000008132(ITPR1);ENSOARG00000008246(RB1);ENSOARG00000008423(SOS1);ENSOARG00000009701(CASP9);ENSOARG00000009957(CREB3L2);ENSOARG00000010117(JAK1)…	K05508+K06643+K03173+K05055+K07203+K02105+K05725+K04456+K11987+K05134+K04958+K06618+K03099+K04399+K09048+K11217+K04630+K16529+K05760+K06493+K04438+K02580+K04386+K06625+K04361+K04513+K04688+K04371+K04451+K17388+K06487+K08047+K07532+K04630+K04735+K05704+K04368+K08046+K04630+K03099+K03158
Environmental Information Processing	Signal transduction	ErbB signaling pathway	23	80	2.045945e-05	6.260592e-04	ko04012	ENSOARG00000001468(MAPK8);ENSOARG00000001700(PLCG1);ENSOARG00000002738(MTOR);ENSOARG00000003199(SHC1);ENSOARG00000003418(PTK2);ENSOARG00000006526(AKT2);ENSOARG00000007419(ABL1);ENSOARG00000007798(NCK1);ENSOARG00000008423(SOS1);ENSOARG00000010448(ERBB3);ENSOARG00000010978(GAB1);ENSOARG00000012278(CRK);ENSOARG00000013636(CDKN1A);ENSOARG00000013753(EGFR);ENSOARG00000014401(-);ENSOARG00000015404(MAP2…	K04440+K01116+K07203+K06279+K05725+K04456+K06619+K07365+K03099+K05084+K09593+K04438+K06625+K04361+K04688+K04430+K04371+K05704+K04368+K04515+K22517+K04410+K03099
Human Diseases	Cancers	Pancreatic cancer	21	70	2.295287e-05	6.385071e-04	ko05212	ENSOARG00000001262(BCL2L1);ENSOARG00000001468(MAPK8);ENSOARG00000002738(MTOR);ENSOARG00000004662(SMAD4);ENSOARG00000006526(AKT2);ENSOARG00000008246(RB1);ENSOARG00000009701(CASP9);ENSOARG00000010117(JAK1);ENSOARG00000010971(TGFBR1);ENSOARG00000012718(NFKB1);ENSOARG00000012973(RALB);ENSOARG00000013636(CDKN1A);ENSOARG00000013753(EGFR);ENSOARG00000014401(-);ENSOARG00000014726(TGFBR2);ENSOARG000000155…	K04570+K04440+K07203+K04501+K04456+K06618+K04399+K11217+K04674+K02580+K07835+K06625+K04361+K04688+K04388+K04371+K04451+K03511+K04735+K04368+K04500
Human Diseases	Infectious diseases	Human papillomavirus infection	57	291	2.923003e-05	7.453658e-04	ko05165	ENSOARG00000000103(-);ENSOARG00000000358(PSEN1);ENSOARG00000000570(-);ENSOARG00000000744(LAMC2);ENSOARG00000002484(CREBBP);ENSOARG00000002738(MTOR);ENSOARG00000002885(CTNNB1);ENSOARG00000003418(PTK2);ENSOARG00000004175(FZD4);ENSOARG00000004776(PPP2R5D);ENSOARG00000005412(ITGA3);ENSOARG00000005941(TNC);ENSOARG00000006526(AKT2);ENSOARG00000007233(ISG15);ENSOARG00000007592(PTGS2);ENSOARG00000008030(…	K04382+K04505+K06643+K06246+K04498+K07203+K02105+K05725+K02354+K11584+K06482+K06252+K04456+K12159+K11987+K11583+K05401+K06481+K06618+K03099+K11221+K09048+K11217+K11584+K05760+K06493+K02580+K05130+K05131+K06625+K04361+K06093+K04688+K03456+K04371+K04451+K06484+K06487+K02376+K02148+K04735+K05719+K11405+K16332+K04498+K04368+K05717+K11408+K02145+K16857+K20994+K04490+K06237+K03099+K11584+K02149+K03158
Human Diseases	Cancers	Renal cell carcinoma	20	67	3.881476e-05	8.961015e-04	ko05211	ENSOARG00000000778(MET);ENSOARG00000001039(RAP1B);ENSOARG00000002034(FLCN);ENSOARG00000002484(CREBBP);ENSOARG00000006521(RAPGEF1);ENSOARG00000006526(AKT2);ENSOARG00000008423(SOS1);ENSOARG00000010978(GAB1);ENSOARG00000011157(TFE3);ENSOARG00000012278(CRK);ENSOARG00000013102(ETS1);ENSOARG00000013636(CDKN1A);ENSOARG00000015529(MAPK1);ENSOARG00000017029(CUL2);ENSOARG00000017943(EP300);ENSOARG000000181…	K05099+K07836+K09594+K04498+K06277+K04456+K03099+K09593+K09105+K04438+K02678+K06625+K04371+K03870+K04498+K04368+K04410+K07299+K03099+K08268
Cellular Processes	Transport and catabolism	Mitophagy - animal	18	57	4.099811e-05	8.961015e-04	ko04137	ENSOARG00000001260(CSNK2A2);ENSOARG00000001262(BCL2L1);ENSOARG00000001468(MAPK8);ENSOARG00000002683(SQSTM1);ENSOARG00000003608(AMBRA1);ENSOARG00000006705(CALCOCO2);ENSOARG00000007137(RRAS2);ENSOARG00000010741(FOXO3);ENSOARG00000011157(TFE3);ENSOARG00000013499(ULK1);ENSOARG00000015571(TP53);ENSOARG00000017038(USP30);ENSOARG00000017426(RELA);ENSOARG00000017940(SRC);ENSOARG00000020774(EIF2AK3);ENSOA…	K03097+K04570+K04440+K14381+K17985+K21348+K07830+K09408+K09105+K21357+K04451+K11851+K04735+K05704+K08860+K11839+K08341+K08268
Organismal Systems	Immune system	Platelet activation	28	113	5.538624e-05	1.129879e-03	ko04611	ENSOARG00000001039(RAP1B);ENSOARG00000001632(STIM1);ENSOARG00000006526(AKT2);ENSOARG00000007989(GUCY1B1);ENSOARG00000008132(ITPR1);ENSOARG00000008212(ITGA2);ENSOARG00000010075(VASP);ENSOARG00000010164(GNAI2);ENSOARG00000010829(ARHGAP35);ENSOARG00000011855(-);ENSOARG00000011863(TLN1);ENSOARG00000013860(RHOA);ENSOARG00000014778(LYN);ENSOARG00000015054(PPP1R12A);ENSOARG00000015529(MAPK1);ENSOARG0000…	K07836+K16059+K04456+K12319+K04958+K06481+K06274+K04630+K05732+K06493+K06271+K04513+K05854+K06270+K04371+K17388+K17704+K03914+K08047+K07532+K04630+K05719+K05704+K08046+K04630+K06269+K00907+K08508
Human Diseases	Cancers	Chronic myeloid leukemia	20	69	6.188229e-05	1.180216e-03	ko05220	ENSOARG00000000570(-);ENSOARG00000001262(BCL2L1);ENSOARG00000003199(SHC1);ENSOARG00000004662(SMAD4);ENSOARG00000006340(GAB2);ENSOARG00000006526(AKT2);ENSOARG00000007419(ABL1);ENSOARG00000008246(RB1);ENSOARG00000008423(SOS1);ENSOARG00000010971(TGFBR1);ENSOARG00000012278(CRK);ENSOARG00000012718(NFKB1);ENSOARG00000013636(CDKN1A);ENSOARG00000014726(TGFBR2);ENSOARG00000015529(MAPK1);ENSOARG00000015571…	K06643+K04570+K06279+K04501+K08091+K04456+K06619+K06618+K03099+K04674+K04438+K02580+K06625+K04388+K04371+K04451+K03511+K04735+K04368+K03099
Environmental Information Processing	Signal transduction	Sphingolipid signaling pathway	28	114	6.556756e-05	1.180216e-03	ko04071	ENSOARG00000000103(-);ENSOARG00000001078(-);ENSOARG00000001468(MAPK8);ENSOARG00000004776(PPP2R5D);ENSOARG00000006286(SGPL1);ENSOARG00000006340(GAB2);ENSOARG00000006526(AKT2);ENSOARG00000007870(SPTLC1);ENSOARG00000008030(PPP2R3A);ENSOARG00000010164(GNAI2);ENSOARG00000010759(PPP2R5A);ENSOARG00000012718(NFKB1);ENSOARG00000013860(RHOA);ENSOARG00000013961(SGMS1);ENSOARG00000014624(PPP2R1B);ENSOARG0000…	K04382+K03173+K04440+K11584+K01634+K08091+K04456+K00654+K11583+K04630+K11584+K02580+K04513+K04714+K03456+K04371+K04451+K04712+K17388+K04630+K04735+K04368+K04630+K04710+K11584+K04716+K03158+K04295
Environmental Information Processing	Signal transduction	AMPK signaling pathway	28	116	9.112363e-05	1.549102e-03	ko04152	ENSOARG00000000103(-);ENSOARG00000000285(INSR);ENSOARG00000000488(RPTOR);ENSOARG00000000619(RAB8A);ENSOARG00000001411(PRKAB1);ENSOARG00000002738(MTOR);ENSOARG00000003168(ELAVL1);ENSOARG00000003928(HNF4A);ENSOARG00000004776(PPP2R5D);ENSOARG00000005886(PFKFB1);ENSOARG00000006526(AKT2);ENSOARG00000008030(PPP2R3A);ENSOARG00000009957(CREB3L2);ENSOARG00000010741(FOXO3);ENSOARG00000010759(PPP2R5A);ENSOA…	K04382+K04527+K07204+K07901+K07199+K07203+K13088+K07292+K11584+K19028+K04456+K11583+K09048+K09408+K11584+K07191+K04427+K21357+K04688+K03456+K00507+K06259+K06259+K05031+K07200+K16172+K08272+K11584
Environmental Information Processing	Signal transduction	FoxO signaling pathway	28	122	0.0002296615	3.513821e-03	ko04068	ENSOARG00000000285(INSR);ENSOARG00000000570(-);ENSOARG00000001411(PRKAB1);ENSOARG00000001468(MAPK8);ENSOARG00000002484(CREBBP);ENSOARG00000004662(SMAD4);ENSOARG00000006526(AKT2);ENSOARG00000008423(SOS1);ENSOARG00000010741(FOXO3);ENSOARG00000010971(TGFBR1);ENSOARG00000011448(SLC2A4);ENSOARG00000013062(SETD7);ENSOARG00000013511(FBXO25);ENSOARG00000013636(CDKN1A);ENSOARG00000013753(EGFR);ENSOARG0000…	K04527+K06643+K07199+K04440+K04498+K04501+K04456+K03099+K09408+K04674+K07191+K11431+K10305+K06625+K04361+K04388+K08960+K04371+K16332+K04498+K04368+K04500+K03781+K07200+K16172+K03099+K08341+K05868
Human Diseases	Infectious diseases	Hepatitis B	28	122	0.0002296615	3.513821e-03	ko05161	ENSOARG00000000939(MAVS);ENSOARG00000001031(MYD88);ENSOARG00000001468(MAPK8);ENSOARG00000002484(CREBBP);ENSOARG00000004662(SMAD4);ENSOARG00000006526(AKT2);ENSOARG00000007392(MAP3K1);ENSOARG00000007588(STAT6);ENSOARG00000008057(TLR3);ENSOARG00000008246(RB1);ENSOARG00000009154(STAT2);ENSOARG00000009701(CASP9);ENSOARG00000009957(CREB3L2);ENSOARG00000010117(JAK1);ENSOARG00000010971(TGFBR1);ENSOARG000…	K12648+K04729+K04440+K04498+K04501+K04456+K04416+K11225+K05401+K06618+K11221+K04399+K09048+K11217+K04674+K10610+K02580+K05130+K06625+K16197+K04430+K04371+K04451+K04735+K05704+K04498+K04368+K16197
Organismal Systems	Digestive system	Cholesterol metabolism	14	44	0.000266855	3.576076e-03	ko04979	ENSOARG00000001778(-);ENSOARG00000004007(LIPG);ENSOARG00000007332(LRP1);ENSOARG00000007344(ABCA1);ENSOARG00000007905(NPC1);ENSOARG00000009808(APOA2);ENSOARG00000013705(VDAC1);ENSOARG00000016678(SOAT1);ENSOARG00000016688(SOAT2);ENSOARG00000017020(-);ENSOARG00000017123(-);ENSOARG00000017143(VAPB);ENSOARG00000017402(APOB);ENSOARG00000017639(LDLR)	K20464+K22284+K04550+K05641+K12385+K08758+K05862+K00637+K00637+K06259+K06259+K10707+K14462+K12473
Cellular Processes	Transport and catabolism	Autophagy - animal	27	117	0.00026879	3.576076e-03	ko04140	ENSOARG00000000103(-);ENSOARG00000000488(RPTOR);ENSOARG00000001262(BCL2L1);ENSOARG00000001468(MAPK8);ENSOARG00000002738(MTOR);ENSOARG00000003608(AMBRA1);ENSOARG00000003799(ATG13);ENSOARG00000006526(AKT2);ENSOARG00000007137(RRAS2);ENSOARG00000008132(ITPR1);ENSOARG00000011263(DAPK3);ENSOARG00000012321(MAP3K7);ENSOARG00000012416(-);ENSOARG00000013499(ULK1);ENSOARG00000013632(RB1CC1);ENSOARG000000144…	K04382+K07204+K04570+K04440+K07203+K17985+K08331+K04456+K07830+K04958+K08803+K04427+K21249+K21357+K17589+K04688+K01363+K04371+K17906+K04368+K16186+K16172+K08803+K08860+K08341+K17889+K08268
Environmental Information Processing	Signal transduction	Apelin signaling pathway	27	117	0.00026879	3.576076e-03	ko04371	ENSOARG00000001411(PRKAB1);ENSOARG00000002738(MTOR);ENSOARG00000003455(CDH1);ENSOARG00000003836(SLC9A1);ENSOARG00000004662(SMAD4);ENSOARG00000006517(PDE3B);ENSOARG00000006526(AKT2);ENSOARG00000007137(RRAS2);ENSOARG00000008132(ITPR1);ENSOARG00000009878(MEF2A);ENSOARG00000010164(GNAI2);ENSOARG00000010971(TGFBR1);ENSOARG00000014240(CCN2);ENSOARG00000014401(-);ENSOARG00000015262(SERPINE1);ENSOARG0000…	K07199+K07203+K05689+K05742+K04501+K13296+K04456+K07830+K04958+K09260+K04630+K04674+K06827+K04688+K03982+K04166+K04371+K09203+K08047+K04630+K04368+K04500+K07200+K08046+K04630+K00907+K08341
Human Diseases	Infectious diseases	Kaposi sarcoma-associated herpesvirus infection	32	149	0.0003104313	3.846394e-03	ko05167	ENSOARG00000000510(IFNGR1);ENSOARG00000001078(-);ENSOARG00000001468(MAPK8);ENSOARG00000001700(PLCG1);ENSOARG00000002484(CREBBP);ENSOARG00000002738(MTOR);ENSOARG00000002885(CTNNB1);ENSOARG00000006526(AKT2);ENSOARG00000007592(PTGS2);ENSOARG00000008057(TLR3);ENSOARG00000008132(ITPR1);ENSOARG00000008246(RB1);ENSOARG00000009154(STAT2);ENSOARG00000009701(CASP9);ENSOARG00000010117(JAK1);ENSOARG000000127…	K05132+K03173+K04440+K01116+K04498+K07203+K02105+K04456+K11987+K05401+K04958+K06618+K11221+K04399+K11217+K02580+K05130+K05131+K06625+K05854+K04430+K04371+K04451+K06490+K04735+K05704+K04498+K04368+K08341+K17889+K08268+K03158
Human Diseases	Infectious diseases	Hepatitis C	26	112	0.0003142479	3.846394e-03	ko05160	ENSOARG00000000103(-);ENSOARG00000000939(MAVS);ENSOARG00000001078(-);ENSOARG00000001468(MAPK8);ENSOARG00000001667(EIF2AK1);ENSOARG00000005551(OCLN);ENSOARG00000006526(AKT2);ENSOARG00000008057(TLR3);ENSOARG00000008423(SOS1);ENSOARG00000009154(STAT2);ENSOARG00000010117(JAK1);ENSOARG00000010602(CLDN6);ENSOARG00000012718(NFKB1);ENSOARG00000013188(IFNAR1);ENSOARG00000013309(IFNAR2);ENSOARG00000013636(…	K04382+K12648+K03173+K04440+K16194+K06088+K04456+K05401+K03099+K11221+K11217+K06087+K02580+K05130+K05131+K06625+K04361+K03456+K04371+K04451+K04735+K12473+K06087+K03099+K08860+K03158
Human Diseases	Cancers	Bladder cancer	12	35	0.0003350693	3.943508e-03	ko05219	ENSOARG00000000570(-);ENSOARG00000003455(CDH1);ENSOARG00000008246(RB1);ENSOARG00000011263(DAPK3);ENSOARG00000013636(CDKN1A);ENSOARG00000013753(EGFR);ENSOARG00000015529(MAPK1);ENSOARG00000015571(TP53);ENSOARG00000017940(SRC);ENSOARG00000018185(MAP2K1);ENSOARG00000020058(THBS1);ENSOARG00000020760(DAPK2)	K06643+K05689+K06618+K08803+K06625+K04361+K04371+K04451+K05704+K04368+K16857+K08803
Human Diseases	Cancers	Hepatocellular carcinoma	32	150	0.0003523838	3.993683e-03	ko05225	ENSOARG00000000778(MET);ENSOARG00000001262(BCL2L1);ENSOARG00000001700(PLCG1);ENSOARG00000002738(MTOR);ENSOARG00000002751(PBRM1);ENSOARG00000002885(CTNNB1);ENSOARG00000003199(SHC1);ENSOARG00000003601(NQO1);ENSOARG00000004175(FZD4);ENSOARG00000004275(ARID1A);ENSOARG00000004662(SMAD4);ENSOARG00000006526(AKT2);ENSOARG00000008246(RB1);ENSOARG00000008423(SOS1);ENSOARG00000010971(TGFBR1);ENSOARG00000010…	K05099+K04570+K01116+K07203+K11757+K02105+K06279+K00355+K02354+K11653+K04501+K04456+K06618+K03099+K04674+K09593+K00799+K06625+K04361+K11650+K04688+K04388+K03068+K04371+K04451+K02376+K03511+K22182+K04368+K04500+K04490+K03099
Human Diseases	Drug resistance	Endocrine resistance	21	84	0.0004054823	4.247915e-03	ko01522	ENSOARG00000000570(-);ENSOARG00000001468(MAPK8);ENSOARG00000002738(MTOR);ENSOARG00000003199(SHC1);ENSOARG00000003418(PTK2);ENSOARG00000006526(AKT2);ENSOARG00000008246(RB1);ENSOARG00000008423(SOS1);ENSOARG00000011074(MED1);ENSOARG00000013636(CDKN1A);ENSOARG00000013753(EGFR);ENSOARG00000014401(-);ENSOARG00000015529(MAPK1);ENSOARG00000015571(TP53);ENSOARG00000017199(ADCY7);ENSOARG00000017317(CARM1);…	K06643+K04440+K07203+K06279+K05725+K04456+K06618+K03099+K15144+K06625+K04361+K04688+K04371+K04451+K08047+K05931+K05704+K04368+K08046+K20994+K03099
Human Diseases	Infectious diseases	Influenza A	31	145	0.0004169106	4.247915e-03	ko05164	ENSOARG00000000510(IFNGR1);ENSOARG00000000939(MAVS);ENSOARG00000001031(MYD88);ENSOARG00000001468(MAPK8);ENSOARG00000001667(EIF2AK1);ENSOARG00000002200(NUP98);ENSOARG00000002484(CREBBP);ENSOARG00000002612(MAP2K3);ENSOARG00000002952(ADAR);ENSOARG00000004233(PML);ENSOARG00000006526(AKT2);ENSOARG00000008057(TLR3);ENSOARG00000009154(STAT2);ENSOARG00000009701(CASP9);ENSOARG00000010117(JAK1);ENSOARG0000…	K05132+K12648+K04729+K04440+K16194+K14297+K04498+K04432+K12968+K10054+K04456+K05401+K11221+K04399+K11217+K02580+K01349+K05130+K05131+K05862+K04430+K04371+K06490+K04735+K04498+K14298+K04368+K15042+K08860+K03158+K15047
Organismal Systems	Nervous system	Neurotrophin signaling pathway	26	114	0.0004221164	4.247915e-03	ko04722	ENSOARG00000000358(PSEN1);ENSOARG00000001039(RAP1B);ENSOARG00000001468(MAPK8);ENSOARG00000001700(PLCG1);ENSOARG00000003199(SHC1);ENSOARG00000005875(IRAK1);ENSOARG00000006521(RAPGEF1);ENSOARG00000006526(AKT2);ENSOARG00000007392(MAP3K1);ENSOARG00000007419(ABL1);ENSOARG00000008423(SOS1);ENSOARG00000010741(FOXO3);ENSOARG00000010978(GAB1);ENSOARG00000012237(-);ENSOARG00000012278(CRK);ENSOARG0000001271…	K04505+K07836+K04440+K01116+K06279+K04730+K06277+K04456+K04416+K06619+K03099+K09408+K09593+K06630+K04438+K02580+K04513+K12460+K04371+K04451+K04735+K04368+K04515+K02582+K16172+K03099
Organismal Systems	Development	Axon guidance	33	158	0.0004303443	4.247915e-03	ko04360	ENSOARG00000000778(MET);ENSOARG00000001700(PLCG1);ENSOARG00000003418(PTK2);ENSOARG00000004241(SMO);ENSOARG00000005014(ABLIM3);ENSOARG00000006382(UNC5B);ENSOARG00000006427(PLXNA4);ENSOARG00000007419(ABL1);ENSOARG00000007798(NCK1);ENSOARG00000008578(PTCH1);ENSOARG00000010164(GNAI2);ENSOARG00000010775(SSH3);ENSOARG00000011910(LIMK1);ENSOARG00000012066(SEMA4B);ENSOARG00000013713(SEMA4C);ENSOARG000000…	K05099+K01116+K05725+K06226+K07520+K07521+K06820+K06619+K07365+K06225+K04630+K05766+K05743+K06521+K06521+K06093+K04513+K05463+K04371+K05113+K06572+K17388+K06521+K06754+K06753+K07532+K04630+K06724+K05719+K05704+K04515+K04630+K04410
Organismal Systems	Immune system	Leukocyte transendothelial migration	32	152	0.0004516633	4.300314e-03	ko04670	ENSOARG00000001039(RAP1B);ENSOARG00000001700(PLCG1);ENSOARG00000002720(VAV2);ENSOARG00000002885(CTNNB1);ENSOARG00000003418(PTK2);ENSOARG00000005050(MSN);ENSOARG00000005551(OCLN);ENSOARG00000005791(ACTN4);ENSOARG00000008576(VCL);ENSOARG00000009280(F11R);ENSOARG00000010075(VASP);ENSOARG00000010164(GNAI2);ENSOARG00000010602(CLDN6);ENSOARG00000010654(CTNND1);ENSOARG00000010829(ARHGAP35);ENSOARG000000…	K07836+K01116+K05730+K02105+K05725+K05763+K06088+K05699+K05700+K06089+K06274+K04630+K06087+K05690+K05732+K05760+K04513+K06471+K06490+K17388+K05691+K04630+K05719+K21421+K04630+K06087+K05699+K05691+K05691+K05691+K05691+K08007
Organismal Systems	Aging	Longevity regulating pathway - mammal	20	79	0.0004637594	4.300314e-03	ko04211	ENSOARG00000000285(INSR);ENSOARG00000000488(RPTOR);ENSOARG00000001411(PRKAB1);ENSOARG00000002738(MTOR);ENSOARG00000003799(ATG13);ENSOARG00000006526(AKT2);ENSOARG00000009957(CREB3L2);ENSOARG00000010741(FOXO3);ENSOARG00000012718(NFKB1);ENSOARG00000013499(ULK1);ENSOARG00000013632(RB1CC1);ENSOARG00000014401(-);ENSOARG00000015571(TP53);ENSOARG00000015905(EIF4E);ENSOARG00000017199(ADCY7);ENSOARG0000001…	K04527+K07204+K07199+K07203+K08331+K04456+K09048+K09408+K02580+K21357+K17589+K04688+K04451+K03259+K08047+K04735+K03781+K07200+K08046+K16172
Human Diseases	Infectious diseases	Bacterial invasion of epithelial cells	26	115	0.0004873583	4.386225e-03	ko05100	ENSOARG00000000778(MET);ENSOARG00000001379(CAV2);ENSOARG00000002885(CTNNB1);ENSOARG00000003199(SHC1);ENSOARG00000003416(WASF2);ENSOARG00000003418(PTK2);ENSOARG00000003455(CDH1);ENSOARG00000003585(ELMO1);ENSOARG00000006205(SEPT9);ENSOARG00000008576(VCL);ENSOARG00000008824(ELMO2);ENSOARG00000010978(GAB1);ENSOARG00000011850(PXN);ENSOARG00000012278(CRK);ENSOARG00000013080(DOCK1);ENSOARG00000013860(RH…	K05099+K12958+K02105+K06279+K05748+K05725+K05689+K12366+K16938+K05700+K18985+K09593+K05760+K04438+K13708+K04513+K06484+K05691+K16939+K05719+K05704+K05717+K05691+K05691+K05691+K05691
Human Diseases	Drug resistance	EGFR tyrosine kinase inhibitor resistance	19	74	0.0005280715	4.616854e-03	ko01521	ENSOARG00000000778(MET);ENSOARG00000001262(BCL2L1);ENSOARG00000001700(PLCG1);ENSOARG00000002562(IL6R);ENSOARG00000002738(MTOR);ENSOARG00000003199(SHC1);ENSOARG00000006526(AKT2);ENSOARG00000008423(SOS1);ENSOARG00000010117(JAK1);ENSOARG00000010448(ERBB3);ENSOARG00000010741(FOXO3);ENSOARG00000010978(GAB1);ENSOARG00000013753(EGFR);ENSOARG00000014401(-);ENSOARG00000015529(MAPK1);ENSOARG00000015905(EIF…	K05099+K04570+K01116+K05055+K07203+K06279+K04456+K03099+K11217+K05084+K09408+K09593+K04361+K04688+K04371+K03259+K05704+K04368+K03099
Human Diseases	Cancers	Colorectal cancer	21	86	0.0005697498	4.791724e-03	ko05210	ENSOARG00000001468(MAPK8);ENSOARG00000002738(MTOR);ENSOARG00000002885(CTNNB1);ENSOARG00000004662(SMAD4);ENSOARG00000006526(AKT2);ENSOARG00000008423(SOS1);ENSOARG00000009701(CASP9);ENSOARG00000010971(TGFBR1);ENSOARG00000012973(RALB);ENSOARG00000013636(CDKN1A);ENSOARG00000013753(EGFR);ENSOARG00000013860(RHOA);ENSOARG00000014401(-);ENSOARG00000014726(TGFBR2);ENSOARG00000015529(MAPK1);ENSOARG00000015…	K04440+K07203+K02105+K04501+K04456+K03099+K04399+K04674+K07835+K06625+K04361+K04513+K04688+K04388+K04371+K04451+K03511+K04368+K04500+K04490+K03099
Organismal Systems	Development	Osteoclast differentiation	24	104	0.0005793915	4.791724e-03	ko04380	ENSOARG00000000510(IFNGR1);ENSOARG00000001078(-);ENSOARG00000001468(MAPK8);ENSOARG00000002578(TAB2);ENSOARG00000002683(SQSTM1);ENSOARG00000006340(GAB2);ENSOARG00000006526(AKT2);ENSOARG00000009154(STAT2);ENSOARG00000009983(FOSB);ENSOARG00000010117(JAK1);ENSOARG00000010971(TGFBR1);ENSOARG00000011855(-);ENSOARG00000012321(MAP3K7);ENSOARG00000012718(NFKB1);ENSOARG00000013144(IL1R1);ENSOARG00000013188…	K05132+K03173+K04440+K04404+K14381+K08091+K04456+K11221+K09029+K11217+K04674+K06493+K04427+K02580+K04386+K05130+K05131+K04388+K04371+K07364+K04735+K04368+K05453+K03158
Environmental Information Processing	Signal transduction	Rap1 signaling pathway	36	181	0.0006397899	5.086690e-03	ko04015	ENSOARG00000000285(INSR);ENSOARG00000000778(MET);ENSOARG00000001039(RAP1B);ENSOARG00000001111(ID1);ENSOARG00000001700(PLCG1);ENSOARG00000002302(RAPGEF2);ENSOARG00000002612(MAP2K3);ENSOARG00000002885(CTNNB1);ENSOARG00000003455(CDH1);ENSOARG00000003798(PLCE1);ENSOARG00000005522(SIPA1L3);ENSOARG00000006521(RAPGEF1);ENSOARG00000006526(AKT2);ENSOARG00000010075(VASP);ENSOARG00000010164(GNAI2);ENSOARG00…	K04527+K05099+K07836+K04680+K01116+K08018+K04432+K02105+K05689+K05860+K17703+K06277+K04456+K06274+K04630+K05690+K06493+K06271+K04438+K07835+K04361+K06093+K04513+K04371+K17704+K03914+K08047+K04630+K05719+K05704+K04368+K08046+K04630+K05453+K16857+K02582
Human Diseases	Infectious diseases	Epstein-Barr virus infection	34	168	0.0006483036	5.086690e-03	ko05169	ENSOARG00000000357(NCOR2);ENSOARG00000000569(TNFAIP3);ENSOARG00000000570(-);ENSOARG00000001078(-);ENSOARG00000001260(CSNK2A2);ENSOARG00000001468(MAPK8);ENSOARG00000001667(EIF2AK1);ENSOARG00000001700(PLCG1);ENSOARG00000002484(CREBBP);ENSOARG00000002578(TAB2);ENSOARG00000002612(MAP2K3);ENSOARG00000002671(SNW1);ENSOARG00000003365(FGR);ENSOARG00000005875(IRAK1);ENSOARG00000006526(AKT2);ENSOARG0000000…	K06065+K11859+K06643+K03173+K03097+K04440+K16194+K01116+K04498+K04404+K04432+K06063+K08891+K04730+K04456+K05134+K06618+K11217+K06630+K04427+K02580+K06625+K03006+K05854+K16197+K04430+K04451+K06490+K04735+K03064+K04498+K16197+K06492+K08860
Environmental Information Processing	Signal transduction	PI3K-Akt signaling pathway	55	312	0.0006955695	5.247868e-03	ko04151	ENSOARG00000000103(-);ENSOARG00000000285(INSR);ENSOARG00000000488(RPTOR);ENSOARG00000000570(-);ENSOARG00000000744(LAMC2);ENSOARG00000000778(MET);ENSOARG00000001262(BCL2L1);ENSOARG00000002562(IL6R);ENSOARG00000002738(MTOR);ENSOARG00000003418(PTK2);ENSOARG00000003862(PHLPP2);ENSOARG00000004776(PPP2R5D);ENSOARG00000005412(ITGA3);ENSOARG00000005941(TNC);ENSOARG00000006526(AKT2);ENSOARG00000008030(PPP…	K04382+K04527+K07204+K06643+K06246+K05099+K04570+K05055+K07203+K05725+K16340+K11584+K06482+K06252+K04456+K11583+K06481+K03099+K04399+K05057+K09048+K11217+K05084+K09408+K11584+K06493+K06630+K02580+K05130+K05131+K06625+K04361+K04688+K03456+K16197+K04371+K04451+K03259+K06484+K06487+K03914+K04735+K05719+K16332+K04368+K16197+K05071+K05717+K05453+K16857+K02582+K16172+K06237+K03099+K11584
Metabolism	Lipid metabolism	Steroid biosynthesis	8	19	0.0007031457	5.247868e-03	ko00100	ENSOARG00000001371(DHCR7);ENSOARG00000007493(DHCR24);ENSOARG00000008478(SQLE);ENSOARG00000015114(CYP24A1);ENSOARG00000016126(MSMO1);ENSOARG00000016678(SOAT1);ENSOARG00000016688(SOAT2);ENSOARG00000017477(CYP51A1)	K00213+K09828+K00511+K07436+K07750+K00637+K00637+K05917
Genetic Information Processing	Folding, sorting and degradation	Protein processing in endoplasmic reticulum	31	152	0.0009678051	7.051151e-03	ko04141	ENSOARG00000001078(-);ENSOARG00000001468(MAPK8);ENSOARG00000001565(SEC31A);ENSOARG00000001667(EIF2AK1);ENSOARG00000002779(EDEM3);ENSOARG00000003001(SEL1L);ENSOARG00000003944(TRAM1);ENSOARG00000005533(UBQLN2);ENSOARG00000005584(OS9);ENSOARG00000005787(WFS1);ENSOARG00000006405(UBE4B);ENSOARG00000006950(YOD1);ENSOARG00000007760(EDEM1);ENSOARG00000007968(SEC24C);ENSOARG00000008408(MAN1A1);ENSOARG0000…	K03173+K04440+K14005+K16194+K10086+K14026+K14010+K04523+K10088+K14020+K10597+K13719+K10084+K14007+K01230+K14006+K04523+K09054+K10601+K10661+K07151+K11718+K09503+K13999+K10950+K14015+K10636+K10575+K09508+K01230+K08860
Environmental Information Processing	Signal transduction	Hippo signaling pathway	34	174	0.001238005	8.809989e-03	ko04390	ENSOARG00000000103(-);ENSOARG00000000651(BMPR1A);ENSOARG00000001111(ID1);ENSOARG00000002885(CTNNB1);ENSOARG00000003455(CDH1);ENSOARG00000004175(FZD4);ENSOARG00000004543(-);ENSOARG00000004662(SMAD4);ENSOARG00000006660(YAP1);ENSOARG00000010971(TGFBR1);ENSOARG00000012237(-);ENSOARG00000012337(MOB1A);ENSOARG00000013781(PARD6B);ENSOARG00000014240(CCN2);ENSOARG00000014363(RASSF6);ENSOARG00000014463(WWC…	K04382+K04673+K04680+K02105+K05689+K02354+K16682+K04501+K16687+K04674+K06630+K06685+K06093+K06827+K09854+K16685+K03456+K04388+K16197+K03982+K08960+K02376+K05691+K04500+K16197+K21283+K06269+K04490+K16686+K16822+K05691+K05691+K05691+K05691
Cellular Processes	Cellular community - eukaryotes	Tight junction	31	157	0.001679959	1.168335e-02	ko04530	ENSOARG00000000103(-);ENSOARG00000000619(RAB8A);ENSOARG00000001411(PRKAB1);ENSOARG00000001468(MAPK8);ENSOARG00000002302(RAPGEF2);ENSOARG00000005050(MSN);ENSOARG00000005093(ARHGEF2);ENSOARG00000005551(OCLN);ENSOARG00000005791(ACTN4);ENSOARG00000007392(MAP3K1);ENSOARG00000007513(SYNPO);ENSOARG00000009280(F11R);ENSOARG00000010075(VASP);ENSOARG00000010602(CLDN6);ENSOARG00000011780(ACTR3);ENSOARG00000…	K04382+K07901+K07199+K04440+K08018+K05763+K12791+K06088+K05699+K04416+K21112+K06089+K06274+K06087+K18584+K06093+K10352+K04513+K03456+K17388+K05701+K05719+K05704+K05031+K20638+K10352+K07200+K17260+K06087+K05699+K08007
Human Diseases	Cancers	Thyroid cancer	11	36	0.001744433	1.183769e-02	ko05216	ENSOARG00000001845(TPM3);ENSOARG00000002417(-);ENSOARG00000002885(CTNNB1);ENSOARG00000003455(CDH1);ENSOARG00000013636(CDKN1A);ENSOARG00000015529(MAPK1);ENSOARG00000015571(TP53);ENSOARG00000016778(POLK);ENSOARG00000018109(-);ENSOARG00000018185(MAP2K1);ENSOARG00000020463(TCF7L1)	K09290+K09289+K02105+K05689+K06625+K04371+K04451+K03511+K09292+K04368+K04490
Metabolism	Carbohydrate metabolism	Citrate cycle (TCA cycle)	10	31	0.001779522	1.183769e-02	ko00020	ENSOARG00000001500(DLST);ENSOARG00000007136(DLD);ENSOARG00000008171(SUCLA2);ENSOARG00000009418(CS);ENSOARG00000010008(SDHC);ENSOARG00000010433(SUCLG2);ENSOARG00000014550(-);ENSOARG00000014707(ACO1);ENSOARG00000015712(-);ENSOARG00000017829(ACLY)	K00658+K00382+K01900+K01647+K00236+K01900+K00161+K01681+K00627+K01648
Environmental Information Processing	Signal transduction	TNF signaling pathway	22	100	0.001879471	1.223656e-02	ko04668	ENSOARG00000000123(-);ENSOARG00000000569(TNFAIP3);ENSOARG00000001078(-);ENSOARG00000001468(MAPK8);ENSOARG00000002578(TAB2);ENSOARG00000002612(MAP2K3);ENSOARG00000006526(AKT2);ENSOARG00000007592(PTGS2);ENSOARG00000009957(CREB3L2);ENSOARG00000012321(MAP3K7);ENSOARG00000012718(NFKB1);ENSOARG00000013096(IL18R1);ENSOARG00000014423(DAB2IP);ENSOARG00000015404(MAP2K4);ENSOARG00000015529(MAPK1);ENSOARG000…	K05508+K11859+K03173+K04440+K04404+K04432+K04456+K11987+K09048+K04427+K02580+K05173+K19901+K04430+K04371+K06490+K05141+K04735+K04368+K05453+K07763+K03158
Human Diseases	Infectious diseases	Toxoplasmosis	22	102	0.002451062	1.562552e-02	ko05145	ENSOARG00000000510(IFNGR1);ENSOARG00000000744(LAMC2);ENSOARG00000001031(MYD88);ENSOARG00000001262(BCL2L1);ENSOARG00000001468(MAPK8);ENSOARG00000002578(TAB2);ENSOARG00000002612(MAP2K3);ENSOARG00000005875(IRAK1);ENSOARG00000006526(AKT2);ENSOARG00000007625(IL10RA);ENSOARG00000009701(CASP9);ENSOARG00000010117(JAK1);ENSOARG00000010164(GNAI2);ENSOARG00000012321(MAP3K7);ENSOARG00000012718(NFKB1);ENSOARG…	K05132+K06246+K04729+K04570+K04440+K04404+K04432+K04730+K04456+K05134+K04399+K11217+K04630+K04427+K02580+K04371+K04630+K04735+K05719+K12473+K04630+K03158
Organismal Systems	Endocrine system	Relaxin signaling pathway	24	115	0.002539579	1.566964e-02	ko04926	ENSOARG00000001468(MAPK8);ENSOARG00000003199(SHC1);ENSOARG00000004790(MMP13);ENSOARG00000006526(AKT2);ENSOARG00000008423(SOS1);ENSOARG00000009957(CREB3L2);ENSOARG00000010164(GNAI2);ENSOARG00000010971(TGFBR1);ENSOARG00000011653(RXFP2);ENSOARG00000012718(NFKB1);ENSOARG00000013753(EGFR);ENSOARG00000014726(TGFBR2);ENSOARG00000015404(MAP2K4);ENSOARG00000015529(MAPK1);ENSOARG00000017199(ADCY7);ENSOARG0…	K04440+K06279+K07994+K04456+K03099+K09048+K04630+K04674+K04307+K02580+K04361+K04388+K04430+K04371+K08047+K04630+K04735+K05704+K04368+K04500+K08046+K04630+K06237+K03099
Organismal Systems	Endocrine system	Insulin signaling pathway	26	128	0.002560399	1.566964e-02	ko04910	ENSOARG00000000285(INSR);ENSOARG00000000454(PTPRF);ENSOARG00000000488(RPTOR);ENSOARG00000001411(PRKAB1);ENSOARG00000001468(MAPK8);ENSOARG00000002738(MTOR);ENSOARG00000003199(SHC1);ENSOARG00000004229(PKLR);ENSOARG00000004706(FLOT2);ENSOARG00000006517(PDE3B);ENSOARG00000006521(RAPGEF1);ENSOARG00000006526(AKT2);ENSOARG00000007168(PYGB);ENSOARG00000008423(SOS1);ENSOARG00000011448(SLC2A4);ENSOARG00000…	K04527+K05695+K07204+K07199+K04440+K07203+K06279+K12406+K07192+K13296+K06277+K04456+K00688+K03099+K07191+K04438+K04688+K04371+K03259+K04368+K22517+K07200+K06269+K16172+K03099+K00688
Human Diseases	Cancers	Small cell lung cancer	19	85	0.003091811	1.826288e-02	ko05222	ENSOARG00000000744(LAMC2);ENSOARG00000001078(-);ENSOARG00000001262(BCL2L1);ENSOARG00000003418(PTK2);ENSOARG00000005412(ITGA3);ENSOARG00000006526(AKT2);ENSOARG00000007592(PTGS2);ENSOARG00000008212(ITGA2);ENSOARG00000008246(RB1);ENSOARG00000009701(CASP9);ENSOARG00000012718(NFKB1);ENSOARG00000013636(CDKN1A);ENSOARG00000015571(TP53);ENSOARG00000016607(ITGAV);ENSOARG00000016778(POLK);ENSOARG0000001742…	K06246+K03173+K04570+K05725+K06482+K04456+K11987+K06481+K06618+K04399+K02580+K06625+K04451+K06487+K03511+K04735+K05719+K05717+K06237
Environmental Information Processing	Signal transduction	NF-kappa B signaling pathway	18	79	0.003156275	1.826288e-02	ko04064	ENSOARG00000000569(TNFAIP3);ENSOARG00000001031(MYD88);ENSOARG00000001078(-);ENSOARG00000001260(CSNK2A2);ENSOARG00000001262(BCL2L1);ENSOARG00000001700(PLCG1);ENSOARG00000002578(TAB2);ENSOARG00000005875(IRAK1);ENSOARG00000007592(PTGS2);ENSOARG00000008343(LTBR);ENSOARG00000012321(MAP3K7);ENSOARG00000012718(NFKB1);ENSOARG00000013144(IL1R1);ENSOARG00000014778(LYN);ENSOARG00000015656(ICAM1);ENSOARG0000…	K11859+K04729+K03173+K03097+K04570+K01116+K04404+K04730+K11987+K03159+K04427+K02580+K04386+K05854+K06490+K04735+K20912+K03158
Organismal Systems	Endocrine system	Thyroid hormone signaling pathway	22	104	0.003163179	1.826288e-02	ko04919	ENSOARG00000000570(-);ENSOARG00000001700(PLCG1);ENSOARG00000002484(CREBBP);ENSOARG00000002738(MTOR);ENSOARG00000002885(CTNNB1);ENSOARG00000003798(PLCE1);ENSOARG00000003836(SLC9A1);ENSOARG00000006526(AKT2);ENSOARG00000009701(CASP9);ENSOARG00000011074(MED1);ENSOARG00000011855(-);ENSOARG00000015529(MAPK1);ENSOARG00000015571(TP53);ENSOARG00000016238(MED12);ENSOARG00000016607(ITGAV);ENSOARG00000017940…	K06643+K01116+K04498+K07203+K02105+K05860+K05742+K04456+K04399+K15144+K06493+K04371+K04451+K15162+K06487+K05704+K04498+K09101+K04368+K20994+K07299+K08268
Human Diseases	Cancers	Prostate cancer	19	86	0.003552693	2.013193e-02	ko05215	ENSOARG00000000570(-);ENSOARG00000002484(CREBBP);ENSOARG00000002738(MTOR);ENSOARG00000002885(CTNNB1);ENSOARG00000006526(AKT2);ENSOARG00000008246(RB1);ENSOARG00000008423(SOS1);ENSOARG00000009701(CASP9);ENSOARG00000009957(CREB3L2);ENSOARG00000012718(NFKB1);ENSOARG00000013636(CDKN1A);ENSOARG00000013753(EGFR);ENSOARG00000015529(MAPK1);ENSOARG00000015571(TP53);ENSOARG00000017426(RELA);ENSOARG000000179…	K06643+K04498+K07203+K02105+K04456+K06618+K03099+K04399+K09048+K02580+K06625+K04361+K04371+K04451+K04735+K04498+K04368+K04490+K03099
Organismal Systems	Endocrine system	Adipocytokine signaling pathway	16	68	0.003736711	2.078970e-02	ko04920	ENSOARG00000001078(-);ENSOARG00000001411(PRKAB1);ENSOARG00000001468(MAPK8);ENSOARG00000002738(MTOR);ENSOARG00000006526(AKT2);ENSOARG00000007614(ACSL1);ENSOARG00000011448(SLC2A4);ENSOARG00000012718(NFKB1);ENSOARG00000017020(-);ENSOARG00000017123(-);ENSOARG00000017205(TNFRSF1B);ENSOARG00000017426(RELA);ENSOARG00000019034(PRKAG1);ENSOARG00000020471(SLC2A1);ENSOARG00000020473(IRS1);ENSOARG00000025177…	K03173+K07199+K04440+K07203+K04456+K01897+K07191+K02580+K06259+K06259+K05141+K04735+K07200+K07299+K16172+K03158
Organismal Systems	Endocrine system	Regulation of lipolysis in adipocyte	12	45	0.003906416	2.134577e-02	ko04923	ENSOARG00000000285(INSR);ENSOARG00000005578(MGLL);ENSOARG00000006517(PDE3B);ENSOARG00000006526(AKT2);ENSOARG00000007592(PTGS2);ENSOARG00000010164(GNAI2);ENSOARG00000014352(ADRB2);ENSOARG00000017199(ADCY7);ENSOARG00000017377(GNAI1);ENSOARG00000019182(ADCY6);ENSOARG00000019244(GNAI3);ENSOARG00000020473(IRS1)	K04527+K01054+K13296+K04456+K11987+K04630+K04142+K08047+K04630+K08046+K04630+K16172
Environmental Information Processing	Signal transduction	TGF-beta signaling pathway	17	75	0.004299074	2.307924e-02	ko04350	ENSOARG00000000103(-);ENSOARG00000000651(BMPR1A);ENSOARG00000001111(ID1);ENSOARG00000002484(CREBBP);ENSOARG00000004662(SMAD4);ENSOARG00000007733(ACVR1);ENSOARG00000010971(TGFBR1);ENSOARG00000013860(RHOA);ENSOARG00000014401(-);ENSOARG00000014624(PPP2R1B);ENSOARG00000014668(ZFYVE16);ENSOARG00000014726(TGFBR2);ENSOARG00000015529(MAPK1);ENSOARG00000017943(EP300);ENSOARG00000018276(SMAD3);ENSOARG00000…	K04382+K04673+K04680+K04498+K04501+K04675+K04674+K04513+K04688+K03456+K04679+K04388+K04371+K04498+K04500+K21283+K16857
Organismal Systems	Immune system	Fc gamma R-mediated phagocytosis	17	76	0.004961114	2.617415e-02	ko04666	ENSOARG00000001700(PLCG1);ENSOARG00000002720(VAV2);ENSOARG00000003416(WASF2);ENSOARG00000006340(GAB2);ENSOARG00000006526(AKT2);ENSOARG00000007578(SCIN);ENSOARG00000010075(VASP);ENSOARG00000011910(LIMK1);ENSOARG00000012278(CRK);ENSOARG00000012972(MYO10);ENSOARG00000014401(-);ENSOARG00000014778(LYN);ENSOARG00000014894(ASAP2);ENSOARG00000015529(MAPK1);ENSOARG00000015718(PTPRC);ENSOARG00000018185(MAP…	K01116+K05730+K05748+K08091+K04456+K05768+K06274+K05743+K04438+K12559+K04688+K05854+K12488+K04371+K06478+K04368+K00889
Organismal Systems	Endocrine system	Parathyroid hormone synthesis, secretion and action	20	95	0.005051688	2.620028e-02	ko04928	ENSOARG00000001159(MMP15);ENSOARG00000004790(MMP13);ENSOARG00000008132(ITPR1);ENSOARG00000009878(MEF2A);ENSOARG00000009957(CREB3L2);ENSOARG00000010164(GNAI2);ENSOARG00000010666(AKAP13);ENSOARG00000013636(CDKN1A);ENSOARG00000013753(EGFR);ENSOARG00000013860(RHOA);ENSOARG00000015114(CYP24A1);ENSOARG00000015354(-);ENSOARG00000015529(MAPK1);ENSOARG00000016470(EGR1);ENSOARG00000017199(ADCY7);ENSOARG000…	K07995+K07994+K04958+K09260+K09048+K04630+K16529+K06625+K04361+K04513+K07436+K03068+K04371+K09203+K08047+K04630+K04368+K08046+K04630+K07763
Human Diseases	Endocrine and metabolic diseases	Insulin resistance	21	102	0.005413875	2.759834e-02	ko04931	ENSOARG00000000285(INSR);ENSOARG00000000454(PTPRF);ENSOARG00000001411(PRKAB1);ENSOARG00000001468(MAPK8);ENSOARG00000002738(MTOR);ENSOARG00000006526(AKT2);ENSOARG00000007168(PYGB);ENSOARG00000009957(CREB3L2);ENSOARG00000011448(SLC2A4);ENSOARG00000012001(MLXIP);ENSOARG00000012718(NFKB1);ENSOARG00000014401(-);ENSOARG00000017020(-);ENSOARG00000017123(-);ENSOARG00000017426(RELA);ENSOARG00000019034(PRK…	K04527+K05695+K07199+K04440+K07203+K04456+K00688+K09048+K07191+K09113+K02580+K04688+K06259+K06259+K04735+K07200+K06269+K07299+K16172+K00688+K03158
Environmental Information Processing	Signal transduction	cAMP signaling pathway	33	183	0.005501629	2.759834e-02	ko04024	ENSOARG00000000935(-);ENSOARG00000001039(RAP1B);ENSOARG00000001468(MAPK8);ENSOARG00000001811(-);ENSOARG00000002484(CREBBP);ENSOARG00000002720(VAV2);ENSOARG00000003798(PLCE1);ENSOARG00000003836(SLC9A1);ENSOARG00000006517(PDE3B);ENSOARG00000006526(AKT2);ENSOARG00000007137(RRAS2);ENSOARG00000008578(PTCH1);ENSOARG00000009425(GRIA1);ENSOARG00000009957(CREB3L2);ENSOARG00000010164(GNAI2);ENSOARG00000012…	K05673+K07836+K04440+K12044+K04498+K05730+K05860+K05742+K13296+K04456+K07830+K06225+K05197+K09048+K04630+K02580+K04513+K04142+K06270+K04371+K17388+K03914+K08047+K04630+K06230+K04735+K04498+K05031+K04368+K04515+K08046+K04630+K06269
Human Diseases	Cancers	Glioma	15	65	0.005960395	2.941743e-02	ko05214	ENSOARG00000000570(-);ENSOARG00000001700(PLCG1);ENSOARG00000002738(MTOR);ENSOARG00000003199(SHC1);ENSOARG00000006526(AKT2);ENSOARG00000008246(RB1);ENSOARG00000008423(SOS1);ENSOARG00000013636(CDKN1A);ENSOARG00000013753(EGFR);ENSOARG00000015529(MAPK1);ENSOARG00000015571(TP53);ENSOARG00000016778(POLK);ENSOARG00000018185(MAP2K1);ENSOARG00000018416(-);ENSOARG00000020627(SOS2)	K06643+K01116+K07203+K06279+K04456+K06618+K03099+K06625+K04361+K04371+K04451+K03511+K04368+K04515+K03099
Human Diseases	Infectious diseases	Herpes simplex infection	29	157	0.006356893	3.087344e-02	ko05168	ENSOARG00000000510(IFNGR1);ENSOARG00000000590(-);ENSOARG00000000939(MAVS);ENSOARG00000001031(MYD88);ENSOARG00000001078(-);ENSOARG00000001260(CSNK2A2);ENSOARG00000001468(MAPK8);ENSOARG00000001667(EIF2AK1);ENSOARG00000002484(CREBBP);ENSOARG00000002578(TAB2);ENSOARG00000004233(PML);ENSOARG00000008057(TLR3);ENSOARG00000008935(HNRNPK);ENSOARG00000009154(STAT2);ENSOARG00000009345(UBE2R2);ENSOARG0000001…	K05132+K12886+K12648+K04729+K03173+K03097+K04440+K16194+K04498+K04404+K10054+K05401+K12886+K11221+K02207+K11217+K04427+K02580+K05130+K05131+K03006+K03129+K04451+K04735+K04498+K06269+K08860+K03158+K03994
Human Diseases	Cardiovascular diseases	Fluid shear stress and atherosclerosis	25	130	0.006457191	3.087344e-02	ko05418	ENSOARG00000000651(BMPR1A);ENSOARG00000001379(CAV2);ENSOARG00000001468(MAPK8);ENSOARG00000002683(SQSTM1);ENSOARG00000002885(CTNNB1);ENSOARG00000003418(PTK2);ENSOARG00000003601(NQO1);ENSOARG00000005093(ARHGEF2);ENSOARG00000006526(AKT2);ENSOARG00000007733(ACVR1);ENSOARG00000009878(MEF2A);ENSOARG00000011855(-);ENSOARG00000012321(MAP3K7);ENSOARG00000012718(NFKB1);ENSOARG00000012968(-);ENSOARG00000013…	K04673+K12958+K04440+K14381+K02105+K05725+K00355+K12791+K04456+K04675+K09260+K06493+K04427+K02580+K00799+K04386+K04513+K06471+K04430+K04451+K06490+K06487+K04735+K05704+K03158
Organismal Systems	Circulatory system	Adrenergic signaling in cardiomyocytes	24	124	0.006936216	3.191680e-02	ko04261	ENSOARG00000000103(-);ENSOARG00000000875(TPM4);ENSOARG00000001512(SCN5A);ENSOARG00000001811(-);ENSOARG00000001845(TPM3);ENSOARG00000003836(SLC9A1);ENSOARG00000004776(PPP2R5D);ENSOARG00000006526(AKT2);ENSOARG00000008030(PPP2R3A);ENSOARG00000009957(CREB3L2);ENSOARG00000010164(GNAI2);ENSOARG00000010759(PPP2R5A);ENSOARG00000014352(ADRB2);ENSOARG00000014624(PPP2R1B);ENSOARG00000015385(AGTR1);ENSOARG00…	K04382+K10375+K04838+K12044+K09290+K05742+K11584+K04456+K11583+K09048+K04630+K11584+K04142+K03456+K04166+K04371+K08047+K04630+K04515+K04864+K08046+K04630+K06269+K11584
Human Diseases	Endocrine and metabolic diseases	Cushing syndrome	24	124	0.006936216	3.191680e-02	ko04934	ENSOARG00000001039(RAP1B);ENSOARG00000002885(CTNNB1);ENSOARG00000004175(FZD4);ENSOARG00000008132(ITPR1);ENSOARG00000008246(RB1);ENSOARG00000009830(-);ENSOARG00000009957(CREB3L2);ENSOARG00000010164(GNAI2);ENSOARG00000013636(CDKN1A);ENSOARG00000013753(EGFR);ENSOARG00000015385(AGTR1);ENSOARG00000015529(MAPK1);ENSOARG00000016622(FZD6);ENSOARG00000017199(ADCY7);ENSOARG00000017377(GNAI1);ENSOARG0000001…	K07836+K02105+K02354+K04958+K06618+K09186+K09048+K04630+K06625+K04361+K04166+K04371+K02376+K08047+K04630+K12473+K04368+K04515+K09187+K08046+K04630+K04490+K11839+K04855
Environmental Information Processing	Signal transduction	Hippo signaling pathway - multiple species	8	26	0.006988319	3.191680e-02	ko04392	ENSOARG00000004543(-);ENSOARG00000006660(YAP1);ENSOARG00000012337(MOB1A);ENSOARG00000014363(RASSF6);ENSOARG00000014463(WWC1);ENSOARG00000015331(-);ENSOARG00000020654(SAV1);ENSOARG00000020699(FRMD6)	K16682+K16687+K06685+K09854+K16685+K08960+K16686+K16822
Metabolism	Glycan biosynthesis and metabolism	N-Glycan biosynthesis	11	43	0.007887156	3.549220e-02	ko00510	ENSOARG00000005002(-);ENSOARG00000006665(DPM3);ENSOARG00000008408(MAN1A1);ENSOARG00000009544(B4GALT1);ENSOARG00000011436(MGAT5);ENSOARG00000012575(MAN2A2);ENSOARG00000014854(STT3B);ENSOARG00000016716(MGAT1);ENSOARG00000018880(MAN2A1);ENSOARG00000020315(MAN1A2);ENSOARG00000020506(ST6GAL1)	K03842+K09659+K01230+K07966+K00744+K01231+K07151+K00726+K01231+K01230+K00778
Environmental Information Processing	Signal transduction	cGMP - PKG signaling pathway	26	140	0.008823173	3.872951e-02	ko04022	ENSOARG00000000285(INSR);ENSOARG00000006517(PDE3B);ENSOARG00000006526(AKT2);ENSOARG00000007989(GUCY1B1);ENSOARG00000008132(ITPR1);ENSOARG00000009163(KCNMA1);ENSOARG00000009878(MEF2A);ENSOARG00000009957(CREB3L2);ENSOARG00000010075(VASP);ENSOARG00000010164(GNAI2);ENSOARG00000013705(VDAC1);ENSOARG00000013860(RHOA);ENSOARG00000014352(ADRB2);ENSOARG00000015054(PPP1R12A);ENSOARG00000015385(AGTR1);ENSOA…	K04527+K13296+K04456+K12319+K04958+K04936+K09260+K09048+K06274+K04630+K05862+K04513+K04142+K06270+K04166+K04371+K17388+K05853+K08047+K04630+K04368+K08046+K04630+K06269+K00907+K16172
Human Diseases	Infectious diseases	Measles	22	113	0.008859691	3.872951e-02	ko05162	ENSOARG00000000510(IFNGR1);ENSOARG00000000569(TNFAIP3);ENSOARG00000000939(MAVS);ENSOARG00000001031(MYD88);ENSOARG00000001260(CSNK2A2);ENSOARG00000001667(EIF2AK1);ENSOARG00000002578(TAB2);ENSOARG00000002952(ADAR);ENSOARG00000005050(MSN);ENSOARG00000005875(IRAK1);ENSOARG00000006526(AKT2);ENSOARG00000009154(STAT2);ENSOARG00000010117(JAK1);ENSOARG00000012321(MAP3K7);ENSOARG00000012718(NFKB1);ENSOARG0…	K05132+K11859+K12648+K04729+K03097+K16194+K04404+K12968+K05763+K04730+K04456+K11221+K11217+K04427+K02580+K05130+K05131+K04007+K04451+K04735+K22517+K08860
Environmental Information Processing	Signal transduction	Phospholipase D signaling pathway	24	128	0.01030946	4.443232e-02	ko04072	ENSOARG00000000285(INSR);ENSOARG00000000536(AGPAT1);ENSOARG00000001700(PLCG1);ENSOARG00000002738(MTOR);ENSOARG00000003199(SHC1);ENSOARG00000003538(CYTH1);ENSOARG00000006340(GAB2);ENSOARG00000006511(ARF1);ENSOARG00000006526(AKT2);ENSOARG00000007137(RRAS2);ENSOARG00000008423(SOS1);ENSOARG00000010978(GAB1);ENSOARG00000012973(RALB);ENSOARG00000013753(EGFR);ENSOARG00000013860(RHOA);ENSOARG00000015385(…	K04527+K13509+K01116+K07203+K06279+K18441+K08091+K07937+K04456+K07830+K03099+K09593+K07835+K04361+K04513+K04166+K04371+K03914+K08047+K04368+K08046+K00901+K03099+K00889
Environmental Information Processing	Signal transduction	mTOR signaling pathway	24	130	0.01243696	5.285708e-02	ko04150	ENSOARG00000000285(INSR);ENSOARG00000000488(RPTOR);ENSOARG00000002034(FLCN);ENSOARG00000002738(MTOR);ENSOARG00000004175(FZD4);ENSOARG00000006526(AKT2);ENSOARG00000008423(SOS1);ENSOARG00000013499(ULK1);ENSOARG00000013860(RHOA);ENSOARG00000014401(-);ENSOARG00000015354(-);ENSOARG00000015529(MAPK1);ENSOARG00000015905(EIF4E);ENSOARG00000016187(FNIP1);ENSOARG00000016622(FZD6);ENSOARG00000016832(ATP6V1C…	K04527+K07204+K09594+K07203+K02354+K04456+K03099+K21357+K04513+K04688+K03068+K04371+K03259+K20400+K02376+K02148+K04368+K02145+K16186+K16172+K03099+K08272+K02149+K03158
Organismal Systems	Immune system	Chemokine signaling pathway	28	158	0.01267712	5.313971e-02	ko04062	ENSOARG00000000123(-);ENSOARG00000001039(RAP1B);ENSOARG00000002720(VAV2);ENSOARG00000003199(SHC1);ENSOARG00000003365(FGR);ENSOARG00000003418(PTK2);ENSOARG00000003585(ELMO1);ENSOARG00000005073(GRK6);ENSOARG00000006526(AKT2);ENSOARG00000008423(SOS1);ENSOARG00000009154(STAT2);ENSOARG00000010164(GNAI2);ENSOARG00000010741(FOXO3);ENSOARG00000011850(PXN);ENSOARG00000012278(CRK);ENSOARG00000012718(NFKB1)…	K05508+K07836+K05730+K06279+K08891+K05725+K12366+K08291+K04456+K03099+K11221+K04630+K09408+K05760+K04438+K02580+K04513+K05854+K04371+K17388+K08047+K04630+K04735+K05704+K04368+K08046+K04630+K03099
Human Diseases	Endocrine and metabolic diseases	AGE-RAGE signaling pathway in diabetic complications	19	97	0.01350105	5.527302e-02	ko04933	ENSOARG00000000636(DIAPH1);ENSOARG00000001468(MAPK8);ENSOARG00000001700(PLCG1);ENSOARG00000003798(PLCE1);ENSOARG00000004662(SMAD4);ENSOARG00000006526(AKT2);ENSOARG00000010971(TGFBR1);ENSOARG00000012718(NFKB1);ENSOARG00000014726(TGFBR2);ENSOARG00000015262(SERPINE1);ENSOARG00000015385(AGTR1);ENSOARG00000015529(MAPK1);ENSOARG00000015656(ICAM1);ENSOARG00000016470(EGR1);ENSOARG00000017426(RELA);ENSOAR…	K05740+K04440+K01116+K05860+K04501+K04456+K04674+K02580+K04388+K03982+K04166+K04371+K06490+K09203+K04735+K04500+K21421+K05717+K06237
Human Diseases	Cancers	Gastric cancer	30	173	0.01360472	5.527302e-02	ko05226	ENSOARG00000000778(MET);ENSOARG00000002738(MTOR);ENSOARG00000002885(CTNNB1);ENSOARG00000003199(SHC1);ENSOARG00000003455(CDH1);ENSOARG00000004175(FZD4);ENSOARG00000004662(SMAD4);ENSOARG00000006526(AKT2);ENSOARG00000008246(RB1);ENSOARG00000008423(SOS1);ENSOARG00000010971(TGFBR1);ENSOARG00000010978(GAB1);ENSOARG00000013636(CDKN1A);ENSOARG00000013753(EGFR);ENSOARG00000014401(-);ENSOARG00000014726(TGF…	K05099+K07203+K02105+K06279+K05689+K02354+K04501+K04456+K06618+K03099+K04674+K09593+K06625+K04361+K04688+K04388+K03068+K04371+K04451+K02376+K05691+K03511+K04368+K04500+K04490+K03099+K05691+K05691+K05691+K05691
Cellular Processes	Cell growth and death	Cellular senescence	25	138	0.01372794	5.527302e-02	ko04218	ENSOARG00000000570(-);ENSOARG00000002612(MAP2K3);ENSOARG00000002683(SQSTM1);ENSOARG00000002738(MTOR);ENSOARG00000006526(AKT2);ENSOARG00000007137(RRAS2);ENSOARG00000007254(MCU);ENSOARG00000008132(ITPR1);ENSOARG00000008246(RB1);ENSOARG00000010741(FOXO3);ENSOARG00000010971(TGFBR1);ENSOARG00000012718(NFKB1);ENSOARG00000013102(ETS1);ENSOARG00000013636(CDKN1A);ENSOARG00000013705(VDAC1);ENSOARG000000147…	K06643+K04432+K14381+K07203+K04456+K07830+K20858+K04958+K06618+K09408+K04674+K02580+K02678+K06625+K05862+K04388+K03982+K04371+K04451+K04735+K16332+K04368+K04500+K06269+K05868
Metabolism	Global and overview maps	Carbon metabolism	21	111	0.01430465	5.684705e-02	ko01200	ENSOARG00000000940(ALDH6A1);ENSOARG00000001500(DLST);ENSOARG00000004229(PKLR);ENSOARG00000004237(G6PD);ENSOARG00000007136(DLD);ENSOARG00000007496(ME1);ENSOARG00000008171(SUCLA2);ENSOARG00000008756(H6PD);ENSOARG00000009418(CS);ENSOARG00000010008(SDHC);ENSOARG00000010049(-);ENSOARG00000010433(SUCLG2);ENSOARG00000012354(PSAT1);ENSOARG00000013672(GLDC);ENSOARG00000014550(-);ENSOARG00000014707(ACO1);E…	K00140+K00658+K12406+K00036+K00382+K00029+K01900+K13937+K01647+K00236+K01834+K01900+K00831+K00281+K00161+K01681+K00627+K05605+K03781+K08074+K01807
Human Diseases	Cancers	Viral carcinogenesis	31	181	0.01454855	5.707508e-02	ko05203	ENSOARG00000000570(-);ENSOARG00000000590(-);ENSOARG00000001078(-);ENSOARG00000002484(CREBBP);ENSOARG00000002671(SNW1);ENSOARG00000005791(ACTN4);ENSOARG00000007578(SCIN);ENSOARG00000008246(RB1);ENSOARG00000008343(LTBR);ENSOARG00000008935(HNRNPK);ENSOARG00000009957(CREB3L2);ENSOARG00000010117(JAK1);ENSOARG00000011716(DDB1);ENSOARG00000011850(PXN);ENSOARG00000012237(-);ENSOARG00000012718(NFKB1);ENSO…	K06643+K12886+K03173+K04498+K06063+K05699+K05768+K06618+K03159+K12886+K09048+K11217+K10610+K05760+K06630+K02580+K11252+K06625+K04513+K05854+K16197+K04371+K04451+K04735+K11405+K16332+K05704+K04498+K16197+K11408+K05699
Environmental Information Processing	Signal transduction	MAPK signaling pathway	41	255	0.01581151	6.124458e-02	ko04010	ENSOARG00000000285(INSR);ENSOARG00000000778(MET);ENSOARG00000001031(MYD88);ENSOARG00000001039(RAP1B);ENSOARG00000001078(-);ENSOARG00000001468(MAPK8);ENSOARG00000002302(RAPGEF2);ENSOARG00000002578(TAB2);ENSOARG00000002612(MAP2K3);ENSOARG00000003372(FLNC);ENSOARG00000005875(IRAK1);ENSOARG00000006526(AKT2);ENSOARG00000007137(RRAS2);ENSOARG00000007392(MAP3K1);ENSOARG00000008423(SOS1);ENSOARG000000104…	K04527+K05099+K04729+K07836+K03173+K04440+K08018+K04404+K04432+K04437+K04730+K04456+K07830+K04416+K03099+K05084+K04460+K04674+K04438+K04427+K02580+K04437+K04386+K04361+K04388+K04430+K04371+K04451+K21946+K04735+K04368+K04864+K05453+K02582+K04410+K04723+K03099+K04459+K04457+K03158+K04855
Human Diseases	Cancers	Non-small cell lung cancer	13	60	0.01709373	6.538352e-02	ko05223	ENSOARG00000001700(PLCG1);ENSOARG00000006526(AKT2);ENSOARG00000008246(RB1);ENSOARG00000008423(SOS1);ENSOARG00000009701(CASP9);ENSOARG00000010741(FOXO3);ENSOARG00000013636(CDKN1A);ENSOARG00000013753(EGFR);ENSOARG00000015529(MAPK1);ENSOARG00000015571(TP53);ENSOARG00000016778(POLK);ENSOARG00000018185(MAP2K1);ENSOARG00000020627(SOS2)	K01116+K04456+K06618+K03099+K04399+K09408+K06625+K04361+K04371+K04451+K03511+K04368+K03099
Organismal Systems	Aging	Longevity regulating pathway - multiple species	12	54	0.01773994	6.701755e-02	ko04213	ENSOARG00000000285(INSR);ENSOARG00000000488(RPTOR);ENSOARG00000001411(PRKAB1);ENSOARG00000002738(MTOR);ENSOARG00000006526(AKT2);ENSOARG00000010741(FOXO3);ENSOARG00000014401(-);ENSOARG00000017199(ADCY7);ENSOARG00000018566(CAT);ENSOARG00000019034(PRKAG1);ENSOARG00000019182(ADCY6);ENSOARG00000020473(IRS1)	K04527+K07204+K07199+K07203+K04456+K09408+K04688+K08047+K03781+K07200+K08046+K16172
Human Diseases	Infectious diseases	Chagas disease (American trypanosomiasis)	19	101	0.02031662	7.581568e-02	ko05142	ENSOARG00000000103(-);ENSOARG00000000510(IFNGR1);ENSOARG00000001031(MYD88);ENSOARG00000001468(MAPK8);ENSOARG00000005875(IRAK1);ENSOARG00000006526(AKT2);ENSOARG00000010164(GNAI2);ENSOARG00000010971(TGFBR1);ENSOARG00000012718(NFKB1);ENSOARG00000014624(PPP2R1B);ENSOARG00000014726(TGFBR2);ENSOARG00000015262(SERPINE1);ENSOARG00000015404(MAP2K4);ENSOARG00000015529(MAPK1);ENSOARG00000017377(GNAI1);ENSOA…	K04382+K05132+K04729+K04440+K04730+K04456+K04630+K04674+K02580+K03456+K04388+K03982+K04430+K04371+K04630+K04735+K04500+K04630+K03158
Human Diseases	Infectious diseases	HTLV-I infection	35	215	0.02064399	7.610917e-02	ko05166	ENSOARG00000001262(BCL2L1);ENSOARG00000002484(CREBBP);ENSOARG00000002885(CTNNB1);ENSOARG00000004175(FZD4);ENSOARG00000004662(SMAD4);ENSOARG00000006255(-);ENSOARG00000006526(AKT2);ENSOARG00000007137(RRAS2);ENSOARG00000007392(MAP3K1);ENSOARG00000008246(RB1);ENSOARG00000008343(LTBR);ENSOARG00000009467(-);ENSOARG00000010117(JAK1);ENSOARG00000010971(TGFBR1);ENSOARG00000011863(TLN1);ENSOARG00000012718(…	K04570+K04498+K02105+K02354+K04501+K02326+K04456+K07830+K04416+K06618+K03159+K02180+K11217+K04674+K06271+K02580+K02678+K04386+K06625+K05862+K04388+K04430+K04451+K06490+K09203+K02376+K08047+K04735+K06724+K03358+K04498+K04500+K08046+K07299+K03158
Organismal Systems	Immune system	NOD-like receptor signaling pathway	25	143	0.02090304	7.614679e-02	ko04621	ENSOARG00000000569(TNFAIP3);ENSOARG00000000939(MAVS);ENSOARG00000001031(MYD88);ENSOARG00000001078(-);ENSOARG00000001262(BCL2L1);ENSOARG00000001468(MAPK8);ENSOARG00000002578(TAB2);ENSOARG00000004500(NAMPT);ENSOARG00000007254(MCU);ENSOARG00000008132(ITPR1);ENSOARG00000009154(STAT2);ENSOARG00000009262(CARD6);ENSOARG00000010117(JAK1);ENSOARG00000012321(MAP3K7);ENSOARG00000012718(NFKB1);ENSOARG0000001…	K11859+K12648+K04729+K03173+K04570+K04440+K04404+K03462+K20858+K04958+K11221+K12797+K11217+K04427+K02580+K05130+K05131+K05862+K04513+K01363+K20876+K04371+K04735+K21421+K08341
Organismal Systems	Immune system	Th17 cell differentiation	18	96	0.02423862	8.541034e-02	ko04659	ENSOARG00000000510(IFNGR1);ENSOARG00000001468(MAPK8);ENSOARG00000001700(PLCG1);ENSOARG00000002562(IL6R);ENSOARG00000002738(MTOR);ENSOARG00000004662(SMAD4);ENSOARG00000007588(STAT6);ENSOARG00000010117(JAK1);ENSOARG00000010971(TGFBR1);ENSOARG00000012718(NFKB1);ENSOARG00000013144(IL1R1);ENSOARG00000014726(TGFBR2);ENSOARG00000015529(MAPK1);ENSOARG00000017426(RELA);ENSOARG00000018276(SMAD3);ENSOARG000…	K05132+K04440+K01116+K05055+K07203+K04501+K11225+K11217+K04674+K02580+K04386+K04388+K04371+K04735+K04500+K05071+K04723+K08268
Cellular Processes	Cell growth and death	Oocyte meiosis	19	103	0.02459216	8.541034e-02	ko04114	ENSOARG00000000103(-);ENSOARG00000000736(PKMYT1);ENSOARG00000004776(PPP2R5D);ENSOARG00000008132(ITPR1);ENSOARG00000008716(-);ENSOARG00000010759(PPP2R5A);ENSOARG00000012237(-);ENSOARG00000014624(PPP2R1B);ENSOARG00000015184(YWHAQ);ENSOARG00000015529(MAPK1);ENSOARG00000017199(ADCY7);ENSOARG00000017916(-);ENSOARG00000018185(MAP2K1);ENSOARG00000018416(-);ENSOARG00000018661(YWHAZ);ENSOARG00000019182(AD…	K04382+K06633+K11584+K04958+K02602+K11584+K06630+K03456+K16197+K04371+K08047+K03358+K04368+K04515+K16197+K08046+K06269+K05868+K11584
Human Diseases	Cancers	Endometrial cancer	19	103	0.02459216	8.541034e-02	ko05213	ENSOARG00000002885(CTNNB1);ENSOARG00000003455(CDH1);ENSOARG00000006526(AKT2);ENSOARG00000008423(SOS1);ENSOARG00000009701(CASP9);ENSOARG00000010741(FOXO3);ENSOARG00000013636(CDKN1A);ENSOARG00000013753(EGFR);ENSOARG00000015529(MAPK1);ENSOARG00000015571(TP53);ENSOARG00000016676(CTNNA1);ENSOARG00000016778(POLK);ENSOARG00000018185(MAP2K1);ENSOARG00000020463(TCF7L1);ENSOARG00000020627(SOS2);MSTRG.10282…	K02105+K05689+K04456+K03099+K04399+K09408+K06625+K04361+K04371+K04451+K05691+K03511+K04368+K04490+K03099+K05691+K05691+K05691+K05691
Human Diseases	Cardiovascular diseases	Arrhythmogenic right ventricular cardiomyopathy (ARVC)	20	110	0.02481077	8.541034e-02	ko05412	ENSOARG00000002885(CTNNB1);ENSOARG00000005412(ITGA3);ENSOARG00000006399(DSG2);ENSOARG00000006798(DSC2);ENSOARG00000006907(CDH2);ENSOARG00000008212(ITGA2);ENSOARG00000011855(-);ENSOARG00000013645(DAG1);ENSOARG00000016181(ITGA5);ENSOARG00000016607(ITGAV);ENSOARG00000016676(CTNNA1);ENSOARG00000017552(DSP);ENSOARG00000017638(ITGB1);ENSOARG00000019143(CACNB3);ENSOARG00000019313(PKP2);ENSOARG0000002046…	K02105+K06482+K07597+K07601+K06736+K06481+K06493+K06265+K06484+K06487+K05691+K10381+K05719+K04864+K12642+K04490+K05691+K05691+K05691+K05691
Organismal Systems	Endocrine system	Oxytocin signaling pathway	23	131	0.02484157	8.541034e-02	ko04921	ENSOARG00000001411(PRKAB1);ENSOARG00000007592(PTGS2);ENSOARG00000007989(GUCY1B1);ENSOARG00000008132(ITPR1);ENSOARG00000010164(GNAI2);ENSOARG00000013305(CAMK1G);ENSOARG00000013636(CDKN1A);ENSOARG00000013753(EGFR);ENSOARG00000013860(RHOA);ENSOARG00000015054(PPP1R12A);ENSOARG00000015529(MAPK1);ENSOARG00000015898(ROCK2);ENSOARG00000017199(ADCY7);ENSOARG00000017377(GNAI1);ENSOARG00000017940(SRC);ENSOA…	K07199+K11987+K12319+K04958+K04630+K08794+K06625+K04361+K04513+K06270+K04371+K17388+K08047+K04630+K05704+K04368+K04515+K07200+K04864+K08046+K04630+K06269+K00907
Cellular Processes	Transport and catabolism	Lysosome	21	118	0.02715251	9.231853e-02	ko04142	ENSOARG00000000090(AP1M1);ENSOARG00000001383(M6PR);ENSOARG00000002285(GAA);ENSOARG00000003247(GNS);ENSOARG00000004068(AP1B1);ENSOARG00000004224(-);ENSOARG00000004632(IGF2R);ENSOARG00000006664(LITAF);ENSOARG00000006748(CTSO);ENSOARG00000006957(PSAP);ENSOARG00000007905(NPC1);ENSOARG00000008479(SUMF1);ENSOARG00000009444(-);ENSOARG00000010913(GGA3);ENSOARG00000011951(-);ENSOARG00000014450(AP3D1);ENSO…	K12393+K10089+K12316+K01137+K12392+K12387+K06564+K19363+K01374+K12382+K12385+K13444+K01136+K12404+K12399+K12396+K01363+K01217+K12404+K01135+K01074
Human Diseases	Cancers	Basal cell carcinoma	11	51	0.0279408	9.395478e-02	ko05217	ENSOARG00000002885(CTNNB1);ENSOARG00000004175(FZD4);ENSOARG00000004241(SMO);ENSOARG00000008578(PTCH1);ENSOARG00000013636(CDKN1A);ENSOARG00000015571(TP53);ENSOARG00000016622(FZD6);ENSOARG00000016778(POLK);ENSOARG00000017420(GLI3);ENSOARG00000018738(BMP2);ENSOARG00000020463(TCF7L1)	K02105+K02354+K06226+K06225+K06625+K04451+K02376+K03511+K06230+K21283+K04490
Human Diseases	Cancers	Acute myeloid leukemia	13	64	0.02831941	9.419282e-02	ko05221	ENSOARG00000002738(MTOR);ENSOARG00000004233(PML);ENSOARG00000006526(AKT2);ENSOARG00000008423(SOS1);ENSOARG00000011785(PPARD);ENSOARG00000012718(NFKB1);ENSOARG00000014401(-);ENSOARG00000015529(MAPK1);ENSOARG00000015628(DUSP6);ENSOARG00000017426(RELA);ENSOARG00000018185(MAP2K1);ENSOARG00000020463(TCF7L1);ENSOARG00000020627(SOS2)	K07203+K10054+K04456+K03099+K04504+K02580+K04688+K04371+K21946+K04735+K04368+K04490+K03099
Cellular Processes	Cellular community - eukaryotes	Gap junction	14	71	0.02965756	9.758294e-02	ko04540	ENSOARG00000007989(GUCY1B1);ENSOARG00000008132(ITPR1);ENSOARG00000008423(SOS1);ENSOARG00000010164(GNAI2);ENSOARG00000013753(EGFR);ENSOARG00000015529(MAPK1);ENSOARG00000016530(TJP1);ENSOARG00000017199(ADCY7);ENSOARG00000017377(GNAI1);ENSOARG00000017940(SRC);ENSOARG00000018185(MAP2K1);ENSOARG00000019182(ADCY6);ENSOARG00000019244(GNAI3);ENSOARG00000020627(SOS2)	K12319+K04958+K03099+K04630+K04361+K04371+K05701+K08047+K04630+K05704+K04368+K08046+K04630+K03099
Environmental Information Processing	Signaling molecules and interaction	ECM-receptor interaction	15	78	0.03065645	9.979653e-02	ko04512	ENSOARG00000000744(LAMC2);ENSOARG00000005412(ITGA3);ENSOARG00000005941(TNC);ENSOARG00000007039(-);ENSOARG00000008212(ITGA2);ENSOARG00000011855(-);ENSOARG00000013645(DAG1);ENSOARG00000016181(ITGA5);ENSOARG00000016607(ITGAV);ENSOARG00000017020(-);ENSOARG00000017123(-);ENSOARG00000017638(ITGB1);ENSOARG00000019329(FN1);ENSOARG00000020058(THBS1);ENSOARG00000020503(COL4A4)	K06246+K06482+K06252+K06254+K06481+K06493+K06265+K06484+K06487+K06259+K06259+K05719+K05717+K16857+K06237
Metabolism	Lipid metabolism	Biosynthesis of unsaturated fatty acids	6	22	0.03382658	1.089572e-01	ko01040	ENSOARG00000000948(HSD17B12);ENSOARG00000005352(-);ENSOARG00000013745(FADS1);ENSOARG00000013845(FADS2);ENSOARG00000014674(SCD);ENSOARG00000015388(ELOVL5)	K10251+K10258+K10224+K10226+K00507+K10244
Organismal Systems	Endocrine system	GnRH signaling pathway	16	86	0.03459283	1.091279e-01	ko04912	ENSOARG00000001468(MAPK8);ENSOARG00000002612(MAP2K3);ENSOARG00000007392(MAP3K1);ENSOARG00000008132(ITPR1);ENSOARG00000008423(SOS1);ENSOARG00000013753(EGFR);ENSOARG00000015404(MAP2K4);ENSOARG00000015529(MAPK1);ENSOARG00000016470(EGR1);ENSOARG00000017199(ADCY7);ENSOARG00000017940(SRC);ENSOARG00000018185(MAP2K1);ENSOARG00000018416(-);ENSOARG00000019182(ADCY6);ENSOARG00000019414(MMP14);ENSOARG0000002…	K04440+K04432+K04416+K04958+K03099+K04361+K04430+K04371+K09203+K08047+K05704+K04368+K04515+K08046+K07763+K03099
Organismal Systems	Endocrine system	Melanogenesis	16	86	0.03459283	1.091279e-01	ko04916	ENSOARG00000002484(CREBBP);ENSOARG00000002885(CTNNB1);ENSOARG00000004175(FZD4);ENSOARG00000009308(-);ENSOARG00000009957(CREB3L2);ENSOARG00000010164(GNAI2);ENSOARG00000015529(MAPK1);ENSOARG00000016622(FZD6);ENSOARG00000017199(ADCY7);ENSOARG00000017377(GNAI1);ENSOARG00000017943(EP300);ENSOARG00000018185(MAP2K1);ENSOARG00000018416(-);ENSOARG00000019182(ADCY6);ENSOARG00000019244(GNAI3);ENSOARG0000002…	K04498+K02105+K02354+K08725+K09048+K04630+K04371+K02376+K08047+K04630+K04498+K04368+K04515+K08046+K04630+K04490
Environmental Information Processing	Signal transduction	Jak-STAT signaling pathway	24	143	0.03612791	1.128076e-01	ko04630	ENSOARG00000000510(IFNGR1);ENSOARG00000001262(BCL2L1);ENSOARG00000002484(CREBBP);ENSOARG00000002562(IL6R);ENSOARG00000002738(MTOR);ENSOARG00000006526(AKT2);ENSOARG00000007588(STAT6);ENSOARG00000007625(IL10RA);ENSOARG00000008423(SOS1);ENSOARG00000009154(STAT2);ENSOARG00000009845(OSMR);ENSOARG00000009932(-);ENSOARG00000010117(JAK1);ENSOARG00000011645(STAM);ENSOARG00000013188(IFNAR1);ENSOARG00000013…	K05132+K04570+K04498+K05055+K07203+K04456+K11225+K05134+K03099+K11221+K05057+K05058+K11217+K04705+K05130+K05131+K06625+K04361+K00157+K04698+K05076+K04498+K05071+K03099
Metabolism	Amino acid metabolism	Phenylalanine metabolism	5	17	0.03798011	1.173931e-01	ko00360	ENSOARG00000003288(MAOB);ENSOARG00000009599(ALDH1A3);ENSOARG00000011261(-);ENSOARG00000014391(DDC);ENSOARG00000015870(PAH)	K00274+K00129+K00628+K01593+K00500
Human Diseases	Cancers	Central carbon metabolism in cancer	12	61	0.04284156	1.310952e-01	ko05230	ENSOARG00000000778(MET);ENSOARG00000002738(MTOR);ENSOARG00000004237(G6PD);ENSOARG00000006526(AKT2);ENSOARG00000010049(-);ENSOARG00000013753(EGFR);ENSOARG00000014550(-);ENSOARG00000015529(MAPK1);ENSOARG00000015571(TP53);ENSOARG00000018185(MAP2K1);ENSOARG00000020471(SLC2A1);ENSOARG00000021136(HIF1A)	K05099+K07203+K00036+K04456+K01834+K04361+K00161+K04371+K04451+K04368+K07299+K08268
Metabolism	Global and overview maps	Fatty acid metabolism	10	48	0.04363571	1.322032e-01	ko01212	ENSOARG00000000948(HSD17B12);ENSOARG00000005352(-);ENSOARG00000006198(CPT2);ENSOARG00000007614(ACSL1);ENSOARG00000013745(FADS1);ENSOARG00000013845(FADS2);ENSOARG00000014674(SCD);ENSOARG00000015388(ELOVL5);ENSOARG00000019178(ACADL);ENSOARG00000020179(PPT1)	K10251+K10258+K08766+K01897+K10224+K10226+K00507+K10244+K00255+K01074
Organismal Systems	Nervous system	Dopaminergic synapse	19	110	0.04503496	1.351049e-01	ko04728	ENSOARG00000000103(-);ENSOARG00000001468(MAPK8);ENSOARG00000003288(MAOB);ENSOARG00000003996(-);ENSOARG00000004776(PPP2R5D);ENSOARG00000006526(AKT2);ENSOARG00000008030(PPP2R3A);ENSOARG00000008132(ITPR1);ENSOARG00000009425(GRIA1);ENSOARG00000009957(CREB3L2);ENSOARG00000010164(GNAI2);ENSOARG00000010759(PPP2R5A);ENSOARG00000014391(DDC);ENSOARG00000014624(PPP2R1B);ENSOARG00000017377(GNAI1);ENSOARG0000…	K04382+K04440+K00274+K00545+K11584+K04456+K11583+K04958+K05197+K09048+K04630+K11584+K01593+K03456+K04630+K04515+K04630+K06269+K11584
Organismal Systems	Nervous system	Long-term depression	11	55	0.04608993	1.358903e-01	ko04730	ENSOARG00000000103(-);ENSOARG00000007989(GUCY1B1);ENSOARG00000008132(ITPR1);ENSOARG00000009425(GRIA1);ENSOARG00000010164(GNAI2);ENSOARG00000014624(PPP2R1B);ENSOARG00000014778(LYN);ENSOARG00000015529(MAPK1);ENSOARG00000017377(GNAI1);ENSOARG00000018185(MAP2K1);ENSOARG00000019244(GNAI3)	K04382+K12319+K04958+K05197+K04630+K03456+K05854+K04371+K04630+K04368+K04630
Human Diseases	Substance dependence	Cocaine addiction	9	42	0.04618493	1.358903e-01	ko05030	ENSOARG00000003288(MAOB);ENSOARG00000009957(CREB3L2);ENSOARG00000009983(FOSB);ENSOARG00000010164(GNAI2);ENSOARG00000012718(NFKB1);ENSOARG00000014391(DDC);ENSOARG00000017377(GNAI1);ENSOARG00000017426(RELA);ENSOARG00000019244(GNAI3)	K00274+K09048+K09029+K04630+K02580+K01593+K04630+K04735+K04630
Cellular Processes	Cell growth and death	Cell cycle	20	118	0.048069	1.400868e-01	ko04110	ENSOARG00000000570(-);ENSOARG00000000736(PKMYT1);ENSOARG00000001946(ORC5);ENSOARG00000002484(CREBBP);ENSOARG00000004662(SMAD4);ENSOARG00000007419(ABL1);ENSOARG00000008246(RB1);ENSOARG00000009467(-);ENSOARG00000010359(RAD21);ENSOARG00000012237(-);ENSOARG00000012355(WEE1);ENSOARG00000013636(CDKN1A);ENSOARG00000015184(YWHAQ);ENSOARG00000015571(TP53);ENSOARG00000017777(RBL2);ENSOARG00000017916(-);ENS…	K06643+K06633+K02607+K04498+K04501+K06619+K06618+K02180+K06670+K06630+K06632+K06625+K16197+K04451+K16332+K03358+K04498+K04500+K16197+K05868
Organismal Systems	Endocrine system	Progesterone-mediated oocyte maturation	15	83	0.04989355	1.440323e-01	ko04914	ENSOARG00000000736(PKMYT1);ENSOARG00000001468(MAPK8);ENSOARG00000003730(STK10);ENSOARG00000006517(PDE3B);ENSOARG00000006526(AKT2);ENSOARG00000008716(-);ENSOARG00000010164(GNAI2);ENSOARG00000015529(MAPK1);ENSOARG00000017199(ADCY7);ENSOARG00000017377(GNAI1);ENSOARG00000017916(-);ENSOARG00000018185(MAP2K1);ENSOARG00000019182(ADCY6);ENSOARG00000019244(GNAI3);ENSOARG00000021023(-)	K06633+K04440+K08837+K13296+K04456+K02602+K04630+K04371+K08047+K04630+K03358+K04368+K08046+K04630+K05868
Genetic Information Processing	Folding, sorting and degradation	Ubiquitin mediated proteolysis	20	120	0.05575796	1.594573e-01	ko04120	ENSOARG00000000117(-);ENSOARG00000000570(-);ENSOARG00000001259(UBE2Q2);ENSOARG00000001369(UBE2S);ENSOARG00000002800(UBE2Q1);ENSOARG00000003653(MGRN1);ENSOARG00000004233(PML);ENSOARG00000004338(RHOBTB1);ENSOARG00000006405(UBE4B);ENSOARG00000007377(UBE3C);ENSOARG00000007392(MAP3K1);ENSOARG00000009345(UBE2R2);ENSOARG00000010086(UBA3);ENSOARG00000010515(BIRC6);ENSOARG00000011716(DDB1);ENSOARG00000012…	K10614+K06643+K10582+K10583+K10582+K10604+K10054+K07868+K10597+K10589+K04416+K02207+K10686+K10586+K10610+K10601+K03870+K03358+K22517+K10575
Human Diseases	Infectious diseases	Leishmaniasis	12	64	0.05886537	1.667852e-01	ko05140	ENSOARG00000000510(IFNGR1);ENSOARG00000001031(MYD88);ENSOARG00000002578(TAB2);ENSOARG00000005875(IRAK1);ENSOARG00000007592(PTGS2);ENSOARG00000010117(JAK1);ENSOARG00000012321(MAP3K7);ENSOARG00000012718(NFKB1);ENSOARG00000015529(MAPK1);ENSOARG00000017426(RELA);ENSOARG00000017638(ITGB1);ENSOARG00000018943(CYBB)	K05132+K04729+K04404+K04730+K11987+K11217+K04427+K02580+K04371+K04735+K05719+K21421
Human Diseases	Infectious diseases	Malaria	9	44	0.05978714	1.678428e-01	ko05144	ENSOARG00000000778(MET);ENSOARG00000001031(MYD88);ENSOARG00000007332(LRP1);ENSOARG00000014779(PECAM1);ENSOARG00000015656(ICAM1);ENSOARG00000017020(-);ENSOARG00000017123(-);ENSOARG00000019174(-);ENSOARG00000020058(THBS1)	K05099+K04729+K04550+K06471+K06490+K06259+K06259+K13823+K16857
Organismal Systems	Immune system	Fc epsilon RI signaling pathway	12	65	0.06498998	1.772608e-01	ko04664	ENSOARG00000001468(MAPK8);ENSOARG00000001700(PLCG1);ENSOARG00000002612(MAP2K3);ENSOARG00000002720(VAV2);ENSOARG00000006340(GAB2);ENSOARG00000006526(AKT2);ENSOARG00000008423(SOS1);ENSOARG00000014778(LYN);ENSOARG00000015404(MAP2K4);ENSOARG00000015529(MAPK1);ENSOARG00000018185(MAP2K1);ENSOARG00000020627(SOS2)	K04440+K01116+K04432+K05730+K08091+K04456+K03099+K05854+K04430+K04371+K04368+K03099
Human Diseases	Infectious diseases	Pertussis	13	72	0.0653274	1.772608e-01	ko05133	ENSOARG00000001031(MYD88);ENSOARG00000001468(MAPK8);ENSOARG00000005875(IRAK1);ENSOARG00000010164(GNAI2);ENSOARG00000012718(NFKB1);ENSOARG00000013860(RHOA);ENSOARG00000015529(MAPK1);ENSOARG00000016181(ITGA5);ENSOARG00000017377(GNAI1);ENSOARG00000017426(RELA);ENSOARG00000017638(ITGB1);ENSOARG00000019244(GNAI3);MSTRG.12741(C5)	K04729+K04440+K04730+K04630+K02580+K04513+K04371+K06484+K04630+K04735+K05719+K04630+K03994
Human Diseases	Cardiovascular diseases	Hypertrophic cardiomyopathy (HCM)	13	72	0.0653274	1.772608e-01	ko05410	ENSOARG00000000875(TPM4);ENSOARG00000001411(PRKAB1);ENSOARG00000001811(-);ENSOARG00000001845(TPM3);ENSOARG00000005412(ITGA3);ENSOARG00000008212(ITGA2);ENSOARG00000011855(-);ENSOARG00000013645(DAG1);ENSOARG00000016181(ITGA5);ENSOARG00000016607(ITGAV);ENSOARG00000017638(ITGB1);ENSOARG00000019034(PRKAG1);ENSOARG00000019143(CACNB3)	K10375+K07199+K12044+K09290+K06482+K06481+K06493+K06265+K06484+K06487+K05719+K07200+K04864
Human Diseases	Endocrine and metabolic diseases	Non-alcoholic fatty liver disease (NAFLD)	22	137	0.06545906	1.772608e-01	ko04932	ENSOARG00000000019(COX2);ENSOARG00000000023(COX3);ENSOARG00000000035(CYTB);ENSOARG00000000285(INSR);ENSOARG00000001078(-);ENSOARG00000001411(PRKAB1);ENSOARG00000001468(MAPK8);ENSOARG00000002562(IL6R);ENSOARG00000004229(PKLR);ENSOARG00000005411(NDUFB7);ENSOARG00000006526(AKT2);ENSOARG00000010008(SDHC);ENSOARG00000012001(MLXIP);ENSOARG00000012718(NFKB1);ENSOARG00000013236(UQCRQ);ENSOARG00000017426(…	K02261+K02262+K00412+K04527+K03173+K07199+K04440+K05055+K12406+K03963+K04456+K00236+K09113+K02580+K00418+K04735+K07200+K16172+K08860+K03158+K02256+K02262
Metabolism	Glycan biosynthesis and metabolism	Mucin type O-glycan biosynthesis	6	26	0.07044161	1.890801e-01	ko00512	ENSOARG00000000900(GCNT3);ENSOARG00000003115(GALNT2);ENSOARG00000004843(C1GALT1);ENSOARG00000005371(ST3GAL1);ENSOARG00000005627(GALNT1);ENSOARG00000021182(GALNT16)	K09662+K00710+K00731+K00780+K00710+K00710
Environmental Information Processing	Signal transduction	Notch signaling pathway	8	39	0.07259797	1.931737e-01	ko04330	ENSOARG00000000357(NCOR2);ENSOARG00000000358(PSEN1);ENSOARG00000002484(CREBBP);ENSOARG00000002671(SNW1);ENSOARG00000015165(ADAM17);ENSOARG00000017943(EP300);ENSOARG00000020153(DTX3L);ENSOARG00000020442(NOTCH2)	K06065+K04505+K04498+K06063+K06059+K04498+K06058+K20994
Organismal Systems	Immune system	T cell receptor signaling pathway	16	95	0.07502417	1.962171e-01	ko04660	ENSOARG00000001700(PLCG1);ENSOARG00000002720(VAV2);ENSOARG00000006526(AKT2);ENSOARG00000007798(NCK1);ENSOARG00000008423(SOS1);ENSOARG00000012321(MAP3K7);ENSOARG00000012718(NFKB1);ENSOARG00000013860(RHOA);ENSOARG00000015529(MAPK1);ENSOARG00000015718(PTPRC);ENSOARG00000017000(TEC);ENSOARG00000017426(RELA);ENSOARG00000018185(MAP2K1);ENSOARG00000018775(CBLB);ENSOARG00000020358(PAK2);ENSOARG0000002062…	K01116+K05730+K04456+K07365+K03099+K04427+K02580+K04513+K04371+K06478+K07364+K04735+K04368+K22517+K04410+K03099
Human Diseases	Cancers	Choline metabolism in cancer	16	95	0.07502417	1.962171e-01	ko05231	ENSOARG00000001468(MAPK8);ENSOARG00000001700(PLCG1);ENSOARG00000002738(MTOR);ENSOARG00000003416(WASF2);ENSOARG00000006526(AKT2);ENSOARG00000007301(SLC44A1);ENSOARG00000008423(SOS1);ENSOARG00000013753(EGFR);ENSOARG00000014401(-);ENSOARG00000015529(MAPK1);ENSOARG00000016774(SLC44A2);ENSOARG00000018185(MAP2K1);ENSOARG00000019293(DGKD);ENSOARG00000020627(SOS2);ENSOARG00000020960(PIP5K1A);ENSOARG00000…	K04440+K01116+K07203+K05748+K04456+K06515+K03099+K04361+K04688+K04371+K15377+K04368+K00901+K03099+K00889+K08268
Organismal Systems	Immune system	Toll-like receptor signaling pathway	15	88	0.07627461	1.977969e-01	ko04620	ENSOARG00000001031(MYD88);ENSOARG00000001468(MAPK8);ENSOARG00000002578(TAB2);ENSOARG00000002612(MAP2K3);ENSOARG00000005875(IRAK1);ENSOARG00000006526(AKT2);ENSOARG00000008057(TLR3);ENSOARG00000012321(MAP3K7);ENSOARG00000012718(NFKB1);ENSOARG00000013188(IFNAR1);ENSOARG00000013309(IFNAR2);ENSOARG00000015404(MAP2K4);ENSOARG00000015529(MAPK1);ENSOARG00000017426(RELA);ENSOARG00000018185(MAP2K1)	K04729+K04440+K04404+K04432+K04730+K04456+K05401+K04427+K02580+K05130+K05131+K04430+K04371+K04735+K04368
Genetic Information Processing	Translation	mRNA surveillance pathway	14	81	0.07731579	1.980780e-01	ko03015	ENSOARG00000000103(-);ENSOARG00000001352(SMG7);ENSOARG00000004435(-);ENSOARG00000004776(PPP2R5D);ENSOARG00000006453(SRRM1);ENSOARG00000007088(GSPT1);ENSOARG00000008030(PPP2R3A);ENSOARG00000010759(PPP2R5A);ENSOARG00000010928(SMG1);ENSOARG00000013239(CASC3);ENSOARG00000014624(PPP2R1B);ENSOARG00000018056(-);ENSOARG00000019544(PPP1CB);ENSOARG00000021144(PPP2R5E)	K04382+K14409+K03265+K11584+K13171+K03267+K11583+K11584+K08873+K14323+K03456+K14325+K06269+K11584
Human Diseases	Cardiovascular diseases	Dilated cardiomyopathy (DCM)	13	74	0.07807521	1.980780e-01	ko05414	ENSOARG00000000875(TPM4);ENSOARG00000001811(-);ENSOARG00000001845(TPM3);ENSOARG00000005412(ITGA3);ENSOARG00000008212(ITGA2);ENSOARG00000011855(-);ENSOARG00000013645(DAG1);ENSOARG00000016181(ITGA5);ENSOARG00000016607(ITGAV);ENSOARG00000017199(ADCY7);ENSOARG00000017638(ITGB1);ENSOARG00000019143(CACNB3);ENSOARG00000019182(ADCY6)	K10375+K12044+K09290+K06482+K06481+K06493+K06265+K06484+K06487+K08047+K05719+K04864+K08046
Organismal Systems	Endocrine system	Renin secretion	11	60	0.07832496	1.980780e-01	ko04924	ENSOARG00000006517(PDE3B);ENSOARG00000007989(GUCY1B1);ENSOARG00000008132(ITPR1);ENSOARG00000009163(KCNMA1);ENSOARG00000010164(GNAI2);ENSOARG00000014352(ADRB2);ENSOARG00000015263(CTSB);ENSOARG00000015385(AGTR1);ENSOARG00000017377(GNAI1);ENSOARG00000019182(ADCY6);ENSOARG00000019244(GNAI3)	K13296+K12319+K04958+K04936+K04630+K04142+K01363+K04166+K04630+K08046+K04630
Metabolism	Global and overview maps	Metabolic pathways	150	1178	0.08260216	2.071825e-01	ko01100	ENSOARG00000000010(ND2);ENSOARG00000000019(COX2);ENSOARG00000000022(ATP6);ENSOARG00000000023(COX3);ENSOARG00000000025(ND3);ENSOARG00000000033(ND6);ENSOARG00000000035(CYTB);ENSOARG00000000536(AGPAT1);ENSOARG00000000900(GCNT3);ENSOARG00000000940(ALDH6A1);ENSOARG00000000948(HSD17B12);ENSOARG00000001371(DHCR7);ENSOARG00000001500(DLST);ENSOARG00000001700(PLCG1);ENSOARG00000001722(-);ENSOARG00000001884…	K03879+K02261+K02126+K02262+K03880+K03884+K00412+K13509+K09662+K00140+K10251+K00213+K00658+K01116+K02564+K18310+K12316+K13506+K13402+K00710+K03372+K01137+K00274+K07409+K07408+K05860+K00545+K22284+K12406+K00036+K03462+K00731+K03842+K10258+K00780+K03963+K01939+K01054+K00710+K11151+K08764+K00920+K02326+K01634+K12657+K00720+K09659+K13711+K00911+K00382+K00688+K00472+K09828+K00029+K11987+K01897+K00654+…
Human Diseases	Neurodegenerative diseases	Amyotrophic lateral sclerosis (ALS)	9	47	0.08456997	2.103936e-01	ko05014	ENSOARG00000001262(BCL2L1);ENSOARG00000002612(MAP2K3);ENSOARG00000009425(GRIA1);ENSOARG00000009701(CASP9);ENSOARG00000015571(TP53);ENSOARG00000017205(TNFRSF1B);ENSOARG00000018566(CAT);ENSOARG00000018857(SLC1A2);ENSOARG00000025177(TNFRSF1A)	K04570+K04432+K05197+K04399+K04451+K05141+K03781+K05613+K03158
Cellular Processes	Cell growth and death	Apoptosis	19	119	0.0863246	2.113226e-01	ko04210	ENSOARG00000001078(-);ENSOARG00000001262(BCL2L1);ENSOARG00000001468(MAPK8);ENSOARG00000006526(AKT2);ENSOARG00000006748(CTSO);ENSOARG00000008132(ITPR1);ENSOARG00000009701(CASP9);ENSOARG00000009772(-);ENSOARG00000011690(-);ENSOARG00000012718(NFKB1);ENSOARG00000014423(DAB2IP);ENSOARG00000015263(CTSB);ENSOARG00000015529(MAPK1);ENSOARG00000015571(TP53);ENSOARG00000017426(RELA);ENSOARG00000018185(MAP2K…	K03173+K04570+K04440+K04456+K01374+K04958+K04399+K06114+K10522+K02580+K19901+K01363+K04371+K04451+K04735+K04368+K02582+K08860+K03158
Environmental Information Processing	Signal transduction	Wnt signaling pathway	19	119	0.0863246	2.113226e-01	ko04310	ENSOARG00000000358(PSEN1);ENSOARG00000001260(CSNK2A2);ENSOARG00000001468(MAPK8);ENSOARG00000002484(CREBBP);ENSOARG00000002885(CTNNB1);ENSOARG00000004175(FZD4);ENSOARG00000004662(SMAD4);ENSOARG00000011785(PPARD);ENSOARG00000012321(MAP3K7);ENSOARG00000013860(RHOA);ENSOARG00000015331(-);ENSOARG00000015354(-);ENSOARG00000015571(TP53);ENSOARG00000015898(ROCK2);ENSOARG00000016622(FZD6);ENSOARG000000179…	K04505+K03097+K04440+K04498+K02105+K02354+K04501+K04504+K04427+K04513+K08960+K03068+K04451+K17388+K02376+K04498+K04515+K04494+K04490
Cellular Processes	Cell growth and death	p53 signaling pathway	11	62	0.09439888	2.290461e-01	ko04115	ENSOARG00000000570(-);ENSOARG00000000612(PERP);ENSOARG00000001262(BCL2L1);ENSOARG00000009701(CASP9);ENSOARG00000013636(CDKN1A);ENSOARG00000014048(CCNG1);ENSOARG00000015262(SERPINE1);ENSOARG00000015571(TP53);ENSOARG00000017048(PPM1D);ENSOARG00000020058(THBS1);ENSOARG00000021023(-)	K06643+K10136+K04570+K04399+K06625+K10145+K03982+K04451+K10147+K16857+K05868
Human Diseases	Cancers	Breast cancer	20	128	0.09506161	2.290461e-01	ko05224	ENSOARG00000002738(MTOR);ENSOARG00000002885(CTNNB1);ENSOARG00000003199(SHC1);ENSOARG00000004175(FZD4);ENSOARG00000006526(AKT2);ENSOARG00000008246(RB1);ENSOARG00000008423(SOS1);ENSOARG00000013636(CDKN1A);ENSOARG00000013753(EGFR);ENSOARG00000014401(-);ENSOARG00000015354(-);ENSOARG00000015529(MAPK1);ENSOARG00000015571(TP53);ENSOARG00000016622(FZD6);ENSOARG00000016778(POLK);ENSOARG00000018040(NCOA1);…	K07203+K02105+K06279+K02354+K04456+K06618+K03099+K06625+K04361+K04688+K03068+K04371+K04451+K02376+K03511+K09101+K04368+K20994+K04490+K03099
Organismal Systems	Immune system	C-type lectin receptor signaling pathway	15	91	0.09581658	2.290615e-01	ko04625	ENSOARG00000000570(-);ENSOARG00000001468(MAPK8);ENSOARG00000002619(CLEC4D);ENSOARG00000006526(AKT2);ENSOARG00000007137(RRAS2);ENSOARG00000007592(PTGS2);ENSOARG00000008132(ITPR1);ENSOARG00000009154(STAT2);ENSOARG00000012718(NFKB1);ENSOARG00000013860(RHOA);ENSOARG00000015529(MAPK1);ENSOARG00000017361(ARHGEF12);ENSOARG00000017426(RELA);ENSOARG00000017940(SRC);ENSOARG00000018775(CBLB)	K06643+K04440+K10058+K04456+K07830+K11987+K04958+K11221+K02580+K04513+K04371+K07532+K04735+K05704+K22517
Cellular Processes	Cell growth and death	Necroptosis	21	136	0.09774403	2.318579e-01	ko04217	ENSOARG00000000510(IFNGR1);ENSOARG00000000569(TNFAIP3);ENSOARG00000001078(-);ENSOARG00000001468(MAPK8);ENSOARG00000002683(SQSTM1);ENSOARG00000006303(VPS4B);ENSOARG00000007168(PYGB);ENSOARG00000007588(STAT6);ENSOARG00000008057(TLR3);ENSOARG00000009154(STAT2);ENSOARG00000010117(JAK1);ENSOARG00000010161(CHMP7);ENSOARG00000013188(IFNAR1);ENSOARG00000013309(IFNAR2);ENSOARG00000013705(VDAC1);ENSOARG000…	K05132+K11859+K03173+K04440+K14381+K12196+K00688+K11225+K05401+K11221+K11217+K15053+K05130+K05131+K05862+K12192+K04515+K01915+K21421+K00688+K03158
Organismal Systems	Endocrine system	Prolactin signaling pathway	12	71	0.1103405	2.597246e-01	ko04917	ENSOARG00000001468(MAPK8);ENSOARG00000003199(SHC1);ENSOARG00000006526(AKT2);ENSOARG00000008423(SOS1);ENSOARG00000010741(FOXO3);ENSOARG00000012718(NFKB1);ENSOARG00000015529(MAPK1);ENSOARG00000016171(SOCS5);ENSOARG00000017426(RELA);ENSOARG00000017940(SRC);ENSOARG00000018185(MAP2K1);ENSOARG00000020627(SOS2)	K04440+K06279+K04456+K03099+K09408+K02580+K04371+K04698+K04735+K05704+K04368+K03099
Metabolism	Metabolism of cofactors and vitamins	Retinol metabolism	9	50	0.1146725	2.678610e-01	ko00830	ENSOARG00000003346(CYP1A2);ENSOARG00000003423(CYP1A1);ENSOARG00000005790(RDH10);ENSOARG00000008165(HSD17B6);ENSOARG00000012705(ALDH1A1);ENSOARG00000016052(AOX1);ENSOARG00000019217(UGT1A1);ENSOARG00000020479(RETSAT);ENSOARG00000021172(RDH11)	K07409+K07408+K11151+K13369+K07249+K00157+K00699+K09516+K11152
Organismal Systems	Immune system	IL-17 signaling pathway	13	79	0.1164963	2.700596e-01	ko04657	ENSOARG00000000417(S100A9);ENSOARG00000000569(TNFAIP3);ENSOARG00000001078(-);ENSOARG00000001468(MAPK8);ENSOARG00000002578(TAB2);ENSOARG00000003168(ELAVL1);ENSOARG00000004790(MMP13);ENSOARG00000007592(PTGS2);ENSOARG00000009983(FOSB);ENSOARG00000012321(MAP3K7);ENSOARG00000012718(NFKB1);ENSOARG00000015529(MAPK1);ENSOARG00000017426(RELA)	K21128+K11859+K03173+K04440+K04404+K13088+K07994+K11987+K09029+K04427+K02580+K04371+K04735
Cellular Processes	Cellular community - eukaryotes	Signaling pathways regulating pluripotency of stem cells	18	117	0.1216111	2.713852e-01	ko04550	ENSOARG00000000651(BMPR1A);ENSOARG00000001111(ID1);ENSOARG00000001463(-);ENSOARG00000002885(CTNNB1);ENSOARG00000003391(PCGF6);ENSOARG00000004175(FZD4);ENSOARG00000004662(SMAD4);ENSOARG00000004929(-);ENSOARG00000005019(-);ENSOARG00000006526(AKT2);ENSOARG00000007733(ACVR1);ENSOARG00000009932(-);ENSOARG00000010117(JAK1);ENSOARG00000012666(JARID2);ENSOARG00000015529(MAPK1);ENSOARG00000016622(FZD6);EN…	K04673+K04680+K11459+K02105+K11470+K02354+K04501+K09222+K09222+K04456+K04675+K05058+K11217+K11478+K04371+K02376+K04368+K04500
Organismal Systems	Digestive system	Gastric acid secretion	11	65	0.1219535	2.713852e-01	ko04971	ENSOARG00000003836(SLC9A1);ENSOARG00000008132(ITPR1);ENSOARG00000010164(GNAI2);ENSOARG00000017199(ADCY7);ENSOARG00000017377(GNAI1);ENSOARG00000018133(CFTR);ENSOARG00000018416(-);ENSOARG00000019182(ADCY6);ENSOARG00000019244(GNAI3);ENSOARG00000020201(MYLK);MSTRG.4475(EZR)	K05742+K04958+K04630+K08047+K04630+K05031+K04515+K08046+K04630+K00907+K08007
Human Diseases	Cancers	Melanoma	11	65	0.1219535	2.713852e-01	ko05218	ENSOARG00000000570(-);ENSOARG00000000778(MET);ENSOARG00000003455(CDH1);ENSOARG00000006526(AKT2);ENSOARG00000008246(RB1);ENSOARG00000013636(CDKN1A);ENSOARG00000013753(EGFR);ENSOARG00000015529(MAPK1);ENSOARG00000015571(TP53);ENSOARG00000016778(POLK);ENSOARG00000018185(MAP2K1)	K06643+K05099+K05689+K04456+K06618+K06625+K04361+K04371+K04451+K03511+K04368
Metabolism	Carbohydrate metabolism	Glyoxylate and dicarboxylate metabolism	6	30	0.1232763	2.713852e-01	ko00630	ENSOARG00000007136(DLD);ENSOARG00000009418(CS);ENSOARG00000013672(GLDC);ENSOARG00000014707(ACO1);ENSOARG00000018566(CAT);ENSOARG00000018757(GLUL)	K00382+K01647+K00281+K01681+K03781+K01915
Metabolism	Carbohydrate metabolism	Propanoate metabolism	6	30	0.1232763	2.713852e-01	ko00640	ENSOARG00000000940(ALDH6A1);ENSOARG00000007136(DLD);ENSOARG00000007696(ECHDC1);ENSOARG00000008171(SUCLA2);ENSOARG00000010433(SUCLG2);ENSOARG00000016273(HIBCH)	K00140+K00382+K18426+K01900+K01900+K05605
Cellular Processes	Transport and catabolism	Autophagy - other eukaryotes	6	30	0.1232763	2.713852e-01	ko04136	ENSOARG00000000103(-);ENSOARG00000000488(RPTOR);ENSOARG00000002738(MTOR);ENSOARG00000003799(ATG13);ENSOARG00000016088(ATG2B);ENSOARG00000021009(GABARAPL1)	K04382+K07204+K07203+K08331+K17906+K08341
Cellular Processes	Cell growth and death	Apoptosis - multiple species	6	30	0.1232763	2.713852e-01	ko04215	ENSOARG00000001262(BCL2L1);ENSOARG00000001468(MAPK8);ENSOARG00000009701(CASP9);ENSOARG00000010515(BIRC6);ENSOARG00000011690(-);ENSOARG00000025177(TNFRSF1A)	K04570+K04440+K04399+K10586+K10522+K03158
Organismal Systems	Endocrine system	Glucagon signaling pathway	15	95	0.1263134	2.760850e-01	ko04922	ENSOARG00000001411(PRKAB1);ENSOARG00000002484(CREBBP);ENSOARG00000005886(PFKFB1);ENSOARG00000006517(PDE3B);ENSOARG00000006526(AKT2);ENSOARG00000007168(PYGB);ENSOARG00000008132(ITPR1);ENSOARG00000009957(CREB3L2);ENSOARG00000010049(-);ENSOARG00000014550(-);ENSOARG00000017943(EP300);ENSOARG00000018416(-);ENSOARG00000019034(PRKAG1);ENSOARG00000020471(SLC2A1);ENSOARG00000020686(PYGL)	K07199+K04498+K19028+K13296+K04456+K00688+K04958+K09048+K01834+K00161+K04498+K04515+K07200+K07299+K00688
Organismal Systems	Circulatory system	Cardiac muscle contraction	11	66	0.1320406	2.865562e-01	ko04260	ENSOARG00000000019(COX2);ENSOARG00000000023(COX3);ENSOARG00000000035(CYTB);ENSOARG00000000875(TPM4);ENSOARG00000001811(-);ENSOARG00000001845(TPM3);ENSOARG00000003836(SLC9A1);ENSOARG00000013236(UQCRQ);ENSOARG00000019143(CACNB3);MSTRG.13330(MT-CO1);MSTRG.29325(MT-CO3)	K02261+K02262+K00412+K10375+K12044+K09290+K05742+K00418+K04864+K02256+K02262
Metabolism	Amino acid metabolism	Lysine degradation	11	67	0.1425661	3.072199e-01	ko00310	ENSOARG00000001500(DLST);ENSOARG00000003316(EZH1);ENSOARG00000003774(KMT5A);ENSOARG00000004448(ASH1L);ENSOARG00000005193(KMT2C);ENSOARG00000005685(PLOD2);ENSOARG00000009830(-);ENSOARG00000013062(SETD7);ENSOARG00000016092(COLGALT1);ENSOARG00000018975(KMT2D);MSTRG.25265(--)	K00658+K17451+K11428+K06101+K09188+K13645+K09186+K11431+K11703+K09187+K11433
Metabolism	Glycan biosynthesis and metabolism	Glycosphingolipid biosynthesis - lacto and neolacto series	4	18	0.144763	3.097726e-01	ko00601	ENSOARG00000009544(B4GALT1);ENSOARG00000014441(GGTA2P);ENSOARG00000015705(B3GALT5);ENSOARG00000019548(B3GNT2)	K07966+K00743+K03877+K00741
Metabolism	Glycan biosynthesis and metabolism	Glycosaminoglycan biosynthesis - keratan sulfate	3	12	0.1521855	3.233942e-01	ko00533	ENSOARG00000005371(ST3GAL1);ENSOARG00000009544(B4GALT1);ENSOARG00000019548(B3GNT2)	K00780+K07966+K00741
Organismal Systems	Endocrine system	PPAR signaling pathway	11	68	0.15352	3.239801e-01	ko03320	ENSOARG00000006004(SCP2);ENSOARG00000006198(CPT2);ENSOARG00000007614(ACSL1);ENSOARG00000009808(APOA2);ENSOARG00000011785(PPARD);ENSOARG00000013845(FADS2);ENSOARG00000014199(PLIN2);ENSOARG00000014674(SCD);ENSOARG00000017020(-);ENSOARG00000017123(-);ENSOARG00000019178(ACADL)	K08764+K08766+K01897+K08758+K04504+K10226+K17284+K00507+K06259+K06259+K00255
Metabolism	Carbohydrate metabolism	Starch and sucrose metabolism	6	32	0.1553164	3.255262e-01	ko00500	ENSOARG00000002285(GAA);ENSOARG00000007168(PYGB);ENSOARG00000009837(PGM2);ENSOARG00000016844(GBE1);ENSOARG00000020061(UGP2);ENSOARG00000020686(PYGL)	K12316+K00688+K15779+K00700+K00963+K00688
Human Diseases	Neurodegenerative diseases	Alzheimer disease	22	153	0.1594238	3.318618e-01	ko05010	ENSOARG00000000019(COX2);ENSOARG00000000022(ATP6);ENSOARG00000000023(COX3);ENSOARG00000000035(CYTB);ENSOARG00000000321(IDE);ENSOARG00000000358(PSEN1);ENSOARG00000005411(NDUFB7);ENSOARG00000007332(LRP1);ENSOARG00000008132(ITPR1);ENSOARG00000009701(CASP9);ENSOARG00000010008(SDHC);ENSOARG00000010418(ATF6);ENSOARG00000013236(UQCRQ);ENSOARG00000015056(APP);ENSOARG00000015165(ADAM17);ENSOARG00000015529…	K02261+K02126+K02262+K00412+K01408+K04505+K03963+K04550+K04958+K04399+K00236+K09054+K00418+K04520+K06059+K04371+K05853+K08860+K06704+K03158+K02256+K02262
Environmental Information Processing	Signal transduction	VEGF signaling pathway	9	54	0.1627382	3.364722e-01	ko04370	ENSOARG00000001700(PLCG1);ENSOARG00000003418(PTK2);ENSOARG00000006526(AKT2);ENSOARG00000007592(PTGS2);ENSOARG00000009701(CASP9);ENSOARG00000011850(PXN);ENSOARG00000015529(MAPK1);ENSOARG00000017940(SRC);ENSOARG00000018185(MAP2K1)	K01116+K05725+K04456+K11987+K04399+K05760+K04371+K05704+K04368
Metabolism	Amino acid metabolism	Arginine and proline metabolism	8	47	0.1668919	3.397571e-01	ko00330	ENSOARG00000003288(MAOB);ENSOARG00000006313(ALDH18A1);ENSOARG00000007348(P4HA1);ENSOARG00000009683(P4HA3);ENSOARG00000010048(OAT);ENSOARG00000016253(-);ENSOARG00000021045(GATM);MSTRG.3407(OAT)	K00274+K12657+K00472+K00472+K00819+K00802+K00613+K00819
Metabolism	Glycan biosynthesis and metabolism	Other types of O-glycan biosynthesis	4	19	0.1676579	3.397571e-01	ko00514	ENSOARG00000009544(B4GALT1);ENSOARG00000016092(COLGALT1);ENSOARG00000019728(POGLUT1);ENSOARG00000020506(ST6GAL1)	K07966+K11703+K13667+K00778
Metabolism	Glycan biosynthesis and metabolism	Glycosaminoglycan degradation	4	19	0.1676579	3.397571e-01	ko00531	ENSOARG00000003247(GNS);ENSOARG00000009444(-);ENSOARG00000016268(-);ENSOARG00000017167(ARSB)	K01137+K01136+K01217+K01135
Cellular Processes	Transport and catabolism	Phagosome	19	131	0.1711796	3.446116e-01	ko04145	ENSOARG00000001383(M6PR);ENSOARG00000008212(ITGA2);ENSOARG00000009626(MSR1);ENSOARG00000010651(RAB5B);ENSOARG00000011855(-);ENSOARG00000014303(STX7);ENSOARG00000015811(EEA1);ENSOARG00000016181(ITGA5);ENSOARG00000016607(ITGAV);ENSOARG00000016832(ATP6V1C1);ENSOARG00000017020(-);ENSOARG00000017123(-);ENSOARG00000017638(ITGB1);ENSOARG00000018943(CYBB);ENSOARG00000019028(PIKFYVE);ENSOARG00000019488(AT…	K10089+K06481+K06558+K07888+K06493+K08488+K12478+K06484+K06487+K02148+K06259+K06259+K05719+K21421+K00921+K02145+K16857+K06503+K02149
Human Diseases	Endocrine and metabolic diseases	Type II diabetes mellitus	7	41	0.1864562	3.721461e-01	ko04930	ENSOARG00000000285(INSR);ENSOARG00000001468(MAPK8);ENSOARG00000002738(MTOR);ENSOARG00000004229(PKLR);ENSOARG00000011448(SLC2A4);ENSOARG00000015529(MAPK1);ENSOARG00000020473(IRS1)	K04527+K04440+K07203+K12406+K07191+K04371+K16172
Human Diseases	Neurodegenerative diseases	Parkinson disease	18	125	0.1872892	3.721461e-01	ko05012	ENSOARG00000000010(ND2);ENSOARG00000000019(COX2);ENSOARG00000000022(ATP6);ENSOARG00000000023(COX3);ENSOARG00000000025(ND3);ENSOARG00000000033(ND6);ENSOARG00000000035(CYTB);ENSOARG00000005411(NDUFB7);ENSOARG00000009701(CASP9);ENSOARG00000010008(SDHC);ENSOARG00000010164(GNAI2);ENSOARG00000013236(UQCRQ);ENSOARG00000013705(VDAC1);ENSOARG00000017377(GNAI1);ENSOARG00000019021(UBE2G1);ENSOARG00000019244…	K03879+K02261+K02126+K02262+K03880+K03884+K00412+K03963+K04399+K00236+K04630+K00418+K05862+K04630+K10575+K04630+K02256+K02262
Human Diseases	Neurodegenerative diseases	Huntington disease	25	181	0.1916476	3.783495e-01	ko05016	ENSOARG00000000019(COX2);ENSOARG00000000022(ATP6);ENSOARG00000000023(COX3);ENSOARG00000000035(CYTB);ENSOARG00000002484(CREBBP);ENSOARG00000004929(-);ENSOARG00000005019(-);ENSOARG00000005411(NDUFB7);ENSOARG00000006349(AP2B1);ENSOARG00000006613(-);ENSOARG00000007777(DCTN4);ENSOARG00000008132(ITPR1);ENSOARG00000009701(CASP9);ENSOARG00000009957(CREB3L2);ENSOARG00000010008(SDHC);ENSOARG00000013203(HIP…	K02261+K02126+K02262+K00412+K04498+K09222+K09222+K03963+K11825+K11826+K10426+K04958+K04399+K09048+K00236+K04559+K00418+K05862+K03006+K03129+K04451+K04498+K05625+K02256+K02262
Organismal Systems	Environmental adaptation	Thermogenesis	29	215	0.2054002	4.029004e-01	ko04714	ENSOARG00000000010(ND2);ENSOARG00000000019(COX2);ENSOARG00000000022(ATP6);ENSOARG00000000023(COX3);ENSOARG00000000025(ND3);ENSOARG00000000033(ND6);ENSOARG00000000035(CYTB);ENSOARG00000000488(RPTOR);ENSOARG00000001411(PRKAB1);ENSOARG00000002612(MAP2K3);ENSOARG00000002738(MTOR);ENSOARG00000004275(ARID1A);ENSOARG00000005411(NDUFB7);ENSOARG00000005578(MGLL);ENSOARG00000006198(CPT2);ENSOARG00000007614…	K03879+K02261+K02126+K02262+K03880+K03884+K00412+K07204+K07199+K04432+K07203+K11653+K03963+K01054+K08766+K01897+K03099+K09048+K00236+K00418+K11650+K04688+K08047+K07200+K08046+K03099+K02256+K02129+K02262
Human Diseases	Infectious diseases	Salmonella infection	11	73	0.21423	4.150390e-01	ko05132	ENSOARG00000000510(IFNGR1);ENSOARG00000001031(MYD88);ENSOARG00000001468(MAPK8);ENSOARG00000003372(FLNC);ENSOARG00000003416(WASF2);ENSOARG00000012718(NFKB1);ENSOARG00000012724(FLNB);ENSOARG00000015529(MAPK1);ENSOARG00000015898(ROCK2);ENSOARG00000016530(TJP1);ENSOARG00000017426(RELA)	K05132+K04729+K04440+K04437+K05748+K02580+K04437+K04371+K17388+K05701+K04735
Metabolism	Amino acid metabolism	Tyrosine metabolism	5	28	0.2143012	4.150390e-01	ko00350	ENSOARG00000003288(MAOB);ENSOARG00000003996(-);ENSOARG00000009599(ALDH1A3);ENSOARG00000014391(DDC);ENSOARG00000016052(AOX1)	K00274+K00545+K00129+K01593+K00157
Human Diseases	Infectious diseases	Pathogenic Escherichia coli infection	1	2	0.2170407	4.177010e-01	ko05130	MSTRG.4475(EZR)	K08007
Metabolism	Lipid metabolism	Sphingolipid metabolism	7	43	0.2203836	4.214836e-01	ko00600	ENSOARG00000006286(SGPL1);ENSOARG00000006584(UGCG);ENSOARG00000007870(SPTLC1);ENSOARG00000013961(SGMS1);ENSOARG00000015855(DEGS1);ENSOARG00000020883(CERS2);ENSOARG00000021145(SGPP1)	K01634+K00720+K00654+K04714+K04712+K04710+K04716
Organismal Systems	Circulatory system	Vascular smooth muscle contraction	15	105	0.2235275	4.248411e-01	ko04270	ENSOARG00000005544(PPP1R14A);ENSOARG00000007989(GUCY1B1);ENSOARG00000008132(ITPR1);ENSOARG00000009163(KCNMA1);ENSOARG00000013860(RHOA);ENSOARG00000015054(PPP1R12A);ENSOARG00000015385(AGTR1);ENSOARG00000015529(MAPK1);ENSOARG00000015898(ROCK2);ENSOARG00000017199(ADCY7);ENSOARG00000017361(ARHGEF12);ENSOARG00000018185(MAP2K1);ENSOARG00000019182(ADCY6);ENSOARG00000019544(PPP1CB);ENSOARG00000020201(MYL…	K12328+K12319+K04958+K04936+K04513+K06270+K04166+K04371+K17388+K08047+K07532+K04368+K08046+K06269+K00907
Metabolism	Metabolism of cofactors and vitamins	Vitamin B6 metabolism	2	8	0.2328895	4.390651e-01	ko00750	ENSOARG00000012354(PSAT1);ENSOARG00000016052(AOX1)	K00831+K00157
Organismal Systems	Nervous system	Long-term potentiation	9	59	0.2338811	4.390651e-01	ko04720	ENSOARG00000001039(RAP1B);ENSOARG00000002484(CREBBP);ENSOARG00000008132(ITPR1);ENSOARG00000009425(GRIA1);ENSOARG00000015529(MAPK1);ENSOARG00000017943(EP300);ENSOARG00000018185(MAP2K1);ENSOARG00000018416(-);ENSOARG00000019544(PPP1CB)	K07836+K04498+K04958+K05197+K04371+K04498+K04368+K04515+K06269
Genetic Information Processing	Translation	RNA transport	20	147	0.245018	4.571677e-01	ko03013	ENSOARG00000001883(NMD3);ENSOARG00000002200(NUP98);ENSOARG00000003638(EIF3J);ENSOARG00000005628(EIF5);ENSOARG00000006453(SRRM1);ENSOARG00000007125(-);ENSOARG00000008469(KPNB1);ENSOARG00000008977(NUP188);ENSOARG00000009673(FMR1);ENSOARG00000010243(EIF4G2);ENSOARG00000011514(NUP153);ENSOARG00000013057(-);ENSOARG00000013239(CASC3);ENSOARG00000014984(FXR2);ENSOARG00000015905(EIF4E);ENSOARG00000017959…	K07562+K14297+K03245+K03262+K13171+K05019+K14293+K14311+K15516+K03260+K14296+K14316+K14323+K15516+K03259+K14298+K14325+K14291+K03257+K13137
Organismal Systems	Nervous system	GABAergic synapse	11	76	0.2547786	4.688333e-01	ko04727	ENSOARG00000010164(GNAI2);ENSOARG00000017199(ADCY7);ENSOARG00000017377(GNAI1);ENSOARG00000017940(SRC);ENSOARG00000018757(GLUL);ENSOARG00000019182(ADCY6);ENSOARG00000019244(GNAI3);ENSOARG00000019480(SLC38A2);ENSOARG00000019508(SLC38A1);ENSOARG00000021009(GABARAPL1);ENSOARG00000021162(GPHN)	K04630+K08047+K04630+K05704+K01915+K08046+K04630+K14207+K14990+K08341+K15376
Environmental Information Processing	Signal transduction	Ras signaling pathway	27	205	0.2548431	4.688333e-01	ko04014	ENSOARG00000000285(INSR);ENSOARG00000000778(MET);ENSOARG00000001039(RAP1B);ENSOARG00000001262(BCL2L1);ENSOARG00000001468(MAPK8);ENSOARG00000001700(PLCG1);ENSOARG00000003199(SHC1);ENSOARG00000003798(PLCE1);ENSOARG00000006340(GAB2);ENSOARG00000006526(AKT2);ENSOARG00000007137(RRAS2);ENSOARG00000007419(ABL1);ENSOARG00000008423(SOS1);ENSOARG00000010651(RAB5B);ENSOARG00000010978(GAB1);ENSOARG0000001271…	K04527+K05099+K07836+K04570+K04440+K01116+K06279+K05860+K08091+K04456+K07830+K06619+K03099+K07888+K09593+K02580+K07835+K02678+K04361+K04513+K04371+K04735+K04368+K05453+K02582+K04410+K03099
Organismal Systems	Endocrine system	Estrogen signaling pathway	17	124	0.2571114	4.688333e-01	ko04915	ENSOARG00000003199(SHC1);ENSOARG00000006526(AKT2);ENSOARG00000008132(ITPR1);ENSOARG00000008423(SOS1);ENSOARG00000009957(CREB3L2);ENSOARG00000010164(GNAI2);ENSOARG00000012272(FKBP5);ENSOARG00000013753(EGFR);ENSOARG00000015529(MAPK1);ENSOARG00000017199(ADCY7);ENSOARG00000017377(GNAI1);ENSOARG00000017940(SRC);ENSOARG00000018040(NCOA1);ENSOARG00000018185(MAP2K1);ENSOARG00000019182(ADCY6);ENSOARG00000…	K06279+K04456+K04958+K03099+K09048+K04630+K09571+K04361+K04371+K08047+K04630+K05704+K09101+K04368+K08046+K04630+K03099
Metabolism	Metabolism of other amino acids	beta-Alanine metabolism	5	30	0.2589308	4.688333e-01	ko00410	ENSOARG00000000940(ALDH6A1);ENSOARG00000009599(ALDH1A3);ENSOARG00000016253(-);ENSOARG00000016273(HIBCH);ENSOARG00000017549(DPYD)	K00140+K00129+K00802+K05605+K00207
Organismal Systems	Environmental adaptation	Circadian rhythm	5	30	0.2589308	4.688333e-01	ko04710	ENSOARG00000001411(PRKAB1);ENSOARG00000007840(BHLHE40);ENSOARG00000015331(-);ENSOARG00000017816(CRY1);ENSOARG00000019034(PRKAG1)	K07199+K03729+K08960+K02295+K07200
Metabolism	Amino acid metabolism	Glycine, serine and threonine metabolism	6	39	0.2894018	5.178769e-01	ko00260	ENSOARG00000003288(MAOB);ENSOARG00000007136(DLD);ENSOARG00000010049(-);ENSOARG00000012354(PSAT1);ENSOARG00000013672(GLDC);ENSOARG00000021045(GATM)	K00274+K00382+K01834+K00831+K00281+K00613
Organismal Systems	Digestive system	Fat digestion and absorption	6	39	0.2894018	5.178769e-01	ko04975	ENSOARG00000000536(AGPAT1);ENSOARG00000007344(ABCA1);ENSOARG00000014738(MTTP);ENSOARG00000017020(-);ENSOARG00000017123(-);ENSOARG00000017402(APOB)	K13509+K05641+K14463+K06259+K06259+K14462
Metabolism	Amino acid metabolism	Valine, leucine and isoleucine degradation	7	47	0.2937415	5.195659e-01	ko00280	ENSOARG00000000940(ALDH6A1);ENSOARG00000007136(DLD);ENSOARG00000008682(HMGCS1);ENSOARG00000016052(AOX1);ENSOARG00000016273(HIBCH);ENSOARG00000017489(AACS);ENSOARG00000020219(IVD)	K00140+K00382+K01641+K00157+K05605+K01907+K00253
Metabolism	Carbohydrate metabolism	Amino sugar and nucleotide sugar metabolism	7	47	0.2937415	5.195659e-01	ko00520	ENSOARG00000001722(-);ENSOARG00000009837(PGM2);ENSOARG00000011594(GNE);ENSOARG00000011880(UGDH);ENSOARG00000019024(CYB5R3);ENSOARG00000020061(UGP2);ENSOARG00000020204(CMAS)	K02564+K15779+K12409+K00012+K00326+K00963+K21749
Organismal Systems	Environmental adaptation	Circadian entrainment	11	79	0.2977248	5.208924e-01	ko04713	ENSOARG00000007989(GUCY1B1);ENSOARG00000008132(ITPR1);ENSOARG00000009425(GRIA1);ENSOARG00000010164(GNAI2);ENSOARG00000015529(MAPK1);ENSOARG00000017199(ADCY7);ENSOARG00000017377(GNAI1);ENSOARG00000018416(-);ENSOARG00000019182(ADCY6);ENSOARG00000019244(GNAI3);MSTRG.17862(Cacna1h)	K12319+K04958+K05197+K04630+K04371+K08047+K04630+K04515+K08046+K04630+K04855
Metabolism	Carbohydrate metabolism	Inositol phosphate metabolism	10	71	0.297896	5.208924e-01	ko00562	ENSOARG00000000940(ALDH6A1);ENSOARG00000001700(PLCG1);ENSOARG00000003798(PLCE1);ENSOARG00000006044(PIP4K2C);ENSOARG00000006686(-);ENSOARG00000006947(ITPKC);ENSOARG00000011093(PI4K2A);ENSOARG00000013461(ITPK1);ENSOARG00000019028(PIKFYVE);ENSOARG00000020960(PIP5K1A)	K00140+K01116+K05860+K00920+K13711+K00911+K13711+K00913+K00921+K00889
Organismal Systems	Digestive system	Bile secretion	10	72	0.313468	5.450069e-01	ko04976	ENSOARG00000000935(-);ENSOARG00000003559(ABCC3);ENSOARG00000003836(SLC9A1);ENSOARG00000012378(SLC4A4);ENSOARG00000017199(ADCY7);ENSOARG00000017639(LDLR);ENSOARG00000018133(CFTR);ENSOARG00000019182(ADCY6);ENSOARG00000020471(SLC2A1);ENSOARG00000020858(AQP9)	K05673+K05667+K05742+K13575+K08047+K12473+K05031+K08046+K07299+K09877
Organismal Systems	Nervous system	Glutamatergic synapse	12	89	0.3253185	5.587022e-01	ko04724	ENSOARG00000008132(ITPR1);ENSOARG00000009425(GRIA1);ENSOARG00000010164(GNAI2);ENSOARG00000015529(MAPK1);ENSOARG00000017199(ADCY7);ENSOARG00000017377(GNAI1);ENSOARG00000018757(GLUL);ENSOARG00000018857(SLC1A2);ENSOARG00000019182(ADCY6);ENSOARG00000019244(GNAI3);ENSOARG00000019480(SLC38A2);ENSOARG00000019508(SLC38A1)	K04958+K05197+K04630+K04371+K08047+K04630+K01915+K05613+K08046+K04630+K14207+K14990
Environmental Information Processing	Signaling molecules and interaction	Cell adhesion molecules (CAMs)	17	130	0.3253397	5.587022e-01	ko04514	ENSOARG00000000454(PTPRF);ENSOARG00000002009(-);ENSOARG00000003455(CDH1);ENSOARG00000005551(OCLN);ENSOARG00000006907(CDH2);ENSOARG00000009176(PVR);ENSOARG00000009280(F11R);ENSOARG00000010602(CLDN6);ENSOARG00000014779(PECAM1);ENSOARG00000015656(ICAM1);ENSOARG00000015718(PTPRC);ENSOARG00000016607(ITGAV);ENSOARG00000017638(ITGB1);ENSOARG00000019175(NECTIN3);ENSOARG00000020234(-);ENSOARG00000020472(C…	K05695+K16337+K05689+K06088+K06736+K06539+K06089+K06087+K06471+K06490+K06478+K06487+K05719+K06592+K06492+K06087+K06797
Human Diseases	Cancers	Transcriptional misregulation in cancers	19	147	0.3307858	5.587022e-01	ko05202	ENSOARG00000000570(-);ENSOARG00000000778(MET);ENSOARG00000000890(TSPAN7);ENSOARG00000001262(BCL2L1);ENSOARG00000001463(-);ENSOARG00000003418(PTK2);ENSOARG00000004233(PML);ENSOARG00000006297(MLLT1);ENSOARG00000009830(-);ENSOARG00000010144(KLF3);ENSOARG00000011157(TFE3);ENSOARG00000012718(NFKB1);ENSOARG00000013636(CDKN1A);ENSOARG00000014726(TGFBR2);ENSOARG00000015571(TP53);ENSOARG00000015628(DUSP6)…	K06643+K05099+K06571+K04570+K11459+K05725+K10054+K15187+K09186+K15605+K09105+K02580+K06625+K04388+K04451+K21946+K03511+K04735+K08854
Metabolism	Amino acid metabolism	Tryptophan metabolism	6	41	0.3316582	5.587022e-01	ko00380	ENSOARG00000003288(MAOB);ENSOARG00000003346(CYP1A2);ENSOARG00000003423(CYP1A1);ENSOARG00000014391(DDC);ENSOARG00000016052(AOX1);ENSOARG00000018566(CAT)	K00274+K07409+K07408+K01593+K00157+K03781
Organismal Systems	Endocrine system	Ovarian Steroidogenesis	6	41	0.3316582	5.587022e-01	ko04913	ENSOARG00000000285(INSR);ENSOARG00000003423(CYP1A1);ENSOARG00000007592(PTGS2);ENSOARG00000017199(ADCY7);ENSOARG00000017639(LDLR);ENSOARG00000019182(ADCY6)	K04527+K07408+K11987+K08047+K12473+K08046
Cellular Processes	Cell growth and death	Ferroptosis	7	49	0.3323	5.587022e-01	ko04216	ENSOARG00000002417(-);ENSOARG00000007614(ACSL1);ENSOARG00000008456(TF);ENSOARG00000015571(TP53);ENSOARG00000016390(SLC40A1);ENSOARG00000018943(CYBB);ENSOARG00000020307(TFRC)	K09289+K01897+K14736+K04451+K14685+K21421+K06503
Human Diseases	Infectious diseases	Tuberculosis	20	157	0.3494733	5.820025e-01	ko05152	ENSOARG00000000510(IFNGR1);ENSOARG00000001031(MYD88);ENSOARG00000001468(MAPK8);ENSOARG00000002484(CREBBP);ENSOARG00000005875(IRAK1);ENSOARG00000006526(AKT2);ENSOARG00000007625(IL10RA);ENSOARG00000009701(CASP9);ENSOARG00000010117(JAK1);ENSOARG00000010651(RAB5B);ENSOARG00000012718(NFKB1);ENSOARG00000013860(RHOA);ENSOARG00000015529(MAPK1);ENSOARG00000015811(EEA1);ENSOARG00000017361(ARHGEF12);ENSOARG…	K05132+K04729+K04440+K04498+K04730+K04456+K05134+K04399+K11217+K07888+K02580+K04513+K04371+K12478+K07532+K04735+K05704+K04498+K04515+K03158
Organismal Systems	Immune system	RIG-I-like receptor signaling pathway	8	58	0.3499623	5.820025e-01	ko04622	ENSOARG00000000939(MAVS);ENSOARG00000001078(-);ENSOARG00000001468(MAPK8);ENSOARG00000007233(ISG15);ENSOARG00000007392(MAP3K1);ENSOARG00000012321(MAP3K7);ENSOARG00000012718(NFKB1);ENSOARG00000017426(RELA)	K12648+K03173+K04440+K12159+K04416+K04427+K02580+K04735
Human Diseases	Neurodegenerative diseases	Prion diseases	5	34	0.35312	5.840796e-01	ko05020	ENSOARG00000015529(MAPK1);ENSOARG00000016470(EGR1);ENSOARG00000018185(MAP2K1);MSTRG.12741(C5);MSTRG.19631(C8G)	K04371+K09203+K04368+K03994+K03999
Organismal Systems	Immune system	B cell receptor signaling pathway	9	67	0.3646853	5.999661e-01	ko04662	ENSOARG00000002720(VAV2);ENSOARG00000006526(AKT2);ENSOARG00000008423(SOS1);ENSOARG00000012718(NFKB1);ENSOARG00000014778(LYN);ENSOARG00000015529(MAPK1);ENSOARG00000017426(RELA);ENSOARG00000018185(MAP2K1);ENSOARG00000020627(SOS2)	K05730+K04456+K03099+K02580+K05854+K04371+K04735+K04368+K03099
Organismal Systems	Digestive system	Vitamin digestion and absorption	3	19	0.3768818	6.076131e-01	ko04977	ENSOARG00000010135(F5);ENSOARG00000011965(LMBRD1);ENSOARG00000017402(APOB)	K14610+K14617+K14462
Organismal Systems	Immune system	Complement and coagulation cascades	10	76	0.3772635	6.076131e-01	ko04610	ENSOARG00000013891(-);ENSOARG00000014081(SERPINF2);ENSOARG00000015262(SERPINE1);ENSOARG00000016534(TFPI);ENSOARG00000016918(F2RL2);ENSOARG00000016937(F2R);ENSOARG00000017273(PROS1);ENSOARG00000020498(MASP1);MSTRG.12741(C5);MSTRG.19631(C8G)	K04007+K03983+K03982+K03909+K04235+K03914+K03908+K03992+K03994+K03999
Metabolism	Carbohydrate metabolism	Pentose phosphate pathway	4	27	0.3783948	6.076131e-01	ko00030	ENSOARG00000004237(G6PD);ENSOARG00000008756(H6PD);ENSOARG00000009837(PGM2);ENSOARG00000020781(RPIA)	K00036+K13937+K15779+K01807
Metabolism	Lipid metabolism	Fatty acid elongation	4	27	0.3783948	6.076131e-01	ko00062	ENSOARG00000000948(HSD17B12);ENSOARG00000005352(-);ENSOARG00000015388(ELOVL5);ENSOARG00000020179(PPT1)	K10251+K10258+K10244+K01074
Environmental Information Processing	Signal transduction	Phosphatidylinositol signaling system	12	93	0.3832331	6.076131e-01	ko04070	ENSOARG00000001700(PLCG1);ENSOARG00000003798(PLCE1);ENSOARG00000006044(PIP4K2C);ENSOARG00000006686(-);ENSOARG00000006947(ITPKC);ENSOARG00000008132(ITPR1);ENSOARG00000011093(PI4K2A);ENSOARG00000013461(ITPK1);ENSOARG00000017292(CDS2);ENSOARG00000019028(PIKFYVE);ENSOARG00000019293(DGKD);ENSOARG00000020960(PIP5K1A)	K01116+K05860+K00920+K13711+K00911+K04958+K13711+K00913+K00981+K00921+K00901+K00889
Organismal Systems	Sensory system	Inflammatory mediator regulation of TRP channels	12	93	0.3832331	6.076131e-01	ko04750	ENSOARG00000001468(MAPK8);ENSOARG00000001700(PLCG1);ENSOARG00000002612(MAP2K3);ENSOARG00000008132(ITPR1);ENSOARG00000013144(IL1R1);ENSOARG00000017199(ADCY7);ENSOARG00000017940(SRC);ENSOARG00000018416(-);ENSOARG00000019182(ADCY6);ENSOARG00000019544(PPP1CB);ENSOARG00000020138(NGF);ENSOARG00000020462(IL1RAP)	K04440+K01116+K04432+K04958+K04386+K08047+K05704+K04515+K08046+K06269+K02582+K04723
Human Diseases	Infectious diseases	Amoebiasis	12	93	0.3832331	6.076131e-01	ko05146	ENSOARG00000000744(LAMC2);ENSOARG00000003418(PTK2);ENSOARG00000005791(ACTN4);ENSOARG00000008576(VCL);ENSOARG00000010651(RAB5B);ENSOARG00000012718(NFKB1);ENSOARG00000013144(IL1R1);ENSOARG00000017426(RELA);ENSOARG00000019329(FN1);ENSOARG00000020503(COL4A4);ENSOARG00000021179(ACTN1);MSTRG.19631(C8G)	K06246+K05725+K05699+K05700+K07888+K02580+K04386+K04735+K05717+K06237+K05699+K03999
Metabolism	Biosynthesis of other secondary metabolites	Caffeine metabolism	1	4	0.3870228	6.104586e-01	ko00232	ENSOARG00000003346(CYP1A2)	K07409
Organismal Systems	Endocrine system	Cortisol synthesis and secretion	7	52	0.391251	6.139631e-01	ko04927	ENSOARG00000008132(ITPR1);ENSOARG00000009957(CREB3L2);ENSOARG00000015385(AGTR1);ENSOARG00000017199(ADCY7);ENSOARG00000017639(LDLR);ENSOARG00000019182(ADCY6);MSTRG.17862(Cacna1h)	K04958+K09048+K04166+K08047+K12473+K08046+K04855
Organismal Systems	Immune system	Th1 and Th2 cell differentiation	10	77	0.3934434	6.142535e-01	ko04658	ENSOARG00000000510(IFNGR1);ENSOARG00000001468(MAPK8);ENSOARG00000001700(PLCG1);ENSOARG00000007588(STAT6);ENSOARG00000010117(JAK1);ENSOARG00000012718(NFKB1);ENSOARG00000015529(MAPK1);ENSOARG00000017426(RELA);ENSOARG00000018832(IL4R);ENSOARG00000020442(NOTCH2)	K05132+K04440+K01116+K11225+K11217+K02580+K04371+K04735+K05071+K20994
Metabolism	Global and overview maps	Biosynthesis of amino acids	9	69	0.3989478	6.196854e-01	ko01230	ENSOARG00000004229(PKLR);ENSOARG00000006313(ALDH18A1);ENSOARG00000009418(CS);ENSOARG00000010049(-);ENSOARG00000012354(PSAT1);ENSOARG00000014707(ACO1);ENSOARG00000015870(PAH);ENSOARG00000018757(GLUL);ENSOARG00000020781(RPIA)	K12406+K12657+K01647+K01834+K00831+K01681+K00500+K01915+K01807
Metabolism	Energy metabolism	Oxidative phosphorylation	16	128	0.4028836	6.206214e-01	ko00190	ENSOARG00000000010(ND2);ENSOARG00000000019(COX2);ENSOARG00000000022(ATP6);ENSOARG00000000023(COX3);ENSOARG00000000025(ND3);ENSOARG00000000033(ND6);ENSOARG00000000035(CYTB);ENSOARG00000005411(NDUFB7);ENSOARG00000010008(SDHC);ENSOARG00000013236(UQCRQ);ENSOARG00000016832(ATP6V1C1);ENSOARG00000019488(ATP6V1A);ENSOARG00000021165(ATP6V1D);MSTRG.13330(MT-CO1);MSTRG.26076(ATP5ME);MSTRG.29325(MT-CO3)	K03879+K02261+K02126+K02262+K03880+K03884+K00412+K03963+K00236+K00418+K02148+K02145+K02149+K02256+K02129+K02262
Organismal Systems	Digestive system	Pancreatic secretion	11	86	0.4036067	6.206214e-01	ko04972	ENSOARG00000000619(RAB8A);ENSOARG00000001039(RAP1B);ENSOARG00000003836(SLC9A1);ENSOARG00000008132(ITPR1);ENSOARG00000009163(KCNMA1);ENSOARG00000012378(SLC4A4);ENSOARG00000013860(RHOA);ENSOARG00000016226(ATP2A2);ENSOARG00000017199(ADCY7);ENSOARG00000018133(CFTR);ENSOARG00000019182(ADCY6)	K07901+K07836+K05742+K04958+K04936+K13575+K04513+K05853+K08047+K05031+K08046
Human Diseases	Drug resistance	Platinum drug resistance	9	70	0.4161237	6.366693e-01	ko01524	ENSOARG00000000570(-);ENSOARG00000001262(BCL2L1);ENSOARG00000006345(SLC31A1);ENSOARG00000006526(AKT2);ENSOARG00000009701(CASP9);ENSOARG00000012968(-);ENSOARG00000013636(CDKN1A);ENSOARG00000015529(MAPK1);ENSOARG00000015571(TP53)	K06643+K04570+K14686+K04456+K04399+K00799+K06625+K04371+K04451
Metabolism	Carbohydrate metabolism	Glycolysis / Gluconeogenesis	8	62	0.4230911	6.441088e-01	ko00010	ENSOARG00000004229(PKLR);ENSOARG00000007136(DLD);ENSOARG00000009599(ALDH1A3);ENSOARG00000009837(PGM2);ENSOARG00000010049(-);ENSOARG00000014550(-);ENSOARG00000015712(-);ENSOARG00000018976(ADPGK)	K12406+K00382+K00129+K15779+K01834+K00161+K00627+K08074
Environmental Information Processing	Signal transduction	Calcium signaling pathway	19	156	0.4336785	6.548558e-01	ko04020	ENSOARG00000001632(STIM1);ENSOARG00000001700(PLCG1);ENSOARG00000003798(PLCE1);ENSOARG00000006947(ITPKC);ENSOARG00000007254(MCU);ENSOARG00000008132(ITPR1);ENSOARG00000008918(STIM2);ENSOARG00000010448(ERBB3);ENSOARG00000013705(VDAC1);ENSOARG00000013753(EGFR);ENSOARG00000014352(ADRB2);ENSOARG00000015385(AGTR1);ENSOARG00000016226(ATP2A2);ENSOARG00000016937(F2R);ENSOARG00000017199(ADCY7);ENSOARG000000…	K16059+K01116+K05860+K00911+K20858+K04958+K18196+K05084+K05862+K04361+K04142+K04166+K05853+K03914+K08047+K04515+K04279+K00907+K04855
Organismal Systems	Immune system	Hematopoietic cell lineage	11	88	0.4344305	6.548558e-01	ko04640	ENSOARG00000002562(IL6R);ENSOARG00000005412(ITGA3);ENSOARG00000008212(ITGA2);ENSOARG00000011855(-);ENSOARG00000013144(IL1R1);ENSOARG00000016181(ITGA5);ENSOARG00000017020(-);ENSOARG00000017123(-);ENSOARG00000018832(IL4R);ENSOARG00000019349(CSF1);ENSOARG00000020307(TFRC)	K05055+K06482+K06481+K06493+K04386+K06484+K06259+K06259+K05071+K05453+K06503
Metabolism	Lipid metabolism	Steroid hormone biosynthesis	6	46	0.4390818	6.586227e-01	ko00140	ENSOARG00000000948(HSD17B12);ENSOARG00000003346(CYP1A2);ENSOARG00000003423(CYP1A1);ENSOARG00000003996(-);ENSOARG00000008165(HSD17B6);ENSOARG00000019217(UGT1A1)	K10251+K07409+K07408+K00545+K13369+K00699
Metabolism	Carbohydrate metabolism	Pentose and glucuronate interconversions	3	21	0.4416862	6.592974e-01	ko00040	ENSOARG00000011880(UGDH);ENSOARG00000019217(UGT1A1);ENSOARG00000020061(UGP2)	K00012+K00699+K00963
Metabolism	Glycan biosynthesis and metabolism	Glycosphingolipid biosynthesis - globo and isoglobo series	2	13	0.4513868	6.705066e-01	ko00603	ENSOARG00000005371(ST3GAL1);ENSOARG00000015705(B3GALT5)	K00780+K03877
Metabolism	Carbohydrate metabolism	Galactose metabolism	4	30	0.4596083	6.740069e-01	ko00052	ENSOARG00000002285(GAA);ENSOARG00000009544(B4GALT1);ENSOARG00000009837(PGM2);ENSOARG00000020061(UGP2)	K12316+K07966+K15779+K00963
Metabolism	Metabolism of cofactors and vitamins	Nicotinate and nicotinamide metabolism	4	30	0.4596083	6.740069e-01	ko00760	ENSOARG00000004500(NAMPT);ENSOARG00000013284(NT5E);ENSOARG00000016052(AOX1);ENSOARG00000018705(NUDT12)	K03462+K19970+K00157+K03426
Human Diseases	Cardiovascular diseases	Viral myocarditis	6	47	0.4603511	6.740069e-01	ko05416	ENSOARG00000007419(ABL1);ENSOARG00000009701(CASP9);ENSOARG00000010243(EIF4G2);ENSOARG00000013645(DAG1);ENSOARG00000015656(ICAM1);ENSOARG00000015844(-)	K06619+K04399+K03260+K06265+K06490+K06788
Metabolism	Carbohydrate metabolism	Pyruvate metabolism	5	39	0.4719719	6.844711e-01	ko00620	ENSOARG00000004229(PKLR);ENSOARG00000007136(DLD);ENSOARG00000007496(ME1);ENSOARG00000014550(-);ENSOARG00000015712(-)	K12406+K00382+K00029+K00161+K00627
Organismal Systems	Excretory system	Vasopressin-regulated water reabsorption	5	39	0.4719719	6.844711e-01	ko04962	ENSOARG00000007777(DCTN4);ENSOARG00000009957(CREB3L2);ENSOARG00000010651(RAB5B);ENSOARG00000017281(DCTN5);ENSOARG00000019182(ADCY6)	K10426+K09048+K07888+K10427+K08046
Human Diseases	Substance dependence	Alcoholism	16	134	0.4787378	6.910083e-01	ko05034	ENSOARG00000003199(SHC1);ENSOARG00000003288(MAOB);ENSOARG00000008423(SOS1);ENSOARG00000009957(CREB3L2);ENSOARG00000009983(FOSB);ENSOARG00000010164(GNAI2);ENSOARG00000013149(HIST2H2BE);ENSOARG00000014391(DDC);ENSOARG00000015529(MAPK1);ENSOARG00000017377(GNAI1);ENSOARG00000017776(-);ENSOARG00000018185(MAP2K1);ENSOARG00000019244(GNAI3);ENSOARG00000019375(HDAC7);ENSOARG00000019544(PPP1CB);ENSOARG0000…	K06279+K00274+K03099+K09048+K09029+K04630+K11252+K01593+K04371+K04630+K11405+K04368+K04630+K11408+K06269+K03099
Genetic Information Processing	Folding, sorting and degradation	RNA degradation	9	74	0.4843807	6.958709e-01	ko03018	ENSOARG00000001003(CNOT6);ENSOARG00000001574(BTG2);ENSOARG00000007574(PARN);ENSOARG00000008803(CNOT4);ENSOARG00000011455(DDX6);ENSOARG00000016760(BTG1);ENSOARG00000017158(TTC37);ENSOARG00000017771(CNOT6L);ENSOARG00000025175(TOB2)	K12603+K14443+K01148+K10643+K12614+K14443+K12600+K12603+K14443
Metabolism	Lipid metabolism	Glycerolipid metabolism	7	57	0.4890782	6.990213e-01	ko00561	ENSOARG00000000536(AGPAT1);ENSOARG00000001430(PLPP5);ENSOARG00000003059(GPAT3);ENSOARG00000004007(LIPG);ENSOARG00000005578(MGLL);ENSOARG00000013726(AGK);ENSOARG00000019293(DGKD)	K13509+K18693+K13506+K22284+K01054+K09881+K00901
Metabolism	Glycan biosynthesis and metabolism	Glycosphingolipid biosynthesis - ganglio series	2	14	0.4911424	6.990213e-01	ko00604	ENSOARG00000003192(-);ENSOARG00000005371(ST3GAL1)	K03372+K00780
Human Diseases	Substance dependence	Amphetamine addiction	7	58	0.5081725	7.165935e-01	ko05031	ENSOARG00000003288(MAOB);ENSOARG00000009425(GRIA1);ENSOARG00000009957(CREB3L2);ENSOARG00000009983(FOSB);ENSOARG00000014391(DDC);ENSOARG00000018416(-);ENSOARG00000019544(PPP1CB)	K00274+K05197+K09048+K09029+K01593+K04515+K06269
Human Diseases	Immune diseases	Inflammatiory bowel disease (IBD)	7	58	0.5081725	7.165935e-01	ko05321	ENSOARG00000000510(IFNGR1);ENSOARG00000007588(STAT6);ENSOARG00000012718(NFKB1);ENSOARG00000013096(IL18R1);ENSOARG00000017426(RELA);ENSOARG00000018276(SMAD3);ENSOARG00000018832(IL4R)	K05132+K11225+K02580+K05173+K04735+K04500+K05071
Organismal Systems	Immune system	Natural killer cell mediated cytotoxicity	11	93	0.5106937	7.168453e-01	ko04650	ENSOARG00000000510(IFNGR1);ENSOARG00000001700(PLCG1);ENSOARG00000002720(VAV2);ENSOARG00000003199(SHC1);ENSOARG00000008423(SOS1);ENSOARG00000013188(IFNAR1);ENSOARG00000013309(IFNAR2);ENSOARG00000015529(MAPK1);ENSOARG00000015656(ICAM1);ENSOARG00000018185(MAP2K1);ENSOARG00000020627(SOS2)	K05132+K01116+K05730+K06279+K03099+K05130+K05131+K04371+K06490+K04368+K03099
Metabolism	Amino acid metabolism	Phenylalanine, tyrosine and tryptophan biosynthesis	1	6	0.5201391	7.205128e-01	ko00400	ENSOARG00000015870(PAH)	K00500
Metabolism	Metabolism of other amino acids	Phosphonate and phosphinate metabolism	1	6	0.5201391	7.205128e-01	ko00440	ENSOARG00000018771(SELENOI)	K00993
Metabolism	Xenobiotics biodegradation and metabolism	Drug metabolism - cytochrome P450	6	50	0.522725	7.205128e-01	ko00982	ENSOARG00000003288(MAOB);ENSOARG00000003346(CYP1A2);ENSOARG00000009599(ALDH1A3);ENSOARG00000012968(-);ENSOARG00000016052(AOX1);ENSOARG00000019217(UGT1A1)	K00274+K07409+K00129+K00799+K00157+K00699
Environmental Information Processing	Membrane transport	ABC transporters	6	50	0.522725	7.205128e-01	ko02010	ENSOARG00000000935(-);ENSOARG00000002397(ABCB8);ENSOARG00000003559(ABCC3);ENSOARG00000007344(ABCA1);ENSOARG00000016359(-);ENSOARG00000018133(CFTR)	K05673+K05655+K05667+K05641+K05670+K05031
Organismal Systems	Nervous system	Cholinergic synapse	11	94	0.5256418	7.212843e-01	ko04725	ENSOARG00000006526(AKT2);ENSOARG00000008132(ITPR1);ENSOARG00000009957(CREB3L2);ENSOARG00000010164(GNAI2);ENSOARG00000015529(MAPK1);ENSOARG00000017199(ADCY7);ENSOARG00000017377(GNAI1);ENSOARG00000018185(MAP2K1);ENSOARG00000018416(-);ENSOARG00000019182(ADCY6);ENSOARG00000019244(GNAI3)	K04456+K04958+K09048+K04630+K04371+K08047+K04630+K04368+K04515+K08046+K04630
Metabolism	Global and overview maps	2-Oxocarboxylic acid metabolism	2	15	0.529029	7.221463e-01	ko01210	ENSOARG00000009418(CS);ENSOARG00000014707(ACO1)	K01647+K01681
Organismal Systems	Endocrine system	Renin-angiotensin system	3	24	0.5333499	7.221463e-01	ko04614	ENSOARG00000011331(PREP);ENSOARG00000015385(AGTR1);ENSOARG00000017994(LNPEP)	K01322+K04166+K01257
Organismal Systems	Excretory system	Collecting duct acid secretion	3	24	0.5333499	7.221463e-01	ko04966	ENSOARG00000016832(ATP6V1C1);ENSOARG00000019488(ATP6V1A);ENSOARG00000021165(ATP6V1D)	K02148+K02145+K02149
Organismal Systems	Nervous system	Retrograde endocannabinoid signaling	15	130	0.5381606	7.254500e-01	ko04723	ENSOARG00000000010(ND2);ENSOARG00000000025(ND3);ENSOARG00000000033(ND6);ENSOARG00000001468(MAPK8);ENSOARG00000005411(NDUFB7);ENSOARG00000005578(MGLL);ENSOARG00000007592(PTGS2);ENSOARG00000008132(ITPR1);ENSOARG00000009425(GRIA1);ENSOARG00000010164(GNAI2);ENSOARG00000015529(MAPK1);ENSOARG00000017199(ADCY7);ENSOARG00000017377(GNAI1);ENSOARG00000019182(ADCY6);ENSOARG00000019244(GNAI3)	K03879+K03880+K03884+K04440+K03963+K01054+K11987+K04958+K05197+K04630+K04371+K08047+K04630+K08046+K04630
Organismal Systems	Digestive system	Mineral absorption	5	44	0.5829953	7.818880e-01	ko04978	ENSOARG00000006345(SLC31A1);ENSOARG00000008456(TF);ENSOARG00000009047(-);ENSOARG00000016390(SLC40A1);ENSOARG00000018341(-)	K14686+K14736+K14737+K14685+K14739
Human Diseases	Drug resistance	Antifolate resistance	4	35	0.5851384	7.818880e-01	ko01523	ENSOARG00000000935(-);ENSOARG00000003559(ABCC3);ENSOARG00000012718(NFKB1);ENSOARG00000017426(RELA)	K05673+K05667+K02580+K04735
Organismal Systems	Endocrine system	Aldosterone synthesis and secretion	9	81	0.5978774	7.954369e-01	ko04925	ENSOARG00000008132(ITPR1);ENSOARG00000009957(CREB3L2);ENSOARG00000013305(CAMK1G);ENSOARG00000015385(AGTR1);ENSOARG00000017199(ADCY7);ENSOARG00000017639(LDLR);ENSOARG00000018416(-);ENSOARG00000019182(ADCY6);MSTRG.17862(Cacna1h)	K04958+K09048+K08794+K04166+K08047+K12473+K04515+K08046+K04855
Metabolism	Carbohydrate metabolism	Ascorbate and aldarate metabolism	2	18	0.63073	8.319111e-01	ko00053	ENSOARG00000011880(UGDH);ENSOARG00000019217(UGT1A1)	K00012+K00699
Human Diseases	Endocrine and metabolic diseases	Maturity onset diabetes of the young	2	18	0.63073	8.319111e-01	ko04950	ENSOARG00000003928(HNF4A);ENSOARG00000004229(PKLR)	K07292+K12406
Metabolism	Glycan biosynthesis and metabolism	Mannose type O-glycan biosyntheis	2	19	0.6605946	8.584442e-01	ko00515	ENSOARG00000009544(B4GALT1);ENSOARG00000018279(LARGE1)	K07966+K09668
Metabolism	Glycan biosynthesis and metabolism	Glycosaminoglycan biosynthesis - heparan sulfate / heparin	2	19	0.6605946	8.584442e-01	ko00534	ENSOARG00000014991(EXTL3);ENSOARG00000018604(GLCE)	K02370+K01793
Metabolism	Metabolism of terpenoids and polyketides	Terpenoid backbone biosynthesis	2	19	0.6605946	8.584442e-01	ko00900	ENSOARG00000008682(HMGCS1);ENSOARG00000020218(ZMPSTE24)	K01641+K06013
Organismal Systems	Nervous system	Serotonergic synapse	10	95	0.6674231	8.584442e-01	ko04726	ENSOARG00000003288(MAOB);ENSOARG00000007592(PTGS2);ENSOARG00000008132(ITPR1);ENSOARG00000010164(GNAI2);ENSOARG00000014391(DDC);ENSOARG00000015056(APP);ENSOARG00000015529(MAPK1);ENSOARG00000017377(GNAI1);ENSOARG00000018185(MAP2K1);ENSOARG00000019244(GNAI3)	K00274+K11987+K04958+K04630+K01593+K04520+K04371+K04630+K04368+K04630
Metabolism	Lipid metabolism	Synthesis and degradation of ketone bodies	1	9	0.6676788	8.584442e-01	ko00072	ENSOARG00000008682(HMGCS1)	K01641
Metabolism	Metabolism of cofactors and vitamins	Ubiquinone and other terpenoid-quinone biosynthesis	1	9	0.6676788	8.584442e-01	ko00130	ENSOARG00000003601(NQO1)	K00355
Genetic Information Processing	Folding, sorting and degradation	SNARE interactions in vesicular transport	3	30	0.6879674	8.778217e-01	ko04130	ENSOARG00000003768(VAMP7);ENSOARG00000014303(STX7);ENSOARG00000020535(SNAP23)	K08515+K08488+K08508
Genetic Information Processing	Folding, sorting and degradation	Protein export	2	20	0.6884876	8.778217e-01	ko03060	ENSOARG00000008242(SRP68);ENSOARG00000019429(OXA1L)	K03107+K03217
Human Diseases	Infectious diseases	African trypanosomiasis	3	31	0.7096156	8.996988e-01	ko05143	ENSOARG00000001031(MYD88);ENSOARG00000015656(ICAM1);ENSOARG00000019174(-)	K04729+K06490+K13823
Metabolism	Amino acid metabolism	Histidine metabolism	2	21	0.7144667	8.996988e-01	ko00340	ENSOARG00000003288(MAOB);ENSOARG00000009599(ALDH1A3)	K00274+K00129
Metabolism	Metabolism of cofactors and vitamins	Folate biosynthesis	2	21	0.7144667	8.996988e-01	ko00790	ENSOARG00000015870(PAH);ENSOARG00000021162(GPHN)	K00500+K15376
Metabolism	Amino acid metabolism	Alanine, aspartate and glutamate metabolism	3	32	0.7300903	9.156050e-01	ko00250	ENSOARG00000001884(RIMKLB);ENSOARG00000005565(ADSS);ENSOARG00000018757(GLUL)	K18310+K01939+K01915
Metabolism	Xenobiotics biodegradation and metabolism	Metabolism of xenobiotics by cytochrome P450	5	53	0.7460889	9.194007e-01	ko00980	ENSOARG00000003346(CYP1A2);ENSOARG00000003423(CYP1A1);ENSOARG00000009599(ALDH1A3);ENSOARG00000012968(-);ENSOARG00000019217(UGT1A1)	K07409+K07408+K00129+K00799+K00699
Human Diseases	Infectious diseases	Legionellosis	5	53	0.7460889	9.194007e-01	ko05134	ENSOARG00000001031(MYD88);ENSOARG00000006511(ARF1);ENSOARG00000009701(CASP9);ENSOARG00000012718(NFKB1);ENSOARG00000017426(RELA)	K04729+K07937+K04399+K02580+K04735
Cellular Processes	Transport and catabolism	Peroxisome	13	130	0.7474084	9.194007e-01	ko04146	ENSOARG00000001290(PEX13);ENSOARG00000004154(PEX5);ENSOARG00000006004(SCP2);ENSOARG00000007397(FAR1);ENSOARG00000007614(ACSL1);ENSOARG00000011989(DECR2);ENSOARG00000014583(PEX2);ENSOARG00000018566(CAT);ENSOARG00000018705(NUDT12);MSTRG.11705(--);MSTRG.13158(--);MSTRG.19768(--);MSTRG.3127(--)	K13344+K13342+K08764+K13356+K01897+K13237+K06664+K03781+K03426+K00308+K00308+K00308+K00308
Human Diseases	Cancers	Chemical carcinogenesis	6	63	0.7480997	9.194007e-01	ko05204	ENSOARG00000003346(CYP1A2);ENSOARG00000003423(CYP1A1);ENSOARG00000007592(PTGS2);ENSOARG00000009599(ALDH1A3);ENSOARG00000012968(-);ENSOARG00000019217(UGT1A1)	K07409+K07408+K11987+K00129+K00799+K00699
Organismal Systems	Excretory system	Aldosterone-regulated sodium reabsorption	3	33	0.7494131	9.194007e-01	ko04960	ENSOARG00000000285(INSR);ENSOARG00000015529(MAPK1);ENSOARG00000020473(IRS1)	K04527+K04371+K16172
Organismal Systems	Digestive system	Salivary secretion	7	73	0.7511444	9.194007e-01	ko04970	ENSOARG00000003836(SLC9A1);ENSOARG00000007989(GUCY1B1);ENSOARG00000008132(ITPR1);ENSOARG00000009163(KCNMA1);ENSOARG00000014352(ADRB2);ENSOARG00000017199(ADCY7);ENSOARG00000019182(ADCY6)	K05742+K12319+K04958+K04936+K04142+K08047+K08046
Genetic Information Processing	Translation	Aminoacyl-tRNA biosynthesis	4	44	0.7622351	9.255712e-01	ko00970	ENSOARG00000002035(WARS);ENSOARG00000009941(PARS2);ENSOARG00000011094(-);MSTRG.15549(VARS1)	K01867+K01881+K02433+K01873
Environmental Information Processing	Signal transduction	Hedgehog signaling pathway	4	44	0.7622351	9.255712e-01	ko04340	ENSOARG00000004241(SMO);ENSOARG00000008578(PTCH1);ENSOARG00000015331(-);ENSOARG00000017420(GLI3)	K06226+K06225+K08960+K06230
Genetic Information Processing	Replication and repair	DNA replication	3	35	0.7847184	9.491060e-01	ko03030	ENSOARG00000006255(-);ENSOARG00000014479(RPA1);ENSOARG00000017675(RNASEH2C)	K02326+K07466+K10745
Organismal Systems	Nervous system	Synaptic vesicle cycle	5	57	0.8014126	9.649862e-01	ko04721	ENSOARG00000006349(AP2B1);ENSOARG00000006613(-);ENSOARG00000016832(ATP6V1C1);ENSOARG00000019488(ATP6V1A);ENSOARG00000021165(ATP6V1D)	K11825+K11826+K02148+K02145+K02149
Genetic Information Processing	Replication and repair	Fanconi anemia pathway	4	47	0.8062475	9.649862e-01	ko03460	ENSOARG00000001873(WDR48);ENSOARG00000007323(ERCC4);ENSOARG00000014479(RPA1);ENSOARG00000016778(POLK)	K15361+K10848+K07466+K03511
Metabolism	Lipid metabolism	Fatty acid degradation	3	37	0.8158062	9.649862e-01	ko00071	ENSOARG00000006198(CPT2);ENSOARG00000007614(ACSL1);ENSOARG00000019178(ACADL)	K08766+K01897+K00255
Metabolism	Carbohydrate metabolism	Butanoate metabolism	2	26	0.8183769	9.649862e-01	ko00650	ENSOARG00000008682(HMGCS1);ENSOARG00000017489(AACS)	K01641+K01907
Organismal Systems	Immune system	Cytosolic DNA-sensing pathway	4	48	0.8193615	9.649862e-01	ko04623	ENSOARG00000000939(MAVS);ENSOARG00000002952(ADAR);ENSOARG00000012718(NFKB1);ENSOARG00000017426(RELA)	K12648+K12968+K02580+K04735
Human Diseases	Infectious diseases	Staphylococcus aureus infection	4	48	0.8193615	9.649862e-01	ko05150	ENSOARG00000015656(ICAM1);ENSOARG00000019840(PTAFR);ENSOARG00000020498(MASP1);MSTRG.12741(C5)	K06490+K04279+K03992+K03994
Metabolism	Lipid metabolism	Fatty acid biosynthesis	1	14	0.8199229	9.649862e-01	ko00061	ENSOARG00000007614(ACSL1)	K01897
Environmental Information Processing	Signaling molecules and interaction	Cytokine-cytokine receptor interaction	23	236	0.8339155	9.775589e-01	ko04060	ENSOARG00000000123(-);ENSOARG00000000510(IFNGR1);ENSOARG00000000651(BMPR1A);ENSOARG00000002562(IL6R);ENSOARG00000007625(IL10RA);ENSOARG00000007733(ACVR1);ENSOARG00000008343(LTBR);ENSOARG00000009845(OSMR);ENSOARG00000009932(-);ENSOARG00000010971(TGFBR1);ENSOARG00000013096(IL18R1);ENSOARG00000013144(IL1R1);ENSOARG00000013188(IFNAR1);ENSOARG00000013309(IFNAR2);ENSOARG00000014726(TGFBR2);ENSOARG00000…	K05508+K05132+K04673+K05055+K05134+K04675+K03159+K05057+K05058+K04674+K05173+K04386+K05130+K05131+K04388+K05076+K05141+K21283+K05071+K05453+K02582+K04723+K03158
Genetic Information Processing	Translation	Ribosome biogenesis in eukaryotes	6	71	0.8420681	9.775589e-01	ko03008	ENSOARG00000001260(CSNK2A2);ENSOARG00000001883(NMD3);ENSOARG00000002547(RBM28);ENSOARG00000009424(NOL6);ENSOARG00000012528(MDN1);ENSOARG00000020325(WDR3)	K03097+K07562+K14573+K14544+K14572+K14556
Genetic Information Processing	Replication and repair	Nucleotide excision repair	8	92	0.8464729	9.775589e-01	ko03420	ENSOARG00000006255(-);ENSOARG00000007323(ERCC4);ENSOARG00000011716(DDB1);ENSOARG00000014479(RPA1);MSTRG.12547(--);MSTRG.25642(--);MSTRG.28440(--);MSTRG.7845(--)	K02326+K10848+K10610+K07466+K10838+K10838+K10838+K10838
Human Diseases	Substance dependence	Morphine addiction	7	82	0.848324	9.775589e-01	ko05032	ENSOARG00000005073(GRK6);ENSOARG00000006517(PDE3B);ENSOARG00000010164(GNAI2);ENSOARG00000017199(ADCY7);ENSOARG00000017377(GNAI1);ENSOARG00000019182(ADCY6);ENSOARG00000019244(GNAI3)	K08291+K13296+K04630+K08047+K04630+K08046+K04630
Genetic Information Processing	Transcription	RNA polymerase	2	28	0.8494588	9.775589e-01	ko03020	ENSOARG00000013874(-);ENSOARG00000020601(POLR1A)	K03006+K02999
Organismal Systems	Excretory system	Endocrine and other factor-regulated calcium reabsorption	3	40	0.8552434	9.775589e-01	ko04961	ENSOARG00000006349(AP2B1);ENSOARG00000006613(-);ENSOARG00000019182(ADCY6)	K11825+K11826+K08046
Metabolism	Lipid metabolism	Primary bile acid biosynthesis	1	16	0.8590844	9.775589e-01	ko00120	ENSOARG00000006004(SCP2)	K08764
Metabolism	Metabolism of other amino acids	Selenocompound metabolism	1	16	0.8590844	9.775589e-01	ko00450	ENSOARG00000016814(TXNRD1)	K22182
Organismal Systems	Endocrine system	Insulin secretion	6	73	0.8605148	9.775589e-01	ko04911	ENSOARG00000009163(KCNMA1);ENSOARG00000009957(CREB3L2);ENSOARG00000017199(ADCY7);ENSOARG00000018416(-);ENSOARG00000019182(ADCY6);ENSOARG00000020471(SLC2A1)	K04936+K09048+K08047+K04515+K08046+K07299
Metabolism	Metabolism of other amino acids	Glutathione metabolism	4	52	0.8646826	9.775589e-01	ko00480	ENSOARG00000004237(G6PD);ENSOARG00000007929(GPX3);ENSOARG00000012968(-);ENSOARG00000016253(-)	K00036+K00432+K00799+K00802
Metabolism	Nucleotide metabolism	Pyrimidine metabolism	8	95	0.870165	9.775589e-01	ko00240	ENSOARG00000006255(-);ENSOARG00000006937(ENTPD6);ENSOARG00000013284(NT5E);ENSOARG00000013874(-);ENSOARG00000017549(DPYD);ENSOARG00000017620(DTYMK);ENSOARG00000020601(POLR1A);ENSOARG00000021021(-)	K02326+K01511+K19970+K03006+K00207+K00943+K02999+K01520
Metabolism	Metabolism of cofactors and vitamins	Pantothenate and CoA biosynthesis	1	17	0.8753488	9.775589e-01	ko00770	ENSOARG00000017549(DPYD)	K00207
Metabolism	Metabolism of cofactors and vitamins	Porphyrin and chlorophyll metabolism	2	30	0.875623	9.775589e-01	ko00860	ENSOARG00000017706(CPOX);ENSOARG00000019217(UGT1A1)	K00228+K00699
Genetic Information Processing	Folding, sorting and degradation	Proteasome	3	42	0.8772477	9.775589e-01	ko03050	ENSOARG00000003753(PSME4);ENSOARG00000007866(PSMB9);ENSOARG00000017558(-)	K06699+K02741+K03064
Metabolism	Amino acid metabolism	Arginine biosynthesis	1	18	0.8897382	9.775589e-01	ko00220	ENSOARG00000018757(GLUL)	K01915
Metabolism	Glycan biosynthesis and metabolism	Other glycan degradation	1	18	0.8897382	9.775589e-01	ko00511	ENSOARG00000007012(FUCA1)	K01206
Metabolism	Energy metabolism	Nitrogen metabolism	1	18	0.8897382	9.775589e-01	ko00910	ENSOARG00000018757(GLUL)	K01915
Organismal Systems	Endocrine system	Thyroid hormone synthesis	5	66	0.8910587	9.775589e-01	ko04918	ENSOARG00000007929(GPX3);ENSOARG00000008132(ITPR1);ENSOARG00000009957(CREB3L2);ENSOARG00000017199(ADCY7);ENSOARG00000019182(ADCY6)	K00432+K04958+K09048+K08047+K08046
Genetic Information Processing	Transcription	Spliceosome	11	129	0.8913037	9.775589e-01	ko03040	ENSOARG00000000590(-);ENSOARG00000002671(SNW1);ENSOARG00000005409(DHX8);ENSOARG00000007633(RBM22);ENSOARG00000008935(HNRNPK);ENSOARG00000010098(CDC40);ENSOARG00000010884(RBMX);ENSOARG00000013468(SLU7);ENSOARG00000013949(SNRNP200);ENSOARG00000019105(DDX23);ENSOARG00000020745(-)	K12886+K06063+K12818+K12872+K12886+K12816+K12885+K12819+K12854+K12858+K12866
Metabolism	Amino acid metabolism	Cysteine and methionine metabolism	3	44	0.8962319	9.794534e-01	ko00270	ENSOARG00000014411(MTAP);ENSOARG00000016253(-);ENSOARG00000019369(AHCYL1)	K00772+K00802+K01251
Metabolism	Metabolism of cofactors and vitamins	One carbon pool by folate	1	19	0.9024684	9.827592e-01	ko00670	ENSOARG00000003065(MTHFD1L)	K13402
Metabolism	Lipid metabolism	Glycerophospholipid metabolism	7	91	0.91239	9.900402e-01	ko00564	ENSOARG00000000536(AGPAT1);ENSOARG00000001430(PLPP5);ENSOARG00000003059(GPAT3);ENSOARG00000011368(LPGAT1);ENSOARG00000017292(CDS2);ENSOARG00000018771(SELENOI);ENSOARG00000019293(DGKD)	K13509+K18693+K13506+K13514+K00981+K00993+K00901
Metabolism	Nucleotide metabolism	Purine metabolism	14	167	0.9254247	1.000000e+00	ko00230	ENSOARG00000004229(PKLR);ENSOARG00000004952(NUDT9);ENSOARG00000005565(ADSS);ENSOARG00000006255(-);ENSOARG00000006517(PDE3B);ENSOARG00000006937(ENTPD6);ENSOARG00000007989(GUCY1B1);ENSOARG00000009837(PGM2);ENSOARG00000013284(NT5E);ENSOARG00000013874(-);ENSOARG00000017199(ADCY7);ENSOARG00000019182(ADCY6);ENSOARG00000020601(POLR1A);ENSOARG00000020913(PRUNE1)	K12406+K13988+K01939+K02326+K13296+K01511+K12319+K15779+K19970+K03006+K08047+K08046+K02999+K01514
Genetic Information Processing	Replication and repair	Mismatch repair	1	22	0.9325076	1.000000e+00	ko03430	ENSOARG00000014479(RPA1)	K07466
Organismal Systems	Excretory system	Proximal tubule bicarbonate reclamation	1	22	0.9325076	1.000000e+00	ko04964	ENSOARG00000012378(SLC4A4)	K13575
Genetic Information Processing	Replication and repair	Homologous recombination	2	37	0.9375727	1.000000e+00	ko03440	ENSOARG00000002264(RAD54L);ENSOARG00000014479(RPA1)	K10875+K07466
Metabolism	Lipid metabolism	alpha-Linolenic acid metabolism	1	23	0.9403046	1.000000e+00	ko00592	ENSOARG00000013845(FADS2)	K10226
Metabolism	Xenobiotics biodegradation and metabolism	Drug metabolism - other enzymes	4	66	0.9550251	1.000000e+00	ko00983	ENSOARG00000012968(-);ENSOARG00000017549(DPYD);ENSOARG00000019217(UGT1A1);ENSOARG00000021021(-)	K00799+K00207+K00699+K01520
Human Diseases	Immune diseases	Rheumatoid arthritis	5	81	0.9644232	1.000000e+00	ko05323	ENSOARG00000015656(ICAM1);ENSOARG00000016832(ATP6V1C1);ENSOARG00000019349(CSF1);ENSOARG00000019488(ATP6V1A);ENSOARG00000021165(ATP6V1D)	K06490+K02148+K05453+K02145+K02149
Human Diseases	Immune diseases	Primary immunodeficiency	1	30	0.9747359	1.000000e+00	ko05340	ENSOARG00000015718(PTPRC)	K06478
Metabolism	Carbohydrate metabolism	Fructose and mannose metabolism	1	31	0.9776581	1.000000e+00	ko00051	ENSOARG00000005886(PFKFB1)	K19028
Metabolism	Lipid metabolism	Linoleic acid metabolism	1	31	0.9776581	1.000000e+00	ko00591	ENSOARG00000003346(CYP1A2)	K07409
Genetic Information Processing	Replication and repair	Base excision repair	1	31	0.9776581	1.000000e+00	ko03410	ENSOARG00000006255(-)	K02326
Organismal Systems	Sensory system	Taste transduction	6	108	0.9890341	1.000000e+00	ko04742	ENSOARG00000019182(ADCY6);MSTRG.12080(--);MSTRG.16466(--);MSTRG.20680(--);MSTRG.21407(--);MSTRG.25105(--)	K08046+K08474+K08474+K08474+K08474+K08474
Organismal Systems	Digestive system	Carbohydrate digestion and absorption	1	38	0.990555	1.000000e+00	ko04973	ENSOARG00000006526(AKT2)	K04456
Human Diseases	Substance dependence	Nicotine addiction	1	39	0.9916488	1.000000e+00	ko05033	ENSOARG00000009425(GRIA1)	K05197
Metabolism	Lipid metabolism	Arachidonic acid metabolism	2	57	0.9922914	1.000000e+00	ko00590	ENSOARG00000007592(PTGS2);ENSOARG00000007929(GPX3)	K11987+K00432
Organismal Systems	Immune system	Intestinal immune network for IgA production	1	41	0.9934714	1.000000e+00	ko04672	ENSOARG00000008343(LTBR)	K03159
Genetic Information Processing	Transcription	Basal transcription factors	1	42	0.9942278	1.000000e+00	ko03022	ENSOARG00000014879(TAF4)	K03129
Human Diseases	Immune diseases	Systemic lupus erythematosus	5	105	0.9952518	1.000000e+00	ko05322	ENSOARG00000005791(ACTN4);ENSOARG00000013149(HIST2H2BE);ENSOARG00000021179(ACTN1);MSTRG.12741(C5);MSTRG.19631(C8G)	K05699+K11252+K05699+K03994+K03999
Metabolism	Lipid metabolism	Ether lipid metabolism	1	46	0.9964735	1.000000e+00	ko00565	ENSOARG00000018771(SELENOI)	K00993
Organismal Systems	Immune system	Antigen processing and presentation	1	57	0.9990919	1.000000e+00	ko04612	ENSOARG00000015263(CTSB)	K01363
Organismal Systems	Digestive system	Protein digestion and absorption	3	109	0.9998289	1.000000e+00	ko04974	ENSOARG00000019354(SLC7A8);ENSOARG00000019480(SLC38A2);ENSOARG00000020503(COL4A4)	K13781+K14207+K06237
Environmental Information Processing	Signaling molecules and interaction	Neuroactive ligand-receptor interaction	9	232	0.9999926	1.000000e+00	ko04080	ENSOARG00000009425(GRIA1);ENSOARG00000011653(RXFP2);ENSOARG00000013533(CHRNB1);ENSOARG00000014352(ADRB2);ENSOARG00000015385(AGTR1);ENSOARG00000016918(F2RL2);ENSOARG00000016937(F2R);ENSOARG00000019840(PTAFR);MSTRG.23933(S1PR5)	K05197+K04307+K04812+K04142+K04166+K04235+K03914+K04279+K04295
Genetic Information Processing	Translation	Ribosome	4	159	0.999995	1.000000e+00	ko03010	ENSOARG00000004370(-);ENSOARG00000007383(-);ENSOARG00000013126(RPS21);MSTRG.27718(RPL10)	K02901+K02920+K02971+K02866
Organismal Systems	Sensory system	Olfactory transduction	2	437	1	1.000000e+00	ko04740	ENSOARG00000012081(OR4E1);ENSOARG00000018416(-)	K04257+K04515
