# Supplementary material for: Vitamin E Can Ameliorate Oxidative Damage of Ovine Hepatocytes In Vitro by Regulating Genes Expression Associated with Apoptosis and Pyroptosis, but Not Ferroptosis
Source: Molecules. 2021 Jul 27;26(15):4520. doi: 10.3390/molecules26154520 (PMC8348559; doi:10.3390/molecules26154520)
Supplement: Supplementary file 1 [file molecules-26-04520-s001.zip › Supplementary File 5.xlsx]

## Sheet: Sheet1
Sample	RawData(bp)	RawDatas	BF_Q20(%)	BF_Q30(%)	BF_N(%)	BF_GC(%)	CleanData(bp)	CleanData(%)	AF_Q20(%)	AF_Q30(%)	AF_N(%)	AF_GC(%)
C1_1	6875542500	45836950	6739308299 (98.02%)	6483669793 (94.30%)	92100 (0.00%)	3205077200 (46.62%)	6850827329	45674400 (99.65%)	6723701404 (98.14%)	6470460384 (94.45%)	86883 (0.00%)	3192714082 (46.60%)
C1_2	5485230000	36568200	5377337451 (98.03%)	5171750057 (94.29%)	73278 (0.00%)	2503203505 (45.64%)	5466127724	36442462 (99.66%)	5365224345 (98.15%)	5161467087 (94.43%)	69337 (0.00%)	2493813424 (45.62%)
C1_3	6074658600	40497724	5956495943 (98.05%)	5730670145 (94.34%)	81531 (0.00%)	2695919332 (44.38%)	6052318069	40351936 (99.64%)	5942322114 (98.18%)	5718672200 (94.49%)	77385 (0.00%)	2685091229 (44.36%)
C2_1	5502104100	36680694	5393104248 (98.02%)	5184626724 (94.23%)	74263 (0.00%)	2463768579 (44.78%)	5481748043	36546678 (99.63%)	5380193440 (98.15%)	5173675514 (94.38%)	70083 (0.00%)	2453866526 (44.76%)
C2_2	11080575600	73870504	10866497735 (98.07%)	10459604368 (94.40%)	148688 (0.00%)	5079939413 (45.85%)	11039929055	73603456 (99.64%)	10840835659 (98.20%)	10437851284 (94.55%)	139914 (0.00%)	5059752284 (45.83%)
C2_3	6147272400	40981816	6030459377 (98.10%)	5808581065 (94.49%)	83474 (0.00%)	2822200709 (45.91%)	6125429661	40838452 (99.65%)	6016616558 (98.22%)	5796839129 (94.64%)	74062 (0.00%)	2811366873 (45.90%)
T1_1	8248033800	54986892	8089323881 (98.08%)	7787049780 (94.41%)	109585 (0.00%)	3862731505 (46.83%)	8221040387	54809804 (99.68%)	8072288880 (98.19%)	7772630316 (94.55%)	104001 (0.00%)	3848992544 (46.82%)
T1_2	6217336500	41448910	6102785950 (98.16%)	5887069278 (94.69%)	83019 (0.00%)	2968269288 (47.74%)	6197167721	41316936 (99.68%)	6090076819 (98.27%)	5876320150 (94.82%)	78420 (0.00%)	2957860642 (47.73%)
T1_3	6014384100	40095894	5896941343 (98.05%)	5678405401 (94.41%)	81975 (0.00%)	2818459372 (46.86%)	5989052386	39929590 (99.59%)	5880957847 (98.20%)	5664767307 (94.59%)
