# Supplementary figures and images for: Vitamin E Can Ameliorate Oxidative Damage of Ovine Hepatocytes In Vitro by Regulating Genes Expression Associated with Apoptosis and Pyroptosis, but Not Ferroptosis
Source: MDPI journal article supplement (doi:10.3390/molecules26154520), 2021-07-27

**Supplementary figure S2**

Purity of primary sheep hepatocytes detected by immunofluorescence

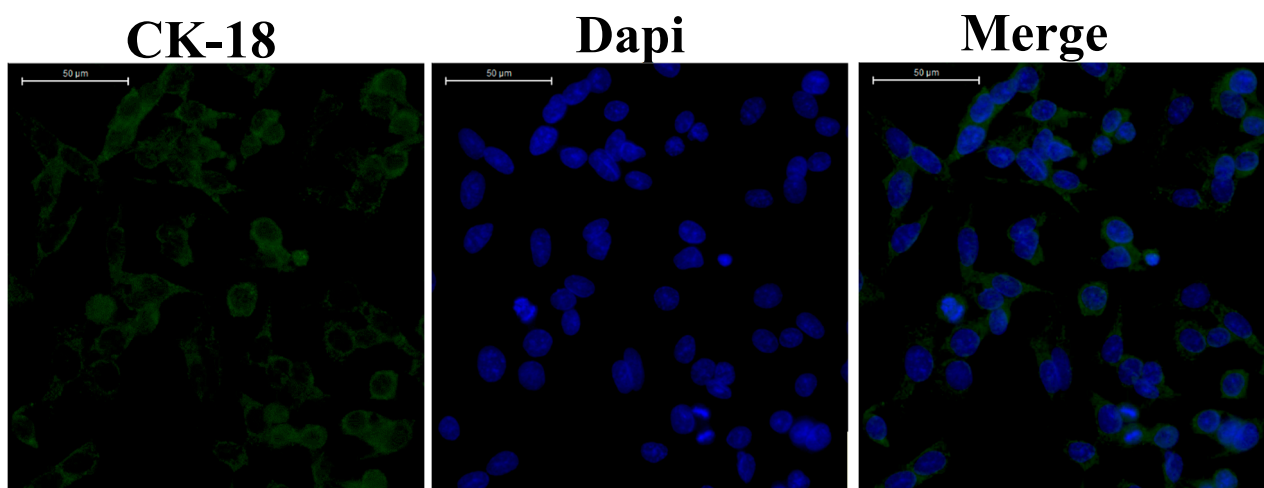

Supplement: s1 [file s1]

**Supplementary figure S1**

Image of primary sheep hepatocytes (24h after separated)

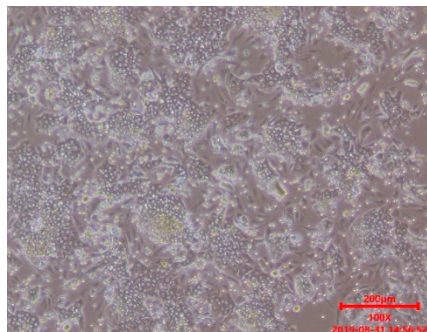

100X

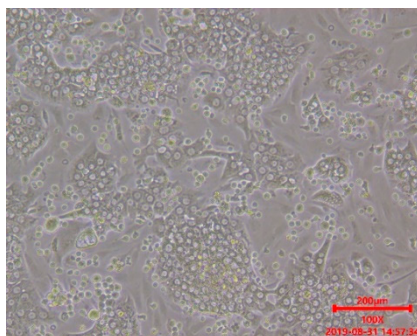

200×

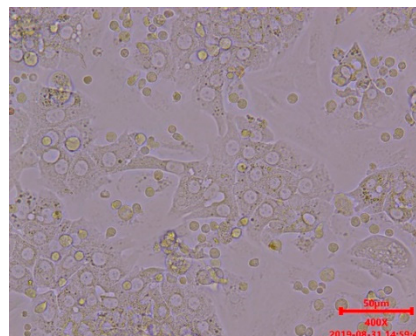

400×

Supplement: s1 [file s1]
